# Supplementary material for: SOX21 modulates SOX2-initiated differentiation of epithelial cells in the extrapulmonary airways
Source: eLife. 2021 Jul 21;10:e57325. doi: 10.7554/eLife.57325 (PMC8331192; doi:10.7554/eLife.57325)
Supplement: Figure 1—source data 1. [file elife-57325-fig1-data1.xlsx]

## Sheet: Fig 1B
		Ventral (Sox9-)			Dorsal(Sox9+)				Ventral/Dorsal
Mouse #	Location	S2 int	S21 int	DAPI	S2int	S21int	DAPI		S2int	S21int	DAPI
37-5-1	1	142138	94171	80288	113906	63470	75260		1.24785	1.48371	1.06681
	2	98348	66635	63618	84077	25879	68117		1.16974	2.57487	0.933952
	3	108365	84287	74518	64856	24576	63860		1.67086	3.42965	1.1669
		Ventral (Sox9-)			Dorsal(Sox9-)				Ventral/Dorsal
Mouse #	Location	S2 int	S21 int	DAPI	S2int	S21int	DAPI		S2int	S21int	DAPI
37-4-1	1	138959	116527	96063	88371	52871	79973		1.57245	2.20399	1.20119
	2	117498	82657	85006	103616	43454	90292		1.13398	1.90217	0.941457
	3	124296	82037	76230	90310	33918	76445		1.37633	2.41869	0.997188
		Ventral (Sox9-)			Dorsal(Sox9-)				Ventral/Dorsal
Mouse #	Location	S2 int	S21 int	DAPI	S2int	S21int	DAPI		S2int	S21int	DAPI
37-6-1	1	119761	91084	78057	100205	60942	77636		1.19516	1.4946	1.00542
	2	117685	90737	74687	92342	45451	70173		1.27445	1.99637	1.06433
	3	105004	74126	73088	75122	27494	67897		1.39778	2.69608	1.07645
