# Supplementary material for: SOX21 modulates SOX2-initiated differentiation of epithelial cells in the extrapulmonary airways
Source: eLife. 2021 Jul 21;10:e57325. doi: 10.7554/eLife.57325 (PMC8331192; doi:10.7554/eLife.57325)
Supplement: Figure 2—source data 1. [file elife-57325-fig2-data1.xlsx]

## Sheet: Fig. 2 C-E
	Control Sox21		TRP63			DAPI			SCGB1A1			DAPI			FOXJ1			DAPI
	Mouse Nr.		Inside	Outside	Total	Inside	Outside	Total	Inside	Outside	Total	Inside	Outside	Total	Inside	Outside	Total	Inside	Outside	Total
	16293-6	Section 1	11	30	41	55	108	163	16	20	36	51	86	137	18	21	39	86	99	185
		Section 2	15	28	43	76	89	165	19	8	27	86	99	185	24	25	49	86	99	185
		Section 3	15	36	51	62	113	175	20	11	31	102	76	178	31	20	51	102	76	178
		Total	41	94	135	193	310	503	55	39	94	239	261	500	73	66	139	274	274	548
	16288-3	Section 1	26	25	51	106	84	190	27	17	44	90	82	172	18	12	30	91	77	168
		Section 2	17	20	37	89	68	157	16	5	21	76	74	150	23	13	36	76	74	150
		Section 3	12	31	43	60	101	161	15	3	18	61	41	102	22	9	31	61	41	102
		Total	55	76	131	255	253	508	58	25	83	227	197	424	63	34	97	228	192	420
	16294-6	Section 1	14	31	45	93	122	215	7	24	31	21	101	122	30	10	40	128	107	235
		Section 2	14	27	41	58	87	145	14	16	30	64	85	149	21	26	47	64	85	149
		Section 3	17	24	41	67	69	136	11	11	22	69	100	169	20	31	51	69	100	169
		Total	45	82	127	218	278	496	32	51	83	154	286	440	71	67	138	261	292	553
	16293-6	%	21.2435	30.3226	26.839				23.0126	14.9425	18.8				26.6423	24.0876	25.365
	16288-3	%	21.5686	30.0395	25.7874				25.5507	12.6904	19.5755				27.6316	17.7083	23.0952
	16294-6	%	20.6422	29.4964	25.6048				20.7792	17.8322	18.8636				27.2031	22.9452	24.9548
	dTG mycSox21		TRP63 not mycSOX21			DAPI			SCGB1A1			DAPI			FOXJ1			DAPI
	Mouse Nr.		Inside	Outside	Total	Inside	Outside	Total	Inside	Outside	Total	Inside	Outside	Total	Inside	Outside	Total	Inside	Outside	Total
	16288-2	Section 1	46	42	88	169	111	280	12	5	17	131	67	198	30	24	54	135	112	247
		Section 2	7	104	111	36	195	231	7	3	10	135	94	229	42	20	62	135	94	229
		Section 3	10	58	68	36	125	161	16	6	22	114	160	274	16	22	38	114	160	274
		Total	63	204	267	241	431	672	35	14	49	380	321	701	88	66	154	384	366	750
	16294-5	Section 1	27	39	66	89	106	195	6	7	13	83	71	154	12	10	22	79	61	140
		Section 2	28	64	92	67	134	201	11	6	17	137	74	211	42	6	48	137	74	211
		Section 3	16	74	90	48	151	199	5	4	9	130	98	228	39	9	48	130	98	228
		Total	71	177	248	204	391	595	22	17	39	350	243	593	93	25	118	346	233	579
	16293-5	Section 1	14	70	84	94	183	277	3	2	5	72	128	200	13	8	21	63	158	221
		Section 2	21	71	92	92	131	223	3	0	3	79	43	122	21	3	24	79	31	110
		Section 3	25	61	86	90	120	210	8	1	9	103	58	161	20	2	22	103	58	161
		Total	60	202	262	276	434	710	14	3	17	254	229	483	54	13	67	245	247	492
	16288-2	%	26.1411	47.3318	39.7321				9.21053	4.36137	6.99001				22.9167	18.0328	20.5333
	16294-5	%	34.8039	45.2685	41.6807				6.28571	6.99588	6.57673				26.8786	10.7296	20.38
	16293-5	%	21.7391	46.5438	36.9014				5.51181	1.31004	3.51967				22.0408	5.26316	13.6179
	dTG mycSox2		TRP63 not mycSOX2			DAPI			SCGB1A1			DAPI			FOXJ1			DAPI
	Mouse Nr.		Inside	Outside	Total	Inside	Outside	Total	Inside	Outside	Total	Inside	Outside	Total	Inside	Outside	Total	Inside	Outside	Total
	16285-7	Section 1	15	57	72	96	193	289	16	12	28	129	155	284	18	14	32	94	99	193
		Section 2	32	45	77	124	126	250	31	15	46	106	149	255	24	18	42	106	149	255
		Section 3	9	58	67	75	179	254	29	21	50	124	185	309	23	22	45	124	185	309
		Total	56	160	216	295	498	793	76	48	124	359	489	848	65	54	119	324	433	757
	16284-1	Section 1	17	38	55	79	107	186	18	18	36	85	91	176	22	8	30	132	106	238
		Section 2	12	23	35	47	74	121	10	12	22	60	97	157	16	7	23	60	97	157
		Section 3	26	54	80	94	148	242	17	10	27	114	116	230	25	7	32	114	116	230
		Total	55	115	170	220	329	549	45	40	85	259	304	563	63	22	85	306	319	625
	16282-8	Section 1	23	47	70	87	141	228	16	14	30	73	114	187	20	19	39	85	98	183
		Section 2	17	32	49	81	72	153	24	2	26	135	81	216	18	6	24	135	81	216
		Section 3	42	54	96	160	150	310	17	8	25	97	113	210	10	23	33	97	113	210
		Total	82	133	215	328	363	691	57	24	81	305	308	613	48	48	96	317	292	609
	16285-7	%	18.9831	32.1285	27.2383				21.1699	9.81595	14.6226				20.0617	12.4711	15.7199
	16284-1	%	25	34.9544	30.9654				17.3745	13.1579	15.0977				20.5882	6.89655	13.6
	16282-8	%	25	36.6391	31.1143				18.6885	7.79221	13.2137				15.142	16.4384	15.7635
	Contrl Sox2	Mouse Nr.	TRP63			DAPI			SCGB1A1			DAPI			FOXJ1			DAPI
			Inside	Outside	Total	Inside	Outside	Total	Inside	Outside	Total	Inside	Outside	Total	Inside	Outside	Total	Inside	Outside	Total
	16284-2	Section 1	39	24	63	149	143	292	26	24	50	163	97	260	43	32	75	158	118	276
		Section 2	9	66	75	75	200	275	35	16	51	114	155	269	25	28	53	114	155	269
		Section 3	17	41	58	86	207	293	29	23	52	106	143	249	21	24	45	106	143	249
		Total	65	131	196	310	550	860	90	63	153	383	395	778	89	84	173	378	416	794
	16282-2	Section 1	40	32	72	165	98	263	65	23	88	177	99	276	58	21	79	187	94	281
		Section 2	16	30	46	79	120	199	32	12	44	123	108	231	29	15	44	123	108	231
		Section 3	31	25	56	119	119	238	29	12	41	152	126	278	36	21	57	152	126	278
		Total	87	87	174	363	337	700	126	47	173	452	333	785	123	57	180	462	328	790
	16294-2	Section 1	18	16	34	100	63	163	34	18	52	113	85	198	39	18	57	127	89	216
		Section 2	12	24	36	81	92	173	25	24	49	84	180	264	26	42	68	84	180	264
		Section 3	19	28	47	107	139	246	31	18	49	92	119	211	23	24	47	92	119	211
		Total	49	68	117	288	294	582	90	60	150	289	384	673	88	84	172	303	388	691
	16284-2	%	20.9677	23.8182	22.7907				23.4987	15.9494	19.6658				23.545	20.1923	21.7884
	16282-2	%	23.9669	25.816	24.8571				27.8761	14.1141	22.0382				26.6234	17.378	22.7848
	16294-2	%	17.0139	23.1293	20.1031				31.1419	15.625	22.2883				29.0429	21.6495	24.8915

## Sheet: Sup. Fig 2B
	Mouse #	TRP63		DAPI
		Medial	Lateral	Medial	Lateral
	1	57	26	111	110
		51.3514	23.6364
		TRP63		DAPI
		Medial	Lateral	Medial	Lateral
	2	91	57	152	141
		59.8684	40.4255
		Medial	Lateral	Medial	Lateral
	3	53	41	105	113
		50.4762	36.2832

## Sheet: Sup. Fig 2C
	Dorsal-ventral n=3 Number of TRP63 cells, 2 section per n
	Mouse #		Trp63	DAPI	%	Average
	3	Ventral-1	19	59	32.2034	36.6145
		Ventral-2	32	78	41.0256
		Dorsal-1	85	132	64.3939	59.0182
		Dorsal-2	81	151	53.6424
	2	Ventral-1	33	77	42.8571	40.8501
		Ventral-2	47	121	38.843
		Dorsal-1	61	102	59.8039	59.5895
		Dorsal-2	57	96	59.375
	1	Ventral-1	37	92	40.2174	34.2878
		Ventral-2	19	67	28.3582
		Dorsal-1	53	99	53.5354	61.4451
		Dorsal-2	86	124	69.3548
