# Supplementary material for: SOX21 modulates SOX2-initiated differentiation of epithelial cells in the extrapulmonary airways
Source: eLife. 2021 Jul 21;10:e57325. doi: 10.7554/eLife.57325 (PMC8331192; doi:10.7554/eLife.57325)
Supplement: Figure 3—source data 1. [file elife-57325-fig3-data1.xlsx]

## Sheet: Fig3 A-D  S21KO E14.5
* not a branch. 300 um from top of image
400um box starting from first branch. Only Medial side
	19-13235.7 WT	Section	TRP63	DAPI	FOXJ1	DAPI	KI67	DAPI	TRP73	DAPI		19-13235.2 WT	Section	TRP63	DAPI	FOXJ1	DAPI	KI67	DAPI	TRP73	DAPI
		1	56	121	1	55	87	201	4	82			1	108	285	37	265	100	269	63	265
		2	60	179	18	245	62	149	13	135			2	66	162	14	132	58	109	11	98
		3	154	438	24	295	68	261	17	202			3	39	136	25	226	98	235	21	238
		Total	270	738	43	595	217	611	34	419			Total	213	583	76	623	256	613	95	601
		%	36.5854		7.22689		35.5155		8.11456				%	36.5352		12.199		41.7618		15.807
	19-13235.6 S21 HET	Section	TRP63	DAPI	FOXJ1	DAPI	KI67	DAPI	TRP73	DAPI		19-13235.3 S21 HET	Section	TRP63	DAPI	FOXJ1	DAPI	KI67	DAPI	TRP73	DAPI
		1	169	351	68	296	177	372	91	394			1	62	206	20	176	9	39	20	114
		2	153	389	44	257	99	270	39	177			2	114	278	47	316	129	301	33	257
		3	95	210	38	228	115	246	91	350			3	117	288	34	204	108	294	38	199
		Total	417	950	150	781	391	888	221	921			Total	293	772	101	696	246	634	91	570
		%	43.8947		19.2061		44.0315		23.9957				%	37.9534		14.5115		38.8013		15.9649
	19-13235.4 S21 KO	Section	TRP63	DAPI	FOXJ1	DAPI	KI67	DAPI	TRP73	DAPI		19-13235.5 S21 KO	Section	TRP63	DAPI	FOXJ1	DAPI	KI67	DAPI	TRP73	DAPI
		1	219	392	85	263	132	313	87	296			1	90	154	73	235	80	182	69	206
		2	137	282	95	271	109	256	88	251			2	104	215	63	198	93	212	73	216
		3	165	348	133	333	92	196	59	155			3			94	261	114	210	66	187
		Total	521	1022	313	867	333	765	234	702			Total	194	369	230	694	287	604	208	609
		%	50.9785		36.1015		43.5294		33.3333				%	52.5745		33.1412		47.5166		34.1544
	19-13235.1 WT	Section	TRP63	DAPI	FOXJ1	DAPI	KI67	DAPI	TRP73	DAPI		19-13235.8 WT	Section	TRP63	DAPI	FOXJ1	DAPI	KI67	DAPI	TRP73	DAPI
		1	83	261	40	294	67	212	23	211			1	87	294	26	276	81	284	6	186
		2	85	192	19	172	57	122	14	94			2	72	185	7	160	54	138	23	314
		3	74	190	26	189	63	140	7	140			3	96	274	31	289	72	259	37	324
		Total	242	643	85	655	187	474	44	445			Total	255	753	64	725	207	681	66	824
		%	37.6361		12.9771		39.4515		9.88764				%	33.8645		8.82759		30.3965		8.00971
	19280.7 S21 KO	Section	TRP63	DAPI	FOXJ1	DAPI	KI67	DAPI	TRP73	DAPI
		1	125	229	43	193	123	266	36	123			S21 KO litter E14.5 - Total
		2	171	256	40	144	127	255	26	135					TRP63	FOXJ1	KI67	TRP73
		3	129	202	16	115	72	160	29	132			19-13235.7 WT		36.5854	7.22689	35.5155	8.11456
		Total	425	687	99	452	322	681	91	390			19-13235.2 WT		36.5352	12.199	41.7618	15.807
		%	61.8632		21.9027		47.2834		23.3333				19-13235.1 WT		37.6361	12.9771	39.4515	9.88764
													19-13235.8 WT		33.8645	8.82759	30.3965	8.00971
													19-13235.6 S21 HET		43.8947	19.2061	44.0315	23.9957
	19280.5 S21 KO	Section	TRP63	DAPI	FOXJ1	DAPI							19-13235.3 S21 HET		37.9534	14.5115	38.8013	15.9649
		1	153	261	31	125							19-13235.4 S21 KO		50.9785	36.1015	43.5294	33.3333
		2											19-13235.5 S21 KO		52.5745	33.1412	47.5166	34.1544
		3
		Total	153	261	31	125							19280.7 S21 KO		61.8632	21.9027	47.2834	23.3333
		%	58.6207		24.8								19280.5 S21 KO		58.6207	24.8
													19280.4 S21 HET		52.5794	9.4086	47.0348	7.17489
													19280.5 S21 HET		46.6364	13.2319	47.5703	15.2855
	19280.4 S21 HET	Section	TRP63	DAPI	FOXJ1	DAPI	KI67	DAPI	TRP73	DAPI
		1	111	200	4	127	106	199	2	111
		2	92	170	18	133	71	171
		3	62	134	13	112	53	119	14	112
		Total	265	504	35	372	230	489	16	223
		%	52.5794		9.4086		47.0348		7.17489
	19280.5 S21 HET	Section	TRP63	DAPI	FOXJ1	DAPI	KI67	DAPI	TRP73	DAPI
		1	126	267	41	357	78	175	49	261
		2	166	335	47	305	108	234
		3/4	221	498	25	192	78	157	34	282
		Total	513	1100	113	854	186	391	83	543
		%	46.6364		13.2319		47.5703		15.2855

## Sheet: Sup Fig 3A-D S2 HET E14.5
400um box starting from first branch. Only Medial side
	19-13227.4 WT	Section	TRP63	DAPI	FOXJ1	DAPI	KI67	DAPI	TRP73	DAPI		19-13227.1 S2het	Section	TRP63	DAPI	FOXJ1	DAPI	KI67	DAPI	TRP73	DAPI
		1	102	221	4	159	92	200	4	216			1	81	220	20	177	22	66	17	193
		2	68	133	3	92	110	232	5	198			2			10	98	109	229	23	208
		3	101	232	8	199	62	150	4	122			3	63	177	28	157	78	202	16	161
		Total	271	586	15	450	264	582	13	536			Total	144	397	58	432	209	497	56	562
		%	46.2457		3.33333		45.3608		2.42537				%	36.272		13.4259		42.0523		9.96441
	19-13227.5 WT	Section	TRP63	DAPI	FOXJ1	DAPI	KI67	DAPI	TRP73	DAPI		19-13227.3 S2het	Section	TRP63	DAPI	FOXJ1	DAPI	KI67	DAPI	TRP73	DAPI
		1	96	191	5	165	69	181	8	200			1	79	193	10	181	64	167	8	102
		2	58	117	3	113	55	116	6	179			2	40	127	16	128
		3	71	188	6	130	63	174	11	179			3	40	127	13	208	78	164	10	172
		Total	225	496	14	408	187	471	25	558			Total	159	447	39	517	142	331	18	274
		%	45.3629		3.43137		39.7028		4.48029				%	35.5705		7.54352		42.9003		6.56934
	19-13227.4 WT	Section	TRP63	DAPI	FOXJ1	DAPI	KI67	DAPI	TRP73	DAPI		19-13227.7 S2het	Section	TRP63	DAPI	FOXJ1	DAPI	KI67	DAPI	TRP73	DAPI
		1	83	171	7	160	58	131	0	126			1	86	271	5	154	76	198	6	166
		2	61	109	0	79	36	75	4	144			2	120	284	8	108	60	128	9	175
		3	51	112	1	85	48	110	2	100			3	50	151	15	136	54	126	5	80
		Total	195	392	8	324	142	316	4	270			Total	256	706	28	398	190	452	20	421
		%	49.7449		2.46914		44.9367		1.48148				%	36.2606		7.03518		42.0354		4.75059
	19-13843.4 WT	Section	TRP63	DAPI	FOXJ1	DAPI	KI67	DAPI	TRP73	DAPI		19-13843.5 S2het	Section	TRP63	DAPI	FOXJ1	DAPI	KI67	DAPI	TRP73	DAPI
		1	136	262	0	125	77	151	0	107			1	54	100	10	279	50	116	8	272
		2	166	352	0	252	149	228	0	224			2	90	252	4	221	139	273	5	247
		3	127	243	1	230	147	280	0	208			3	40	124	1	103	64	144	3	119
		Total	429	857	1	607	373	659	0	539			Total	184	476	15	603	253	533	16	638
		%	50.0583		0.164745		56.6009		0				%	38.6555		2.48756		47.4672		2.50784
	19-13843.7 WT	Section	TRP63	DAPI	FOXJ1	DAPI	KI67	DAPI	TRP73	DAPI		19-13834.6 S2het	Section	TRP63	DAPI	FOXJ1	DAPI	KI67	DAPI	TRP73	DAPI
		1	160	291	0	125	82	156	0	135			1	102	307	7	235	107	237	4	197
		2	60	143	0	96	75	117					2	61	184	1	172	101	217	2	169
		3	177	318	0	203	83	163	0	101			3	55	201	1	165	94	209	0	164
		Total	397	752	1	424	240	436	0	236			Total	218	692	9	572	302	663	6	530
		%	52.7926		0.235849		55.0459		0				%	31.5029		1.57343		45.5505		1.13208
	S2Cre litter E14.5
			TRP63	FOXJ1	KI67	TRP73
	19-13227.4 WT		46.2457	3.33333	45.3608	2.42537
	19-13227.5 WT		45.3629	3.43137	39.7028	4.48029
	19-13227.4 WT		49.7449	2.46914	44.9367	1.48148
	19-13227.1 S2het		36.272	13.4259	42.0523	9.96441
	19-13227.3 S2het		35.5705	7.54352	42.9003	6.56934
	19-13227.7 S2het		36.2606	7.03518	42.0354	4.75059
	19-13843.4 WT		50.0583	0.164745	56.6009	0
	19-13843.7 WT		52.7926	0.291064	55.0459	0
	19-13843.5 S2het		38.6555	2.48756	47.4672	2.50784
	19-13834.6 S2het		31.5029	1.57343	45.5505	1.13208

## Sheet: Fig3E SupFig3E S21 S2 HET E18.5
Whole picture with branch and tracheal rings on the outside
	WT		TRP63	DAPI	FOXJ1	DAPI	SCGB1A1	DAPI
	Mouse Nr.		Total	Total	Total	Total	Total	Total
	16350-3	Section1	103	433	121	430	34	288
		Section2	62	237	98	296	25	296
		Section3	65	202	89	294	41	294
		Total	230	872	308	1020	100	878
	16355-3	Section1	82	273	91	271	46	281
		Section2	51	183	87	245	15	245
		Section3	82	265	67	223	20	223
		Total	215	721	245	739	81	749
	16356-3	Section1	57	192	54	165	24	184
		Section2	77	273	99	308	36	308
		Section3	61	212	80	278	35	278
		Total	195	677	233	751	95	770
		16350-3	26.3761		30.1961		11.3895
		16355-3	29.8197		33.1529		10.8144
		16356-3	28.8035		31.0253		12.3377
	S21 HET		TRP63	DAPI	FOXJ1	DAPI	SCGB1A1	DAPI
	Mouse Nr.		Total	Total	Total	Total	Total	Total
	16355-2	Section1	36	147	50	141	12	136
		Section2	107	330	110	336	28	336
		Section3	105	286	82	217	16	217
		Total	248	763	242	694	56	689
	16366-5	Section1	42	187	67	187	22	202
		Section2	70	200	83	199	25	199
		Section3	59	181	116	251	14	251
		Total	171	568	266	637	61	652
	16375-3	Section1	50	227	64	160	23	113
		Section2	88	267	101	300	32	300
		Section3	87	313	107	327	33	327
		Total	225	807	272	787	88	740
		16355-2	32.5033		34.8703		8.12772
		16366-5	30.1056		41.7582		9.35583
		16375-3	27.881		34.5616		11.8919
	S21 KO		TRP63	DAPI	FOXJ1	DAPI	SCGB1A1	DAPI
	Mouse Nr.		Total	Total	Total	Total	Total	Total
	16366-3	Section1	53	203	176	326	11	137
		Section2	61	187	120	237	15	237
		Section3	51	172	116	238	8	238
		Total	165	562	412	801	34	612
	16366-6	Section1	41	119	56	105	8	117
		Section2	57	194	75	161	11	161
		Section3	64	202	65	135	9	135
		Total	162	515	196	401	28	413
	16366-4	Section1	43	123	56	108	0	0	(no staining)
		Section2	75	208	98	196	12	196
		Section3	84	268	103	214	11	214
		Total	202	599	257	518	23	410
		16366-3	29.3594		51.4357		5.55556
		16366-6	31.4563		48.8778		6.77966
		16366-4	33.7229		49.6139		5.60976
	S2 HET		TRP63	DAPI	FOXJ1	DAPI	SCGB1A1	DAPI
	Mouse Nr.		Total	Total	Total	Total	Total	Total
	16350-2	Section1	19	175	98	232	18	146
		Section2	45	227	66	292	28	292
		Section3	64	224	91	213	12	213
		Total	128	626	255	737	58	651
	16356-2	Section1	88	319	134	401	23	222
		Section2	70	264	60	236	26	236
		Section3	73	289	63	272	22	272
		Total	231	872	257	909	71	730
	16357-3	Section1	70	239	82	226	35	277
		Section2	81	284	81	296	20	296
		Section3	73	281	66	272	17	272
		Total	224	804	229	794	72	845
		16350-2	20.4473		34.5997		8.90937
		16356-2	26.4908		28.2728		9.72603
		16357-3	29.2887		28.8413		8.52071
