# Supplementary material for: SOX21 modulates SOX2-initiated differentiation of epithelial cells in the extrapulmonary airways
Source: eLife. 2021 Jul 21;10:e57325. doi: 10.7554/eLife.57325 (PMC8331192; doi:10.7554/eLife.57325)
Supplement: Figure 4—source data 1. [file elife-57325-fig4-data1.xlsx]

## Sheet: Fig 4C Exp1_P63
Intensity measurements		1								2								3								4								5
			Trp63	Sox2	Sox21	Sox2-n	Sox21-n				Trp63	Sox2	Sox21	Sox2-n	Sox21-n				Trp63	Sox2	Sox21	Sox2-n	Sox21-n				Trp63	Sox2	Sox21	Sox2-n	Sox21-n				Trp63	Sox2	Sox21	Sox2-n	Sox21-n
		1	6380	33900	11010	0.888922	0.744931			1	18902	18157	6892	0.437707	0.437324			1	12924	19076	9579	0.487888	0.669177			1	8845	17254	7310	0.446485	0.521215			1	9221	24250	9615	0.756795	0.84141
		2	18579	27667	9460	0.725481	0.640058			2	22199	42212	13514	1.01759	0.857515			2	11869	18516	9139	0.473566	0.638439			2	14448	22250	9216	0.575768	0.657116			2	17884	28343	11251	0.884529	0.984577
		3	15266	21642	9844	0.567494	0.66604			3	14950	22413	9337	0.540305	0.592469			3	22235	19273	10917	0.492927	0.762647			3	30402	24938	10411	0.645326	0.742322			3	11712	24209	11319	0.755515	0.990527
		4	4596	35180	9427	0.922486	0.637826			4	20315	22946	9239	0.553154	0.58625			4	27918	25779	10123	0.659324	0.70718			4	18055	20046	8211	0.518735	0.585458			4	18116	29161	13705	0.910058	1.19933
		5	5190	44294	16016	1.16147	1.08363			5	28844	29222	11370	0.704448	0.72147			5	21040	27784	10028	0.710604	0.700543			5	20813	38410	15366	0.993944	1.09562			5	16800	19433	10017	0.606466	0.876589
		6	15568	24488	9512	0.642121	0.643577			6	17532	25865	13944	0.623522	0.884801			6	24232	28066	12146	0.717817	0.848504			6	18593	30160	12553	0.780457	0.89505			6	24641	35406	16477	1.10495	1.4419
		7	4528	41841	13010	1.09715	0.880249			7	31397	36288	17212	0.874786	1.09217			7	18876	58479	10711	1.49566	0.748257			7	14397	31438	9575	0.813528	0.682714			7	10404	26654	8346	0.831819	0.73036
		8	5743	18668	5203	0.48951	0.352032			8	20935	37259	21460	0.898194	1.36172			8	15174	25967	11065	0.664133	0.772987			8	13664	17899	7294	0.463176	0.520075			8	12146	22272	7331	0.695065	0.641537
		9	11763	19299	8031	0.506056	0.543373			9	29800	28108	12592	0.677593	0.799011			9	25052	26961	16818	0.689555	1.17488			9	16420	51739	14443	1.33886	1.02981			9	10701	22855	8684	0.71326	0.759938
		10	13916	29960	11705	0.785607	0.791954			10	31	33987	16538	0.819317	1.0494			10	14764	22891	10764	0.585461	0.751959			10	12103	38192	10321	0.988302	0.735905			10	12478	14489	5587	0.452173	0.488919
		11	12359	21380	8435	0.560624	0.570707			11	17979	34103	15231	0.822113	0.966466			11	15028	23597	8931	0.603517	0.623908			11	16398	24742	11172	0.640254	0.796582			11	11898	14977	7318	0.467403	0.640399
		12	4547	36993	19767	0.970026	1.33742			12	30115	36811	14507	0.887394	0.920525			12	22179	28357	13705	0.725259	0.957414			12	23573	21726	8291	0.562208	0.591162			12	17258	30144	9722	0.940735	0.850774
		13	4173	42560	18473	1.116	1.24987			13	23462	49462	18708	1.19237	1.18709			13	17894	27144	13337	0.694236	0.931706			13	17761	26726	8558	0.691594	0.6102			13	14820	26747	7440	0.834721	0.651075
		14	5188	45615	20156	1.19611	1.36374			14	30284	36920	12295	0.890022	0.780165			14	21609	31618	11145	0.808663	0.778575			14	19448	14417	7177	0.373072	0.511732			14	14630	34586	10383	1.07936	0.908618
		15	4982	66807	27963	1.7518	1.89196			15	14742	33608	9670	0.81018	0.613599			15	21647	33112	11283	0.846873	0.788216			15	30632	26085	11613	0.675007	0.828027			15	13700	11682	5655	0.364572	0.49487
		16	16851	38537	16057	1.01051	1.08641			16	15181	30268	10348	0.729664	0.65662			16	16738	39464	12917	1.00933	0.902365			16	20477	34105	16907	0.882542	1.2055			16	15272	13524	5918	0.422057	0.517885
		17	19561	32673	11082	0.856747	0.749802			17	29204	27456	10583	0.661875	0.671532			17	22402	29320	8918	0.749889	0.623			17	30947	46373	18053	1.2	1.28721			17	28160	27290	8656	0.851667	0.757488			ALL exp1
		18	6008	40839	15602	1.07088	1.05562			18	21848	39446	13337	0.950916	0.846284			18	35607	49036	18446	1.25415	1.28861			18	20324	49338	15346	1.27673	1.0942			18	17672	24237	8206	0.756389	0.718108			Average total		37880.9	14061.2
		19	17607	39180	13377	1.02737	0.90508			19	26542	28725	11296	0.692467	0.716775			19	16337	37423	10596	0.957132	0.740223			19	25118	34074	12647	0.88174	0.901752			19	14358	46667	19447	1.45639	1.70181			Avergae rest		47049.9	16952.3
		20	7591	27643	12817	0.724851	0.867191			20	21985	27794	9654	0.670023	0.612584			20	14126	32194	9058	0.823395	0.63278			20	22175	51515	24906	1.33306	1.77584			20	19500	22450	7677	0.70062	0.671815			Average Trp63+		29183.4	11157.9
		21	4715	59348	28063	1.55622	1.89873			21	18261	31854	15580	0.767897	0.988611			21	23521	37043	11357	0.947413	0.793385			21	18790	45435	15573	1.17573	1.11038			21	11976	14265	5060	0.445183	0.442801			# of Trp63	37.2
		22	25520	29880	9760	0.78351	0.660356			22	25797	43320	17105	1.04431	1.08538			22	27943	36852	13852	0.942528	0.967683			22	31410	39241	15380	1.01545	1.09662			22	17243	18896	7678	0.589707	0.671903			% of Trp63	51.7992
		23	7539	36843	12833	0.966093	0.868274			23	15720	18952	8328	0.456871	0.528444			23	29151	41445	12938	1.06	0.903832			23	25885	30750	11292	0.795724	0.805139			23	14626	17065	6953	0.532565	0.608458				Total	Trp63
		24	6243	39811	9054	1.04392	0.612589			24	20547	41560	12347	1.00188	0.783465			24	19411	29600	11905	0.75705	0.831668			24	21751	29324	11347	0.758823	0.80906			24	19089	17456	7557	0.544768	0.661314			% Sox2highSox21high	36.6821	10.5947
		25	10561	21817	9244	0.572083	0.625444			25	13972	15292	7096	0.368641	0.450269			25	28469	49827	15605	1.27438	1.09015			25	22935	45148	12509	1.1683	0.891913			25	22204	24261	9486	0.757138	0.830121			% Sox2highSox21low	8.21951	6.44907
		26	18543	30202	11160	0.791953	0.755079			26	22383	22391	8609	0.539775	0.546274			26	29956	32234	16241	0.824418	1.13458			26	21393	27993	10407	0.724381	0.742037			26	15644	16391	6368	0.511531	0.557265			% Sox2lowSox21high	6.43458	7.65916
		27	5429	51579	18136	1.3525	1.22707			27	19150	33559	13646	0.808999	0.865891			27	18726	30158	12342	0.771322	0.862196			27	30425	31892	12587	0.825276	0.897474			27	22525	31293	9556	0.976593	0.836247			% Sox2lowSox21low	48.6638	75.2971
		28	5432	65045	23295	1.7056	1.57613			28	14800	23043	6296	0.555492	0.399505			28	26543	35568	11951	0.909688	0.834881			28	22940	30084	12301	0.77849	0.877082			28	21083	32125	9315	1.00256	0.815157			Total	100	100
		29	16968	21096	8632	0.553177	0.584036			29	17269	34474	16641	0.831057	1.05594			29	18652	15896	6217	0.406557	0.434312			29	21645	17374	7514	0.449591	0.535761			29	16066	40238	12123	1.25575	1.06089
		30	5125	45331	20522	1.18866	1.38851			30	21603	21028	8234	0.506917	0.522479			30	24073	35307	11781	0.903013	0.823005			30	24308	29558	10163	0.764879	0.724639			30	16416	28447	10826	0.887775	0.947385			Int S2 in S21_high	48935.3
		31	18092	25408	8317	0.666245	0.562724			31	16927	21311	11099	0.513739	0.704274			31	18273	36656	13951	0.937515	0.974599			31	20219	24152	11429	0.624986	0.814907			31	24709	27165	11684	0.847766	1.02247			Int S2 in S21_low	28873.7
		32	16933	44076	16181	1.15576	1.0948			32	15158	18355	6197	0.44248	0.393224			32	11459	24786	9862	0.633927	0.688947			32	17562	22314	9705	0.577424	0.691983			32	18207	24017	8569	0.749523	0.749874
		33	5794	60468	27440	1.58558	1.85658			33	15632	29381	9568	0.708281	0.607126			33	14344	23817	8452	0.609144	0.590446			33	19336	32007	9409	0.828252	0.670878			33	25506	26406	9094	0.824079	0.795817			Int S21 in S2_high		17844.2
		34	4946	70578	18517	1.85069	1.25285			34	15678	22792	9826	0.549441	0.623498			34	10695	18339	6983	0.469039	0.487823			34	15232	14884	6562	0.385156	0.467882			34	19569	17185	5754	0.53631	0.503533			Int S21 in S2_low		10698.2
		35	19452	35130	10748	0.921175	0.727204			35	5220	60382	22590	1.45561	1.43342			35	12561	20911	9545	0.53482	0.666801			35	10482	14746	5246	0.381585	0.374049			35	17200	16168	5874	0.504572	0.514035
		36	23819	27085	11064	0.71022	0.748584			36	12870	66159	23551	1.59488	1.4944			36	7380	7636	4463	0.195299	0.311779			36	13672	21241	6603	0.549658	0.470805			36	14758	28105	9453	0.877102	0.827233
		37	18876	35909	13802	0.941601	0.933836			37	5287	63713	27120	1.53591	1.72087			37	13077	22090	8677	0.564974	0.606164			37	3373	36697	17176	0.949616	1.22468			37	15714	19816	7408	0.618418	0.648275					% of total	% of S2high	%ofS21high
		38	6287	33888	11188	0.888607	0.756974			38	5884	66163	30150	1.59498	1.91313			38	14797	26318	10926	0.67311	0.763276			38	4017	43369	14352	1.12227	1.02332			38	3505	46039	15583	1.43679	1.36367			# of S2 high	32.6	45.5202	100
		39	17133	39400	9456	1.03314	0.639788			39	5903	55062	22451	1.32737	1.4246			39	5714	42212	16056	1.07962	1.12165			39	5162	36971	17081	0.956706	1.2179			39	4958	25606	10775	0.799113	0.942922			# of S21high	31.4	44.1339		100
		40	5173	46622	19041	1.22252	1.2883			40	4877	64369	19708	1.55173	1.25055			40	4876	29194	10907	0.746666	0.761949			40	6089	53095	20005	1.37395	1.42639			40	5164	35047	13711	1.09375	1.19985			# of S2 high only	6.2	8.48281	18.6482
		41	14686	28608	10755	0.750155	0.727677			41	10009	60953	26057	1.46938	1.65342			41	6514	31848	13638	0.814545	0.952733			41	6313	48735	17590	1.26113	1.2542			41	4036	53618	21855	1.67331	1.91253			# of S21 high only	5	7.09655		15.7857
		42	6133	58484	23109	1.53356	1.56354			42	5219	54307	23991	1.30917	1.52232			42	9869	55646	16491	1.4232	1.15204			42	4083	44758	15841	1.15821	1.12949			42	4104	38779	19312	1.21022	1.69			# of S2 low	39.2	54.7179
		43	19654	30407	11716	0.797329	0.792698			43	14105	54039	18671	1.30271	1.18475			43	4980	40717	13778	1.04138	0.962513			43	7186	48754	18390	1.26162	1.31124			43	4669	54741	7511	1.70836	0.657289			# of S21 low	40.4	56.1042
		44	16797	25186	8559	0.660424	0.579097			44	5427	61863	17607	1.49132	1.11723			44	6373	48873	16114	1.24998	1.1257			44	6481	61042	30565	1.5796	2.17934			44	4956	31956	13243	0.997284	1.1589			# of S2highS21high	26.4	37.0373	81.3518	84.2143
		45	4803	57726	32707	1.51368	2.21294			45	9859	52585	17941	1.26765	1.13843			45	6642	44377	13069	1.13499	0.912983			45	5024	49787	18675	1.28835	1.33156			45	4090	39835	12180	1.24317	1.06587
		46	23365	29885	12712	0.783641	0.860087			46	5664	57434	21664	1.38455	1.37466			46	6043	43478	18768	1.11199	1.31111			46	6203	45784	14838	1.18476	1.05797			46	5478	52440	14799	1.63655	1.29506
		47	18775	32125	13663	0.842378	0.924431			47	8029	60754	21667	1.46458	1.37485			47	5981	59404	22048	1.51932	1.54024			47	5199	57823	20986	1.4963	1.49634			47	3902	52955	6068	1.65262	0.531012			AVERAGE	Sox2	Sox21	Sox2-n	Sox21-n
		48	6159	39902	14171	1.04631	0.958802			48	4348	37478	13891	0.903473	0.881437			48	4058	71894	23712	1.83876	1.65649			48	6649	66203	28063	1.71315	2.00094			48	4936	57243	21821	1.78644	1.90956			Lowest value	13539	5233.8	0.358219	0.374777
		49	19384	21397	8233	0.56107	0.55704			49	4343	45751	7298	1.10291	0.463086			49	4459	39311	15392	1.00542	1.07527			49	6304	52342	27627	1.35446	1.96985			49	7825	39781	17153	1.24149	1.50106			Highst value	70710.2	29159.8	1.86645	2.07126
		50	23571	29597	12176	0.776089	0.823821			50	9638	59993	28965	1.44624	1.83794			50	7209	31256	16593	0.799404	1.15917			50	4227	70509	21552	1.82458	1.53669			50	4736	38736	13709	1.20887	1.19968			Average	37880.9	14061.2
		51	8319	54650	20252	1.43303	1.37024			51	4802	56766	20162	1.36844	1.27936			51	6229	82771	21490	2.11695	1.50126			51	5295	54041	19801	1.39843	1.41184			51	5778	33444	10028	1.04372	0.877552
		52	4448	50582	16842	1.32636	1.13952			52	5565	56420	20290	1.3601	1.28748			52	5427	47120	20267	1.20514	1.41583			52	4770	61719	18444	1.59712	1.31509			52	5543	43915	15171	1.3705	1.32762			MIN MAX overall	Sox2-n	Sox21-n
		53	5298	61723	20702	1.61849	1.40069			53	3879	40302	13779	0.971551	0.874331			53	6198	46527	15121	1.18998	1.05633			53	6250	74487	25007	1.92752	1.78304			53	5627	30560	11373	0.953718	0.995253			Lowest value	0.195299	0.311779
		54	25856	39915	15042	1.04665	1.01773			54	4640	67249	21196	1.62116	1.34497			54	5528	54276	28126	1.38816	1.96485			54	6929	65181	18723	1.6867	1.33498			54	4970	52685	18584	1.6442	1.62629			Highst value	2.11695	2.21294
		55	5178	43686	6576	1.14553	0.444929			55	3831	68472	23042	1.65064	1.4621			55	5772	58065	20587	1.48507	1.43818			55	7113	47861	13330	1.23851	0.950452			55	5643	24405	9750	0.761632	0.853224			Average
		56	17939	23333	10030	0.611835	0.678624			56	4736	48840	18431	1.17737	1.16952			56	8290	72168	20224	1.84577	1.41282			56	5398	52565	16037	1.36024	1.14347			56	4615	46642	13523	1.45561	1.1834
		57	28762	36730	13413	0.96313	0.907516			57	8528	61493	21458	1.4824	1.36159			57	6	57271	18899	1.46476	1.32026			57	4458	58497	13438	1.51374	0.958152			57	3699	37199	12750	1.16091	1.11575
		58	23833	37444	14241	0.981852	0.963538			58	5241	54621	16814	1.31674	1.06691			58	4198	55317	13485	1.41479	0.942045			58	14196	50682	13850	1.31151	0.987528			58	10973	37191	15634	1.16066	1.36813
		59	27269	33313	11687	0.873529	0.790736			59	4258	46532	20774	1.12174	1.31819			59	4574	43344	21615	1.10857	1.51			59	3754	46920	17232	1.21416	1.22867			59	6561	32421	11807	1.0118	1.03323
		60	20177	25979	14427	0.681218	0.976123			60	5329	43771	13686	1.05518	0.868429			60	6540	78015	30175	1.99531	2.10799			60	9519	19835	5975	0.513274	0.426028			60	9118	47832	22202	1.49274	1.9429
		61	4961	44294	13641	1.16147	0.922943			61	4693	38978	17190	0.939634	1.09077			61	4911	51119	23178	1.30742	1.61919			61	3496	46978	15842	1.21566	1.12956			61	6155	57060	19444	1.78073	1.70155
		62	4699	36945	16301	0.968767	1.10292			62	4500	49081	18645	1.18318	1.1831			62	5921	57643	24548	1.47428	1.71489			62	5903	45321	15588	1.17278	1.11145			62	4082	49247	14557	1.5369	1.27389
		63	9314	34864	21297	0.9142	1.44094			Average total		41482.1	15759.5					63	4607	54980	18927	1.40617	1.32222			63	4098	40196	10696	1.04016	0.762643			63	4812	54308	16786	1.69485	1.46895
		64	4586	48654	20910	1.2758	1.41476			Avergae rest		55483.2	20313.9					64	6451	72713	18844	1.85971	1.31642			64	2902	22873	11176	0.591889	0.796868			64	7145	34658	14889	1.08161	1.30294
		65	16676	21342	11360	0.559627	0.768611			Average Trp63+		29951.8	12008.8					65	4947	53030	14639	1.3563	1.02266			65	8571	26824	8637	0.69413	0.615833			65	4428	31924	10448	0.996285	0.914306
		66	5745	43007	16248	1.12772	1.09933			# of Trp63	34							66	4572	43560	14723	1.11409	1.02853			66	9268	31259	8482	0.808896	0.604781			66	8233	23247	6986	0.725493	0.611346
		67	18560	36835	13055	0.965883	0.883294			% of Trp63	54.8387							67	4465	38581	12709	0.986749	0.887834			67	10802	29640	11730	0.767	0.836369			67	4521	39051	15607	1.21871	1.36577
		68	4388	59349	18984	1.55624	1.28445				Total	Trp63						68	3686	27872	12468	0.712855	0.870998			68	3828	47773	14227	1.23623	1.01441			68	7526	28868	9882	0.900914	0.864775
		69	4057	55566	17302	1.45704	1.17064			% Sox2highSox21high	40.3226	5.88235						69	6151	36717	14443	0.939075	1.00897			69	3903	37140	11796	0.96108	0.841075			69	3324	40906	11777	1.2766	1.03061
		70	24639	43247	15165	1.13402	1.02606			% Sox2highSox21low	6.45161	5.88235						Average total		39099.1	14314.6					70	11607	30462	14880	0.788272	1.06097			70	4189	44318	20417	1.38308	1.78669
		71	12727	44557	21273	1.16837	1.43932			% Sox2lowSox21high	8.06452	17.6471						Avergae rest		47804.2	17208.8					Average total		38644	14024.9					71	3907	27977	10105	0.873107	0.88429
		72	19780	42814	19703	1.12266	1.33309			% Sox2lowSox21low	45.1613	70.5882						Average Trp63+		30642.7	11503.1					Avergae rest		46382.2	16426.9					72	3146	33910	9966	1.05826	0.872126
		73	17553	20579	6447	0.53962	0.4362			Total	100	100						# of Trp63	35							Average Trp63+		30294.7	11431.1					73	5837	21922	9271	0.684143	0.811307
		74	5268	50420	17268	1.32211	1.16834											% of Trp63	50.7246							# of Trp63	35							Average total		32043	11427.2
		75	12273	28051	14838	0.73555	1.00393			Int S2 in S21_high	53041.7								Total	Trp63						% of Trp63	50							Avergae rest		39586.9	13737.6
		76	19763	31323	13419	0.821348	0.907922			Int S2 in S21_low	29573.3							% Sox2highSox21high	34.7826	5.71429							Total	Trp63						Average Trp63+		24289.6	9052.69
		77	3981	49676	14933	1.3026	1.01036											% Sox2highSox21low	8.69565	8.57143						% Sox2highSox21high	38.5714	20						# of Trp63	36
		78	15993	35376	15128	0.927625	1.02355			Int S21 in S2_high		20193.2						% Sox2lowSox21high	5.7971	5.71429						% Sox2highSox21low	7.14286	5.71429						% of Trp63	49.3151
		79	20347	35560	13760	0.93245	0.930994			Int S21 in S2_low		11863.2						% Sox2lowSox21low	50.7246	80						% Sox2lowSox21high	7.14286	2.85714							Total	Trp63
		80	23911	31756	8111	0.832702	0.548786											Total	100	100						% Sox2lowSox21low	47.1429	71.4286						% Sox2highSox21high	35.6164	8.33333
		81	21304	26594	10855	0.697345	0.734443																			Total	100	100						% Sox2highSox21low	8.21918	5.55556
		82	4908	52732	14310	1.38273	0.968207					% of total	% of S2high	%ofS21high				Int S2 in S21_high	52123.2															% Sox2lowSox21high	4.10959	5.55556
		83	10467	31240	8307	0.819171	0.562047			# of S2 high	29	46.7742	100					Int S2 in S21_low	30204.6							Int S2 in S21_high	49776.4							% Sox2lowSox21low	52.0548	80.5556
		84	21667	25927	8583	0.679855	0.580721			# of S21high	32	51.6129		100												Int S2 in S21_low	28270.9							Total	100	100
		85	3506	41506	13811	1.08837	0.934445			# of S2 high only	4	6.45161	13.7931					Int S21 in S2_high		18363.1
		Average total		38136.1	14779.9					# of S21 high only	7	11.2903		21.875				Int S21 in S2_low		11115.1						Int S21 in S2_high		17947.7						Int S2 in S21_high	41727.4
		Avergae rest		45992.8	17074					# of S2 low	33	53.2258														Int S21 in S2_low		10344.7						Int S2 in S21_low	25093.9
		Average Trp63+		30738	11794					# of S21 low	30	48.3871
		# of Trp63	46							# of S2highS21high	25	40.3226	86.2069	78.125						% of total	% of S2high	%ofS21high												Int S21 in S2_high		14830.9
		% of Trp63	54.1176															# of S2 high	30	43.4783	100							% of total	% of S2high	%ofS21high				Int S21 in S2_low		8770.73
			Total	Trp63														# of S21high	28	40.5797		100				# of S2 high	32	45.7143	100
		% Sox2highSox21high	34.1176	13.0435							Sox2	Sox21	Sox2-n	Sox21-n				# of S2 high only	6	8.69565	20					# of S21high	32	45.7143		100
		% Sox2highSox21low	10.5882	6.52174						Lowest value	15292	6197	0.368641	0.393224				# of S21 high only	4	5.7971		14.2857				# of S2 high only	5	7.14286	15.625							% of total	% of S2high	%ofS21high
		% Sox2lowSox21high	7.05882	6.52174						Highst value	68472	30150	1.65064	1.91313				# of S2 low	39	56.5217						# of S21 high only	5	7.14286		15.625				# of S2 high	33	45.2055	100
		% Sox2lowSox21low	48.2353	73.913						Average	41482.1	15759.5						# of S21 low	41	59.4203						# of S2 low	38	54.2857						# of S21high	30	41.0959		100
		Total	100	100														# of S2highS21high	24	34.7826	80	85.7143				# of S21 low	38	54.2857						# of S2 high only	6	8.21918	18.1818
																										# of S2highS21high	27	38.5714	84.375	84.375				# of S21 high only	3	4.10959		10
		Int S2 in S21_high	48007.9																Sox2	Sox21	Sox2-n	Sox21-n												# of S2 low	40	54.7945
		Int S2 in S21_low	31225.8															Lowest value	7636	4463	0.195299	0.311779					Sox2	Sox21	Sox2-n	Sox21-n				# of S21 low	43	58.9041
																		Highst value	82771	30175	2.11695	2.10799				Lowest value	14417	5246	0.373072	0.374049				# of S2highS21high	27	36.9863	81.8182	90
		Int S21 in S2_high		17885.9														Average	39099.1	14314.6						Highst value	74487	30565	1.92752	2.17934
		Int S21 in S2_low		11397.5																						Average	38644	14024.9							Sox2	Sox21	Sox2-n	Sox21-n
																																		Lowest value	11682	5060	0.364572	0.442801
																																		Highst value	57243	22202	1.78644	1.9429
				% of total	% of S2high	%ofS21high																												Average	32043	11427.2
		# of S2 high	39	46.4286	100															0.195299	0.311779
		# of S21high	35	41.6667		100														2.11695	2.21294
		# of S2 high only	10	11.9048	25.641
		# of S21 high only	6	7.14286		17.1429
		# of S2 low	46	54.7619
		# of S21 low	50	59.5238
		# of S2highS21high	29	34.5238	74.359	82.8571
			Sox2	Sox21	Sox2-n	Sox21-n
		Lowest value	18668	5203	0.48951	0.352032
		Highst value	70578	32707	1.85069	2.21294
		Average	38136.1	14779.9

## Sheet: Fig 4C Exp1_Foxj1
	1						2						3								4						5
		Sox2	Sox21	Foxj1				Sox2	Sox21	Foxj1				Sox2	Sox21	Foxj1	Sox2-n	Sox21-n				Sox2	Sox21	Foxj1				Sox2	Sox21	Foxj1
	1	15063	7612	2988			1	36563	15452	21716			1	68100	13291	18909	1.34984	1.0336			1	61113	14507	26985			1	50811	12112	16751				Exp 1
	2	8478	5357	3329			2	28569	15678	14142			2	75267	17125	23540	1.4919	1.33175			2	71171	20862	26705			2	63495	13914	27833
	3	19376	9585	10958			3	45756	25095	22321			3	63071	20107	23812	1.25016	1.56365			3	77708	10766	23006			3	82554	19259	28396				Average total	34345.5	11845.8
	4	10435	7067	3290			4	45701	21770	23770			4	66090	21701	26739	1.31	1.68761			4	29091	9471	14529			4	68353	18749	17240				Avergae rest	32537.8	11295.4
	5	17662	11440	3307			5	32359	17697	21366			5	71122	19950	30856	1.40974	1.55144			5	51306	15636	24282			5	61294	16007	22804				Average Foxj1+	49965.2	15878.9
	6	12961	7371	4828			6	52314	27864	26607			6	69766	16511	28676	1.38286	1.284			6	38479	13188	21323			6	110673	27346	33308				# of Foxj1	14.6
	7	28261	12941	9509			7	46727	19398	30658			7	90293	20378	21555	1.78974	1.58473			7	57432	17847	26883			7	60810	11350	20290				% of Foxj1	18.4387
	8	14342	6877	3183			8	56971	27727	19045			8	87817	20758	27549	1.74066	1.61428			8	48052	11187	21667			8	58351	8691	18691					Total	Foxj1
	9	30125	17322	18414			9	36161	15934	30381			9	72207	12635	22952	1.43125	0.982581			9	48062	13385	23765			9	60513	15831	21781				% Sox2highSox21high	36.186	78.3314
	10	21737	11778	3807			10	27739	17096	25006			10	68574	13934	26599	1.35924	1.0836			10	31732	11754	14073			10	61982	18279	15910				% Sox2highSox21low	9.97206	13.6203
	11	15378	8490	3161			11	41115	20256	34599			11	46395	11508	16475	0.919616	0.894938			11	30567	11897	15346			11	52049	15814	18206				% Sox2lowSox21high	8.05404	0
	12	29228	16843	11925			12	33701	13095	24776			12	63714	12262	22934	1.2629	0.953574			12	41400	12543	23871			12	53963	16120	19685				% Sox2lowSox21low	45.7879	8.04827
	13	30454	17969	17107			13	37540	18845	26534			13	53307	11007	19150	1.05662	0.855977			13	46140	9902	24293			13	52226	13259	17210				Total	100	100
	14	19969	12103	4646			14	32669	13841	22857			14	27031	10277	2585	0.535793	0.799208			14	36220	10846	14066			14	46079	12619	20384
	15	46059	25146	29468			15	19393	10791	2663			15	30514	7982	3303	0.604831	0.620733			15	46095	12169	17898			15	31699	7495	2032				Int S2 in S21_high	46818.8
	16	34382	19618	19966			16	14844	11649	2195			16	53036	19249	3025	1.05125	1.49693			16	30028	9927	1837			16	38793	7034	2080				Int S2 in S21_low	26820.5
	17	41746	18373	26			17	15320	9131	3242			17	26168	9265	2177	0.518687	0.720508			17	38517	15381	2694			17	20696	6468	2139
	18	22348	15870	4609			18	19245	10497	3168			18	72842	21145	3434	1.44383	1.64438			18	26098	7241	2161			18	40506	9006	3506				Int S21 in S2_high		15776.9
	19	9218	5826	4153			19	13307	5562	2971			19	20899	7371	2685	0.414248	0.573218			19	33425	14888	6107			19	26087	7685	2837				Int S21 in S2_low		8927.05
	20	13163	7402	4146			20	21636	19195	2500			20	78841	18947	3311	1.56274	1.47344			20	33951	13321	2426			20	54322	12190	2628						% of total	% of S2high	%ofS21high
	21	10815	5944	3181			21	16729	11206	3282			21	39217	9217	3349	0.777337	0.716775			21	26696	11020	2029			21	28800	7090	1931				# of S2 high	36.6	46.1581	100
	22	28233	12550	15740			22	16756	13893	3939			22	28807	11157	3314	0.570996	0.867642			22	19231	7636	2124			22	49984	8176	2301				# of S21high	35.8	45.062		100
	23	37731	20853	19665			23	6880	5765	2358			23	54076	21610	3238	1.07186	1.68054			23	38610	9293	2805			23	53661	10740	2828				# of S2 high only	7.2	9.15015	19.5993
	24	23132	12471	3704			24	8546	6842	2656			24	29133	8367	3025	0.577458	0.650673			24	61863	21379	2558			24	45813	8206	1961				# of S21 high only	6.4	8.05404		17.6386
	25	15717	10476	2831			25	10299	6897	2374			25	87631	25985	3806	1.73697	2.02077			25	28693	9861	3010			25	38063	9080	3241				# of S2 low	43	53.8419
	26	32375	14839	22529			26	19069	14704	3233			26	23040	6126	2074	0.456686	0.476398			26	24795	7304	4759			26	33396	9472	3993				# of S21 low	43.8	54.938
	27	26689	17601	4290			27	15346	13533	3841			27	69685	21568	2973	1.38126	1.67727			27	58944	18722	3528			27	34109	8143	3190				# of S2highS21high	29.4	37.0079	80.4007	82.3614
	28	28742	16015	2975			28	26910	16590	3230			28	59186	15663	2716	1.17315	1.21806			28	37324	12549	2648			28	34854	9455	2626
	29	16848	8397	2762			29	18252	18008	2311			29	34542	9198	2323	0.684672	0.715297			29	30400	13027	3227			29	70959	15796	3388				AVERAGE	Sox2	Sox21	Sox2-n	Sox21-n
	30	20893	10036	2286			30	15641	9846	2838			30	30624	5541	3677	0.607012	0.430905			30	22206	6619	3103			30	32145	8964	2173				Lowest value	13906.6	4532.6	0.389197	0.380657
	31	26161	14891	2753			31	17090	13564	4701			31	27772	7992	4659	0.550481	0.621511			31	50090	12005	2680			31	32533	7944	2256				Highst value	76392.2	28802.2	2.26536	2.43462
	32	18739	8571	3597			32	13775	8451	2106			32	75500	22345	3609	1.49652	1.7377			32	33439	14049	2329			32	57318	16378	2322				Average	34345.5	11845.8
	33	28634	10926	28440			33	7662	7028	3172			33	52952	10084	2916	1.04958	0.784199			33	27902	6720	3128			33	57522	15899	3005
	34	17794	7913	2571			34	9951	5750	3479			34	32213	8232	2787	0.638508	0.640175			34	24769	8202	2394			34	34883	7719	2082				MIN MAX overall	Sox2-n	Sox21-n
	35	11131	4995	2984			35	17645	11945	3645			35	34126	12310	10862	0.676427	0.957307			35	20200	8707	3312			35	35212	8312	3238				Lowest value	0.3059	0.298164
	36	24756	11221	21599			36	15974	10837	2311			36	37449	10737	2712	0.742293	0.83498			36	38843	11892	4412			36	33322	10975	2777				Highst value	2.69362	2.85077
	37	15660	8742	3510			37	44353	16031	5286			37	47834	15265	2927	0.948139	1.18711			37	24641	6153	3046			37	70766	20450	3167				Average
	38	17626	6154	2934			38	23627	17120	3167			38	44868	19838	2838	0.889348	1.54273			38	25508	7677	2435			38	38389	10455	2527
	39	28991	11464	26762			39	15245	10712	2554			39	49246	16466	2661	0.976127	1.28051			39	33092	8650	4975			39	75786	21920	3324
	40	14401	6796	6184			40	17145	15636	2861			40	66759	19345	3810	1.32326	1.5044			40	39063	14155	3144			40	21460	5806	2274
	41	24411	9870	20256			41	25346	12754	3456			41	62210	15406	3594	1.23309	1.19807			41	66095	16234	3418			41	57043	24479	3330
	42	34415	14642	26698			42	23658	9171	3838			42	40636	9690	2419	0.805464	0.753559			42	76967	15658	3958			42	76394	30037	3075
	43	23016	10426	2563			43	18805	9758	5209			43	51292	10408	2142	1.01668	0.809395			43	27154	9838	2441			43	33669	9085	2542
	44	21236	10795	2293			44	25494	16185	2994			44	54079	11483	2689	1.07192	0.892994			44	63122	20500	3287			44	106667	28773	3324
	45	29032	17885	24929			45	18832	10069	2485			45	52497	13657	3196	1.04057	1.06206			45	63366	17659	3610			45	51222	20937	3698
	46	24576	10971	8871			46	21463	9611	2772			46	56038	10862	3024	1.11075	0.844701			46	28624	11101	3239			46	59671	17729	2576
	47	21295	13344	2541			47	19951	13118	5286			47	29962	8650	2138	0.59389	0.672681			47	25854	8362	2923			47	30487	9337	2088
	48	23218	10830	2694			48	30194	13475	3288			48	46051	9923	2316	0.912797	0.771678			48	70270	21979	4667			48	29227	6541	2238
	49	17438	6020	2050			49	19721	8549	2295			49	51549	12850	2626	1.02178	0.999301			49	37340	17170	2412			49	22773	5351	4454
	50	32051	11688	20803			50	18932	7034	3111			50	42016	12236	3670	0.832818	0.951552			50	47849	11740	3904			50	27493	12657	3814
	51	24838	9442	3948			51	19114	8842	4361			51	31125	7240	2125	0.616942	0.56303			51	28688	10747	3266			51	48477	13077	3123
	52	14577	8971	3096			52	19480	14791	3085			52	51809	11432	2889	1.02693	0.889028			52	25011	11909	2295			52	33074	9694	2222
	53	12563	5615	2089			53	17743	8800	2695			53	27633	7109	4867	0.547726	0.552843			53	77965	34979	5050			53	40741	14322	3179
	54	17115	9766	2665			54	22709	9189	3055			54	62791	12734	2848	1.24461	0.99028			54	36036	12175	2627			54	79747	17333	4587
	55	32215	15015	25			55	42112	15265	3447			55	55053	11128	2654	1.09123	0.865387			55	30733	9795	2881			55	60730	18030	3045
	56	21659	12327	5152			56	27926	12199	2716			56	34211	9066	2342	0.678111	0.705032			56	47368	15085	2915			56	23773	9067	2360
	57	23029	10515	2252			57	17319	8387	1975			57	60095	13453	3153	1.19117	1.04619			57	43413	20798	2760			57	65397	14319	3095
	58	33572	17705	3129			58	15180	5475	3518			58	64108	14063	2351	1.27071	1.09363			58	28855	10539	2197			58	35105	14254	2009
	59	33112	11559	2867			59	11429	5303	8193			59	74256	15603	2910	1.47186	1.21339			59	27958	10951	2021			59	33571	9743	2429
	60	6908	3656	2076			60	16252	7180	3345			60	39520	12642	1813	0.783343	0.983126			60	39411	14894	3117			60	50716	15554	2887
	61	20686	7583	2202			61	20511	7381	2			61	58919	13597	3086	1.16786	1.05739			61	38183	14667	2366			61	24654	8308	1766
	62	24967	14050	2911			62	28102	12298	2587			62	38450	9623	3974	0.762134	0.748348			62	29869	7331	4619			62	72923	17472	2887
	63	6681	3331	2365			63	26996	10538	2819			63	75055	15546	3607	1.4877	1.20896			63	26224	10197	2578			63	27211	9632	2329
	64	23519	16904	3757			64	17854	7628	2270			64	52763	13108	2489	1.04584	1.01936			64	51354	20132	3011			64	37713	14750	2718
	65	13989	8011	2355			65	20460	11716	4619			65	52817	9086	2401	1.04691	0.706588			65	24352	8136	2568			65	31778	8333	1988
	66	17773	11427	2913			66	20120	9138	3569			66	35806	6239	1687	0.709727	0.485186			66	42670	14866	3320			66	44652	11750	3016
	67	17618	11037	3396			67	19274	8420	3178			67	37296	5951	1691	0.73926	0.462789			67	26902	7607	2070			67	66504	19174	3025
	68	29378	12924	2836			68	30585	18146	3205			68	36217	9901	2052	0.717873	0.769967			68	51122	18429	2079			68	47107	15054	2286
	69	12312	7324	2195			69	19782	7733	2436			69	33446	6429	2161	0.662948	0.499962			69	30091	8511	2466			69	30826	11026	1923
	70	32695	19252	3575			70	31351	15185	2969			70	42607	8594	2039	0.844532	0.668326			70	23609	8116	2659			70	42035	10965	2184
	71	14056	6736	1736			71	15701	7507	2757			71	23636	5458	1551	0.4685	0.42445			71	27325	11450	1675			71	32008	9355	2752
	72	22296	8133	2332			72	15555	5838	2694			72	35535	7764	1669	0.704355	0.60378			72	34451	16833	2458			72	28361	10171	2949
	73	11468	5478	1768			73	33716	10905	3600			73	61338	15758	2174	1.21581	1.22545			73	35648	7273	3068			73	27960	6809	2925
	74	13027	7630	2329			74	18916	8504	2038			Average total	50450.4	12859						74	30976	5150	2094			74	24374	5223	1922
	Average total	21840.5	11171.7				75	15923	5124	2165			Avergae rest	46746.8	12132.9						75	56582	19564	3109			75	56614	13297	2014
	Avergae rest	19257.5	10023.6				76	28568	12386	3473			Average Foxj1+	68901.8	16243.6						76	30841	10834	1936			76	26171	8250	1500
	Average Foxj1+	30640.8	15151.3				77	26478	16451	2538			# of Foxj1	13							77	19412	6615	1946			77	26559	4905	1933
	# of Foxj1	17					78	16556	5722	1611			% of Foxj1	17.8082							78	43926	15727	2736			78	35882	10050	1605
	% of Foxj1	22.973					79	22516	9774	2380				Total	Foxj1						79	37556	14657	1887			79	30265	7898	1959
		Total	Foxj1				80	13968	5640	2056			% Sox2highSox21high	36.9863	76.9231						80	25140	17983	1653			80	26272	8173	1594
	% Sox2highSox21high	36.4865	82.3529				Average total	21998	11467.1				% Sox2highSox21low	16.4384	15.3846						81	20156	6388	2816			81	18408	6342	1934
	% Sox2highSox21low	10.8108	11.7647				Avergae rest	19927.8	10642				% Sox2lowSox21high	5.47945	0						82	20664	8511	2029			82	18468	3710	1306
	% Sox2lowSox21high	8.10811	0				Average Foxj1+	39563.2	19267.7				% Sox2lowSox21low	41.0959	7.69231						83	40280	13939	2045			83	21653	5878	1673
	% Sox2lowSox21low	44.5946	5.88235				# of Foxj1	14					Total	100	100						84	31898	9078	2163			84	16400	3600	1667
	Total	100	100				% of Foxj1	17.5													85	23168	8521	1815			85	16321	4821	1393
								Total	Foxj1				Int S2 in S21_high	65017.4							86	18752	6057	2067			Average total	41087.1	11461.1
	Int S2 in S21_high	29503.2					% Sox2highSox21high	33.75	100				Int S2 in S21_low	38297.9							Average total	36351.5	12270				Avergae rest	40678.5	11353.8
	Int S2 in S21_low	16217.5					% Sox2highSox21low	6.25	0												Avergae rest	36078.3	12324.8				Average Foxj1+	63082.4	15667.9
							% Sox2lowSox21high	15	0				Int S21 in S2_high		15710.4						Average Foxj1+	47637.9	13064				# of Foxj1	14
	Int S21 in S2_high		14535				% Sox2lowSox21low	45	0				Int S21 in S2_low		9510.71						# of Foxj1	15					% of Foxj1	16.4706
	Int S21 in S2_low		7966.62				Total	100	100												% of Foxj1	17.4419						Total	Foxj1
															% of total	% of S2high	%ofS21high					Total	Foxj1				% Sox2highSox21high	38.8235	85.7143
							Int S2 in S21_high	29810.4					# of S2 high	39	53.4247	100					% Sox2highSox21high	34.8837	46.6667				% Sox2highSox21low	7.05882	14.2857
			% of total	% of S2high	%ofS21high		Int S2 in S21_low	17071.3					# of S21high	34	46.5753		100				% Sox2highSox21low	9.30233	26.6667				% Sox2lowSox21high	4.70588	0
	# of S2 high	35	47.2973	100									# of S2 high only	9	12.3288	23.0769					% Sox2lowSox21high	6.97674	0				% Sox2lowSox21low	49.4118	0
	# of S21high	33	44.5946		100		Int S21 in S2_high		16044.1				# of S21 high only	4	5.47945		11.7647				% Sox2lowSox21low	48.8372	26.6667				Total	100	100
	# of S2 high only	8	10.8108	22.8571			Int S21 in S2_low		9556.46				# of S2 low	34	46.5753						Total	100	100
	# of S21 high only	6	8.10811		18.1818								# of S21 low	39	53.4247												Int S2 in S21_high	60421.1
	# of S2 low	39	52.7027						% of total	% of S2high	%ofS21high		# of S2highS21high	30	41.0959	76.9231	88.2353				Int S2 in S21_high	49341.7					Int S2 in S21_low	31781.1
	# of S21 low	41	55.4054				# of S2 high	32	40	100											Int S2 in S21_low	30734.5
	# of S2highS21high	27	36.4865	77.1429	81.8182		# of S21high	39	48.75		100			Sox2	Sox21	Sox2-n	Sox21-n										Int S21 in S2_high		16646.5
							# of S2 high only	5	6.25	15.625			Lowest value	20899	5458	0.414248	0.42445				Int S21 in S2_high		15948.6				Int S21 in S2_low		7914.4
		Sox2	Sox21	Sox2-n	Sox21-n		# of S21 high only	12	15		30.7692		Highst value	90293	25985	1.78974	2.02077				Int S21 in S2_low		9687.04						% of total	% of S2high	%ofS21high
	Lowest value	6681	3331	0.3059	0.298164		# of S2 low	48	60				Average	50450.4	12859								% of total	% of S2high	%ofS21high		# of S2 high	39	45.8824	100
	Highst value	46059	25146	2.10888	2.25086		# of S21 low	41	51.25												# of S2 high	38	44.186	100			# of S21high	37	43.5294		100
	Average	21840.5	11171.7				# of S2highS21high	27	33.75	84.375	69.2308										# of S21high	36	41.8605		100		# of S2 high only	6	7.05882	15.3846
																					# of S2 high only	8	9.30233	21.0526			# of S21 high only	4	4.70588		10.8108
								Sox2	Sox21	Sox2-n	Sox21-n										# of S21 high only	6	6.97674		16.6667		# of S2 low	46	54.1176
							Lowest value	6880	5124	0.312755	0.446844										# of S2 low	48	55.814				# of S21 low	48	56.4706
							Highst value	56971	27864	2.58982	2.42991										# of S21 low	50	58.1395				# of S2highS21high	33	38.8235	84.6154	89.1892
							Average	21998	11467.1												# of S2highS21high	30	34.8837	78.9474	83.3333
																						Sox2	Sox21	Sox2-n	Sox21-n			Sox2	Sox21	Sox2-n	Sox21-n
																					Lowest value	18752	5150	0.515852	0.419723		Lowest value	16321	3600	0.39723	0.314106
																					Highst value	77965	34979	2.14475	2.85077		Highst value	110673	30037	2.69362	2.62078
																					Average	36351.5	12270				Average	41087.1	11461.1

## Sheet: Fig 4C Exp2_P63
	1							2							3							4								5
		Sox2	Sox21	Trp63	Sox2-n	Sox21-n			Sox2	Sox21	Trp63	Sox2-n	Sox21-n			Sox2	Sox21	Trp63	Sox2-n	Sox21-n			Sox2	Sox21	Trp63	Sox2-n	Sox21-n				Sox2	Sox21	Trp63	Sox2-n	Sox21-n
	1	43361	13494	31261	0.543476	0.688352		1	68374	17159	36626	0.812747	0.759394		1	49589	15488	42601	0.540313	0.617946		1	59593	18744	35663	0.840015	0.681958			1	56214	20424	29486	0.758548	0.686079			Exp 2
	2	32363	9725	26549	0.405629	0.496089		2	60559	17586	28297	0.719852	0.778291		2	80380	20728	42808	0.875806	0.827014		2	68067	25855	37771	0.959463	0.940675			2	64409	29912	49358	0.869131	1.0048			Average total	80148	24903.5
	3	50354	13580	31972	0.631124	0.692739		3	58199	10806	35887	0.691799	0.478234		3	34500	10096	26061	0.375906	0.402814		3	53195	21778	63816	0.749829	0.792343			3	42160	15840	39258	0.568905	0.532094			Avergae rest	94594.9	30681.1
	4	53941	11072	32688	0.676083	0.564802		4	79138	12854	39667	0.940697	0.568871		4	59419	13972	51391	0.647419	0.55746		4	45714	17708	46764	0.644378	0.644265			4	56910	17880	49599	0.76794	0.600621			Average Trp63+	64196.7	18351.3
	5	65844	14430	45859	0.825272	0.736099		5	87702	17679	41878	1.0425	0.782407		5	79273	18061	38737	0.863744	0.720605		5	53438	30587	32058	0.753254	1.11284			5	53802	19147	27353	0.726001	0.643182			# of Trp63	37
	6	72943	10374	30683	0.914249	0.529195		6	73364	15445	45642	0.872062	0.683539		6	93416	21522	49327	1.01784	0.858693		6	42575	13637	44398	0.600131	0.496151			6	72642	20228	50854	0.980227	0.679495			% of Trp63	52.1721
	7	75705	11274	33737	0.948867	0.575106		7	64668	13723	41836	0.768695	0.607329		7	105263	22790	51586	1.14693	0.909284		7	35676	18958	31676	0.502884	0.689743			7	60015	16297	54923	0.809839	0.547446				Total	Trp63
	8	77185	13227	35347	0.967417	0.674732		8	83089	21190	44544	0.987661	0.937791		8	82573	20076	51602	0.899701	0.801		8	57929	21624	67046	0.816559	0.78674			8	66524	29917	54821	0.897671	1.00497			% Sox2highSox21high	30.6644	3.81711
	9	76972	12779	45643	0.964747	0.651878		9	62823	19265	28885	0.746764	0.852598		9	59869	15845	36405	0.652322	0.63219		9	51169	15100	43669	0.721271	0.549379			9	70571	32455	46054	0.952281	1.09022			% Sox2highSox21low	9.13415	9.18228
	10	61774	12880	37	0.774259	0.657031		10	81091	15713	57336	0.963912	0.695399		10	101824	24615	55544	1.10946	0.982099		10	46922	21993	41745	0.661406	0.800165			10	44278	18381	43	0.597485	0.617451			% Sox2lowSox21high	6.82922	3.74111
	11	65625	14812	34	0.822527	0.755585		11	92692	25280	63417	1.10181	1.1188		11	96014	22192	61151	1.04615	0.885425		11	47164	16131	44525	0.664817	0.58689			11	55912	19608	62104	0.754473	0.658668			% Sox2lowSox21low	53.3722	83.2595
	12	75584	14205	44724	0.94735	0.724621		12	86271	26409	42621	1.02549	1.16876		12	83656	24792	53639	0.911501	0.989161		12	56178	17039	43504	0.791877	0.619925			12	44373	17096	48157	0.598767	0.574285			Total	100	100
	13	100699	19566	42434	1.26214	0.998095		13	80839	19166	49556	0.960916	0.848216		13	83753	19941	41582	0.912558	0.795614		13	42765	21346	41975	0.602809	0.776625			13	28699	10847	44086	0.387263	0.36437
	14	90550	14076	31318	1.13493	0.718041		14	61252	10267	44763	0.72809	0.454379		14	89963	20921	38572	0.980221	0.834714		14	49550	19200	43360	0.69845	0.698548			14	44877	17545	49119	0.605568	0.589368			Int S2 in S21_high	100686
	15	75685	17046	36279	0.948616	0.869545		15	100862	18586	49190	1.19893	0.822548		15	86282	19030	57550	0.940113	0.759266		15	54460	18944	50075	0.76766	0.689234			15	53138	22464	56153	0.717041	0.754606			Int S2 in S21_low	65041.3
	16	91842	24793	26560	1.15112	1.26473		16	94144	18315	44658	1.11907	0.810554		16	83883	24039	53492	0.913974	0.959117		16	48395	14057	50952	0.682169	0.511432			16	49688	21554	56231	0.670487	0.724038
	17	73175	10983	40783	0.917156	0.560261		17	72085	19256	51023	0.856859	0.852199		17	71457	16652	55891	0.778583	0.664388		17	49280	24104	40552	0.694644	0.876969			17	44975	15717	41258	0.60689	0.527962			Int S21 in S2_high		32500.6
	18	102051	18077	42547	1.27908	0.922138		18	57576	15455	41503	0.684394	0.683981		18	81609	19562	47625	0.889197	0.780492		18	44819	16433	49064	0.631762	0.597877			18	46400	20392	65940	0.626119	0.685004			Int S21 in S2_low		18490.3
	19	84589	19363	42381	1.06022	0.98774		19	68418	18273	29641	0.81327	0.808695		19	95834	28071	73490	1.04419	1.11999		19	46174	19154	43236	0.650862	0.696874			19	63772	23754	50024	0.860536	0.79794					% of total	% of S2high	%ofS21high
	20	70652	17617	33457	0.885534	0.898673		20	59569	13210	51276	0.708084	0.584626		20	92072	23292	64377	1.0032	0.929313		20	51227	28469	55930	0.722089	1.03578			20	51551	17886	53861	0.695626	0.600823			# of S2 high	28.2	39.7986	100
	21	74129	13019	43871	0.929114	0.664121		21	74682	20871	43023	0.887729	0.923673		21	65538	14727	48937	0.71409	0.587583		21	61096	20995	39881	0.861201	0.763855			21	55401	17987	45076	0.747578	0.604216			# of S21high	26.8	37.4936		100
	22	71397	16124	37860	0.894871	0.822513		22	68972	15437	56437	0.819856	0.683185		22	94071	33574	58266	1.02498	1.33955		22	62841	21297	59500	0.885798	0.774843			22	51860	17468	46102	0.699796	0.586782			# of S2 high only	6.4	9.13415	22.4852
	23	47012	8025	22926	0.589236	0.409369		23	57899	13975	31304	0.688233	0.618482		23	84836	20534	56329	0.924358	0.819273		23	60395	20098	50498	0.851319	0.73122			23	82944	22975	45807	1.11924	0.771772			# of S21 high only	5	6.82922		17.9884
	24	95081	17564	39859	1.19172	0.895969		24	83932	18872	51295	0.997682	0.835205		24	91384	29172	42815	0.995704	1.16392		24	59174	19465	34628	0.834108	0.70819			24	80273	23286	42416	1.0832	0.782219			# of S2 low	43	60.2014
	25	62624	16840	31632	0.784913	0.859037		25	63297	13005	51836	0.752398	0.575553		25	71373	17359	42654	0.777667	0.692596		25	66048	24480	38880	0.931003	0.890649			25	52831	17915	45127	0.712898	0.601797			# of S21 low	44.4	62.5064
	26	61779	11867	35487	0.774322	0.605356		26	76394	17903	27487	0.908079	0.792321		26	60324	18324	48604	0.657279	0.731098		26	95069	26358	55629	1.34008	0.958976			26	67974	24643	34370	0.917237	0.827803			# of S2highS21high	21.8	30.6644	77.5148	82.0116
	27	74344	20918	39377	0.931808	1.06706		27	55441	14626	37235	0.659015	0.647293		27	55155	16335	50789	0.600959	0.65174		27	65600	26813	46507	0.924688	0.97553			27	38085	12024	26152	0.513917	0.403908
	28	40556	9603	26095	0.508318	0.489865		28	76262	13938	41169	0.90651	0.616844		28	63980	24260	45920	0.697115	0.967935		28	55863	23253	37060	0.787437	0.846007			28	79804	40638	30435	1.07687	1.3651
	29	53509	15906	25031	0.670668	0.811392		29	82827	16327	49206	0.984547	0.722573		29	112712	24082	41932	1.22809	0.960833		29	47387	19882	52255	0.66796	0.723361			29	55278	17907	33325	0.745918	0.601528			AVERAGE	Sox2	Sox21	Sox2-n	Sox21-n
	30	38145	9795	19867	0.4781	0.49966		30	61593	10291	47783	0.732143	0.455442		30	76641	19456	44256	0.835067	0.776263		30	57178	21987	53631	0.805973	0.799947			30	76667	33115	28396	1.03454	1.11239			Lowest value	33721.6	9844	0.421265	0.392466
	31	49881	11261	34948	0.625196	0.574443		31	56812	16130	35690	0.675312	0.713854		31	78336	17793	41788	0.853535	0.709912		31	44841	17598	44188	0.632072	0.640263			31	44485	21576	47924	0.600278	0.724777			Highst value	143211	50448.4	1.79135	2.03002
	32	40937	13136	30269	0.513094	0.67009		32	41700	12811	44826	0.495679	0.566968		32	81216	23819	43404	0.884915	0.95034		32	39733	20030	45446	0.560071	0.728746			32	54774	20387	43244	0.739117	0.684836			Average	80148	24903.5
	33	38234	11300	28621	0.479215	0.576432		33	47502	15376	35456	0.564646	0.680485		33	65178	15573	34654	0.710168	0.621338		33	53112	23582	40051	0.748659	0.857977			33	54068	20841	25153	0.72959	0.700087
	34	55488	12994	32933	0.695472	0.662846		34	54678	17005	35429	0.649946	0.752578		34	66819	16391	34605	0.728048	0.653974		34	35485	12928	46124	0.500192	0.470356			34	64364	20872	41656	0.868524	0.701128			MIN MAX overall	Sox2-n	Sox21-n
	35	44183	11134	25387	0.553778	0.567964		35	46649	12794	34351	0.554507	0.566215		35	69121	14107	34736	0.75313	0.562847		35	48253	19123	44719	0.680167	0.695747			35	61465	22809	52083	0.829405	0.766195			Lowest value	0.282946	0.315148
	36	52582	14148	30066	0.659049	0.721714		36	105786	28479	9578	1.25746	1.26038		36	79292	21831	42377	0.863951	0.871022		36	36480	13825	37062	0.514217	0.502991			36	54557	21078	45856	0.736189	0.708048			Highst value	2.63404	2.54881
	37	72831	16011	39370	0.912845	0.816748		37	63215	18400	9900	0.751423	0.814316		37	56463	17343	42567	0.615211	0.691958		37	31346	12451	37438	0.441849	0.453001			37	56867	20835	35771	0.76736	0.699885			Average
	38	67323	15752	6758	0.843809	0.803536		38	117967	43632	9426	1.40225	1.93099		38	66241	16667	45264	0.72175	0.664986		38	34992	12370	28693	0.493242	0.450054			38	67254	28525	10385	0.907521	0.958206
	39	103329	34202	8347	1.2951	1.7447		39	55222	22341	10016	0.656412	0.98873		39	90881	33796	8933	0.990223	1.34841		39	90350	31033	10837	1.27356	1.12906			39	92144	42814	7703	1.24339	1.4382
	40	68548	20919	6950	0.859163	1.06711		40	108188	35422	8957	1.28601	1.56765		40	114692	28549	8405	1.24966	1.13906		40	129935	50373	12354	1.83155	1.83271			40	63857	27155	8646	0.861683	0.912185
	41	73079	19142	9099	0.915953	0.976466		41	108710	26568	10494	1.29221	1.1758		41	86509	23853	8319	0.942587	0.951696		41	75944	23145	11258	1.0705	0.842078			41	90214	45156	10630	1.21734	1.51687
	42	81193	17431	7866	1.01765	0.889185		42	154035	50743	9284	1.83098	2.2457		42	91400	23483	6573	0.995878	0.936934		42	103524	41567	18587	1.45926	1.51232			42	105812	35550	14482	1.42782	1.19419
	43	69345	19714	11488	0.869152	1.00564		43	129225	25304	12585	1.53607	1.11986		43	102395	24508	13101	1.11568	0.97783		43	113904	45899	12263	1.60557	1.66993			43	71280	24914	7312	0.961848	0.836906
	44	109146	29271	11547	1.36801	1.49316		44	115431	44066	7392	1.3721	1.9502		44	133973	33574	9415	1.45975	1.33955		44	79524	25667	9024	1.12096	0.933835			44	83246	44523	9179	1.12332	1.49561
	45	102148	28311	10098	1.2803	1.44419		45	110388	31646	8174	1.31216	1.40054		45	106313	24030	9596	1.15837	0.958758		45	110232	46514	8792	1.55381	1.69231			45	89703	47139	15195	1.21045	1.58348
	46	102729	36518	7344	1.28758	1.86285		46	98596	31291	9211	1.17199	1.38482		46	92801	22034	9966	1.01114	0.879121		46	112605	32662	11410	1.58726	1.18833			46	66149	38182	8793	0.892611	1.2826
	47	104127	28657	7877	1.3051	1.46184		47	150438	37615	8224	1.78822	1.6647		47	117377	34937	9601	1.27892	1.39393		47	70667	27529	9235	0.996112	1.00158			47	95994	36337	9034	1.29534	1.22063
	48	93570	20143	5657	1.17278	1.02753		48	81971	18183	10005	0.974372	0.804712		48	98615	31331	11162	1.07449	1.25006		48	66792	26429	7810	0.941491	0.961559			48	93964	33157	10236	1.26794	1.1138
	49	106909	32705	8018	1.33997	1.66834		49	119938	33894	9575	1.42568	1.50002		49	120783	39834	7526	1.31603	1.58931		49	61695	31461	23102	0.869644	1.14464			49	66866	27195	10664	0.902286	0.913529
	50	138945	36619	21208	1.7415	1.868		50	94024	35008	9516	1.11764	1.54932		50	126954	39481	11494	1.38327	1.57523		50	85609	38782	9722	1.20673	1.41099			50	81603	29818	17521	1.10115	1.00164
	51	112167	32665	8714	1.40587	1.6663		51	142770	36290	11492	1.69708	1.60606		51	102790	34581	13266	1.11998	1.37973		51	94795	50996	9678	1.33622	1.85537			51	89970	45793	10015	1.21405	1.53827
	52	127842	28668	14728	1.60234	1.4624		52	95870	22191	12908	1.13959	0.982092		52	140810	50357	9437	1.53424	2.00916		52	77669	33382	12662	1.09481	1.21453			52	49297	26959	7703	0.665211	0.905601
	53	112772	22596	8959	1.41346	1.15266		53	60144	16156	9922	0.714919	0.715005		53	120550	39085	11868	1.31349	1.55943		53	69723	36844	12234	0.982806	1.34048			53	103632	58172	11288	1.3984	1.9541
	54	132283	30283	17667	1.658	1.54479		54	82607	17287	18295	0.981932	0.765059		54	147312	34992	12877	1.60509	1.39612		54	89421	36779	12082	1.26047	1.33812			54	103755	41781	9453	1.40006	1.4035
	55	102089	30888	8380	1.27956	1.57565		55	94569	26868	7993	1.12412	1.18908		55	100146	31577	10537	1.09117	1.25987		55	92099	17581	11681	1.29821	0.639644			55	86387	39216	12595	1.1657	1.31734
	56	110371	31117	9483	1.38336	1.58733		56	102792	29594	8257	1.22187	1.30972		56	94291	28836	14657	1.02738	1.15051		56	65611	29382	28516	0.924843	1.069			56	90747	20639	13766	1.22453	0.693301
	57	101953	33419	9872	1.27785	1.70476		57	96408	27572	8	1.14598	1.22023		57	127141	36171	13281	1.38531	1.44316		57	87322	39046	10851	1.23088	1.4206			57	111633	57500	20843	1.50637	1.93153
	58	159971	29330	8504	2.00504	1.49617		58	119300	29781	8094	1.41809	1.318		58	107317	43322	11624	1.16931	1.72848		58	114193	54782	12927	1.60965	1.99312			58	104256	53884	21058	1.40682	1.81006
	59	149564	37356	23335	1.8746	1.90559		59	89305	30892	8796	1.06155	1.36717		59	134530	34144	19931	1.46581	1.36229		59	96185	14279	10698	1.35581	0.519509			59	88746	31659	11498	1.19753	1.06348
	60	95741	29361	6068	1.19999	1.49775		60	75286	23060	7264	0.894909	1.02055		60	103184	35893	10763	1.12427	1.43207		60	77754	18278	9601	1.09601	0.665003			60	58417	25881	38107	0.788276	0.869389
	61	78442	23454	8626	0.983172	1.19643		61	62783	19775	5550	0.746288	0.875168		61	125848	34827	15536	1.37122	1.38954		61	69272	17854	6940	0.976448	0.649577			61	87153	49102	11599	1.17604	1.64942
	62	85904	27378	6489	1.0767	1.3966		62	55885	18318	5732	0.664293	0.810687		62	93119	24131	10006	1.01461	0.962788		62	96975	41517	20798	1.36695	1.5105			62	115772	42187	13938	1.56222	1.41714
	63	76575	6085	7144	0.959771	0.310406		63	85274	23650	6249	1.01363	1.04666		63	109271	25068	7805	1.1906	1.00017		63	103013	38567	17133	1.45206	1.40317			63	72543	36848	9417	0.978891	1.23779
	64	112514	20877	7921	1.41022	1.06497		64	59950	9822	18069	0.712613	0.434685		64	88123	23170	7581	0.960172	0.924446		64	104833	40061	20800	1.47771	1.45753			64	108808	40348	15448	1.46825	1.35536
	65	65945	14479	7307	0.826538	0.738598		65	72263	21438	5309	0.858975	0.948767		65	96967	20967	15746	1.05654	0.836549		65	110127	36266	14422	1.55233	1.31946			65	95356	29338	9847	1.28673	0.985516
	66	72996	28450	7992	0.914913	1.45128		66	125262	36984	9029	1.48896	1.63678		Average total	91778.3	25063.7					66	66179	31894	10146	0.93285	1.16039			66	70903	20864	10505	0.956761	0.700859
	67	66228	19544	9390	0.830085	0.996973		Average total	84127	22595.7					Avergae rest	110152	31723.4					67	55127	24371	10911	0.777062	0.886683			67	101495	35826	19661	1.36957	1.20346
	68	131790	38188	8915	1.65182	1.94803		Avergae rest	97858.1	28137.7					Average Trp63+	77613.4	20079.8					68	102938	43376	10095	1.451	1.57814			68	124804	39561	14432	1.6841	1.32893
	69	67104	20231	5507	0.841064	1.03202		Average Trp63+	69753	16428.5					# of Trp63	38						69	76848	36894	18848	1.08324	1.3423			69	89313	32575	19440	1.20518	1.09425
	70	69081	17041	7416	0.865843	0.86929		# of Trp63	35						% of Trp63	58.4615						70	91735	28761	14387	1.29308	1.0464			70	61791	29483	9055	0.833804	0.990387
	71	67571	17443	7025	0.846917	0.889797		% of Trp63	53.0303							Total	Trp63					71	63458	22346	8187	0.894495	0.813008			71	64995	13964	7615	0.877039	0.469076
	72	61897	17626	7333	0.775801	0.899132			Total	Trp63					% Sox2highSox21high	30.7692	5.26316					72	48828	29511	7994	0.688273	1.07369			72	90050	36895	15779	1.21513	1.23937
	73	78612	18290	6598	0.985302	0.933004		% Sox2highSox21high	33.3333	5.71429					% Sox2highSox21low	16.9231	15.7895					73	44123	17614	8591	0.621952	0.640845			73	99997	38540	14556	1.34935	1.29463
	74	63586	19986	7465	0.79697	1.01952		% Sox2highSox21low	6.06061	8.57143					% Sox2lowSox21high	3.07692	2.63158					74	57883	24422	7300	0.815911	0.888539			74	75605	20599	14930	1.02021	0.691958
	75	46853	13094	6200	0.587243	0.667947		% Sox2lowSox21high	3.0303	0					% Sox2lowSox21low	49.2308	76.3158					Average total	70942.8	27485.6						75	76565	32051	14963	1.03316	1.07665
	Average total	79784.6	19603.3					% Sox2lowSox21low	57.5758	85.7143					Total	100	100					Avergae rest	84913.7	32940.7						76	67731	31255	10802	0.913958	1.04991
	Avergae rest	93953.7	24927.2					Total	100	100												Average Trp63+	51557.4	19931.5						Average total	74107.3	29769.2
	Average Trp63+	65232.6	14135.6												Int S2 in S21_high	113534						# of Trp63	38							Avergae rest	86097.6	35676.5
	# of Trp63	37						Int S2 in S21_high	108808						Int S2 in S21_low	79666.2						% of Trp63	51.3514							Average Trp63+	56827.2	21181.1
	% of Trp63	49.3333						Int S2 in S21_low	68978.1														Total	Trp63						# of Trp63	37
		Total	Trp63												Int S21 in S2_high		30721.5					% Sox2highSox21high	25.6757	0						% of Trp63	48.6842
	% Sox2highSox21high	29.3333	2.7027					Int S21 in S2_high		30529.2					Int S21 in S2_low		19193.9					% Sox2highSox21low	8.10811	2.63158							Total	Trp63
	% Sox2highSox21low	8	13.5135					Int S21 in S2_low		16337.7												% Sox2lowSox21high	10.8108	5.26316						% Sox2highSox21high	34.2105	5.40541
	% Sox2lowSox21high	9.33333	2.7027														% of total	% of S2high	%ofS21high			% Sox2lowSox21low	55.4054	92.1053						% Sox2highSox21low	6.57895	5.40541
	% Sox2lowSox21low	53.3333	81.0811							% of total	% of S2high	%ofS21high			# of S2 high	31	47.6923	100				Total	100	100						% Sox2lowSox21high	7.89474	8.10811
	Total	100	100					# of S2 high	26	39.3939	100				# of S21high	22	33.8462		100											% Sox2lowSox21low	51.3158	81.0811
								# of S21high	24	36.3636		100			# of S2 high only	11	16.9231	35.4839				Int S2 in S21_high	88273.9							Total	100	100
	Int S2 in S21_high	102830						# of S2 high only	4	6.06061	15.3846				# of S21 high only	2	3.07692		9.09091			Int S2 in S21_low	52647
	Int S2 in S21_low	65256						# of S21 high only	2	3.0303		8.33333			# of S2 low	34	52.3077													Int S2 in S21_high	89981.7
								# of S2 low	40	60.6061					# of S21 low	43	66.1538					Int S21 in S2_high		35702.6						Int S2 in S21_low	58659.1
	Int S21 in S2_high		27479.4					# of S21 low	42	63.6364					# of S2highS21high	20	30.7692	64.5161	90.9091			Int S21 in S2_low		21442.8
	Int S21 in S2_low		13860.2					# of S2highS21high	22	33.3333	84.6154	91.6667												% of total	% of S2high	%ofS21high				Int S21 in S2_high		38070.1
																						# of S2 high	25	33.7838	100					Int S21 in S2_low		21617.1
									Sox2	Sox21	Sox2-n	Sox21-n				Sox2	Sox21	Sox2-n	Sox21-n			# of S21high	27	36.4865		100						% of total	% of S2high	%ofS21high
			% of total	% of S2high	%ofS21high			Lowest value	41700	9822	0.495679	0.434685			Lowest value	34500	10096	0.375906	0.402814			# of S2 high only	6	8.10811	24					# of S2 high	31	40.7895	100
	# of S2 high	28	37.3333	100				Highst value	154035	50743	1.83098	2.2457			Highst value	147312	50357	1.60509	2.00916			# of S21 high only	8	10.8108		29.6296				# of S21high	32	42.1053		100
	# of S21high	29	38.6667		100			Average	84127	22595.7					Average	91778.3	25063.7					# of S2 low	49	66.2162						# of S2 high only	5	6.57895	16.129
	# of S2 high only	6	8	21.4286																		# of S21 low	47	63.5135						# of S21 high only	6	7.89474		18.75
	# of S21 high only	7	9.33333		24.1379																	# of S2highS21high	19	25.6757	76	70.3704				# of S2 low	45	59.2105
	# of S2 low	47	62.6667																											# of S21 low	44	57.8947
	# of S21 low	46	61.3333																											# of S2highS21high	26	34.2105	83.871	81.25
	# of S2highS21high	22	29.3333	78.5714	75.8621																		Sox2	Sox21	Sox2-n	Sox21-n
																						Lowest value	31346	12370	0.441849	0.450054					Sox2	Sox21	Sox2-n	Sox21-n
																						Highst value	129935	54782	1.83155	1.99312				Lowest value	28699	10847	0.387263	0.36437
		Sox2	Sox21	Sox2-n	Sox21-n																	Average	70942.8	27485.6						Highst value	124804	58172	1.6841	1.9541
	Lowest value	32363	6085	0.405629	0.310406																									Average	74107.3	29769.2
	Highst value	159971	38188	2.00504	1.94803
	Average	79784.6	19603.3

## Sheet: Fig 4C Exp2_Foxj1
	1						2								3						4						5
		Sox2	Sox21	Foxj1				Sox2	Sox21	Foxj1	Sox2-n	Sox21-n				Sox2	Sox21	Foxj1				Sox2	Sox21	Foxj1				Sox2	Sox21	Foxj1
	1	121814	24255	25873			1	103556	21569	25708	1.74494	1.19945			1	88836	24507	30828			1	50248	17730	30			1	61366	25737	28299				Exp 2
	2	89410	24263	28154			2	45843	14084	13337	0.772464	0.78321			2	70117	24158	24517			2	71335	28749	26940			2	67978	27724	45627				Average total	52138.4	19858.4
	3	97535	26869	27498			3	98868	26144	24024	1.66595	1.45386			3	64079	26708	24494			3	63776	35084	30598			3	68317	32122	36693				Avergae rest	45713.1	18505.8
	4	94300	24647	22688			4	120399	34700	32282	2.02875	1.92966			4	87186	27805	33124			4	64958	33311	30412			4	67898	28302	43133				Average Foxj1+	79773.8	25692.9
	5	114904	37825	17342			5	115992	28840	27143	1.95449	1.60379			5	84754	32193	28298			5	82368	44216	29840			5	57530	25061	32902				# of Foxj1	15.8
	6	88122	14490	23864			6	98327	21905	27106	1.65683	1.21813			6	73198	26927	20021			6	62618	31763	28842			6	63841	26364	39795				% of Foxj1	23.0554
	7	135731	36930	32497			7	136422	32739	30634	2.29874	1.82061			7	85271	30701	27766			7	76461	36401	44401			7	54672	20500	34734					Total	Foxj1
	8	110612	38633	25490			8	112314	12299	26634	1.89251	0.683946			8	104493	43138	30257			8	69445	24328	35086			8	46439	23121	26252				% Sox2highSox21high	37.3455	82.8889
	9	128074	27142	34398			9	94074	26820	22943	1.58517	1.49146			9	72269	25600	27254			9	50879	18970	25015			9	55280	26942	35527				% Sox2highSox21low	7.40221	12.8889
	10	110222	28537	28494			10	110642	32401	30854	1.86434	1.80182			10	89747	38644	29315			10	57267	22767	21895			10	37651	15418	19832				% Sox2lowSox21high	8.10674	1.11111
	11	117050	22589	32383			11	75093	19649	22492	1.26533	1.09268			11	89767	19491	32526			11	81164	27879	30304			11	30993	10704	2283				% Sox2lowSox21low	47.1456	3.11111
	12	121075	34506	29131			12	88580	20051	26688	1.49259	1.11503			12	73047	24818	26159			12	67251	29322	25235			12	43308	19560	4084				Total	100	100
	13	85372	5302	19608			13	103740	25286	33935	1.74804	1.40615			13	84307	26228	34520			13	65656	32773	34935			13	24755	6294	2135
	14	93403	18718	24145			14	87951	24753	24864	1.48199	1.37651			14	53453	11736	23472			14	45400	25967	27413			14	43011	10134	2992				Int S2 in S21_high	70779.2
	15	77227	13289	23688			15	108551	22854	31184	1.82911	1.27091			15	75433	22488	34494			15	66805	25169	18093			15	29724	13833	2282				Int S2 in S21_low	39905.5
	16	59451	17972	18			16	64422	7742	14703	1.08552	0.430532			16	63993	18399	26680			16	56193	31513	28587			16	22887	8113	2606
	17	41024	12049	2488			17	61956	17404	16390	1.04397	0.967835			17	70358	30379	22053			17	50819	25343	26781			17	35211	20754	2629				Int S21 in S2_high		26025.5
	18	29714	11460	3587			18	58380	18798	12783	0.983715	1.04535			18	80717	30558	31875			18	53293	22641	11116			18	31917	18817	2400				Int S21 in S2_low		15124.9
	19	47043	15070	2176			19	69912	21569	3331	1.17803	1.19945			19	49308	14985	16400			19	33392	20958	3596			19	63902	34348	3582						% of total	% of S2high	%ofS21high
	20	83119	17390	3297			20	28698	11326	2895	0.483567	0.629838			20	47485	16121	15630			20	20618	9683	2756			20	61811	31744	3756				# of S2 high	30.4	44.3905	100
	21	69661	15612	2678			21	41921	20629	3657	0.706377	1.14718			21	34044	18811	4189			21	31800	21933	3044			21	30658	15644	2507				# of S21high	30.6	44.6803		100
	22	49571	10152	3411			22	44287	17806	4500	0.746245	0.99019			22	25115	10346	3712			22	31512	18939	3195			22	32569	17593	3260				# of S2 high only	5	7.40221	16.6012
	23	67417	17196	4049			23	56248	19966	2869	0.94779	1.11031			23	46906	28906	2646			23	53483	27814	3731			23	45489	23132	3230				# of S21 high only	5.4	8.10674		18.2562
	24	50238	9365	3730			24	47096	16957	4819	0.793577	0.942977			24	68951	32631	3864			24	68246	35412	4167			24	31183	15100	2717				# of S2 low	38.2	55.6095
	25	56557	12349	5799			25	33407	10537	3317	0.562915	0.585961			25	32005	17508	4503			25	84708	51396	4415			25	38833	12771	4302				# of S21 low	37.8	55.0494
	26	72680	20686	4285			26	32762	11396	5337	0.552046	0.63373			26	41680	20019	5670			26	31907	17337	3140			26	32789	19972	4324				# of S2highS21high	25.4	36.9883	83.3988	82.7725
	27	43829	10537	2561			27	29386	12693	3485	0.49516	0.705856			27	23418	11418	3091			27	45571	21857	3321			27	72062	53954	4546
	28	72839	33172	2270			28	73111	27874	4548	1.23194	1.55007			28	36283	17883	3750			28	29978	14511	3511			28	39636	18527	4442
	29	72450	21514	2193			29	26571	10078	2597	0.447727	0.560436			29	22223	13845	2835			29	49333	34333	3395			29	37976	14609	9941
	30	54991	11420	3455			30	81766	23383	5596	1.37777	1.30033			30	71346	40579	3206			30	41682	24847	3471			30	57147	25632	3566				AVERAGE	Sox2	Sox21	Sox2-n	Sox21-n
	31	60213	20157	2449			31	74333	26038	3923	1.25253	1.44797			31	85720	28552	4552			31	76608	37545	4818			31	32266	16625	3367				Lowest value	20688.4	15047	0.476879	0.386212
	32	50772	14327	2881			32	43121	13364	2674	0.726598	0.743171			32	17633	11211	3275			32	40716	21517	3440			32	63719	42347	4				Highst value	106683	36346.8	2.38619	2.60527
	33	82531	19730	2673			33	35981	10735	3703	0.606287	0.596972			33	31289	14868	3754			33	37491	25038	2981			33	64316	32702	4088				Average	46115.3	17556.8
	34	63610	19837	2532			34	52422	15560	4385	0.883321	0.86529			34	30646	13769	3738			34	28915	13573	2512			34	27253	13933	3140
	35	81933	7659	2615			35	93953	33760	3496	1.58313	1.87739			35	34824	12706	5779			35	24771	16257	5043			35	40685	22039	3858				MIN MAX overall	Sox2-n	Sox21-n
	36	68650	21078	3612			36	48884	19083	3347	0.823705	1.0612			36	29374	18293	3301			36	40965	28421	3947			36	35026	18071	8697				Lowest value	0.340385	0.236269
	37	55523	19614	2773			37	53210	17383	3111	0.896599	0.966667			37	47415	27271	3814			37	27655	23362	6759			37	33242	17308	3167				Highst value	3.32683	3.2843
	38	84193	27241	3246			38	46044	14473	3704	0.775851	0.804842			38	41875	24027	3420			38	52196	9429	8804			38	29641	20679	3359				Average
	39	64895	21303	2566			39	45225	13820	4468	0.762051	0.768529			39	24891	17641	3304			39	28031	15439	4255			39	56177	21161	3516
	40	57245	17210	2799			40	98788	37653	3071	1.6646	2.09388			40	57226	27108	4591			40	55239	31097	4201			40	32440	19524	3333
	41	73580	21739	2832			41	74902	24532	2590	1.26211	1.36422			41	36487	16875	6450			41	58490	38180	5630			41	53412	29926	3222
	42	67481	25123	3605			42	60195	21273	3377	1.0143	1.18299			42	32417	19143	2893			42	21155	18603	3207			42	59110	33134	3575
	43	53833	17900	2883			43	52517	14299	2471	0.884922	0.795166			43	49471	21212	6663			43	23254	17729	3373			43	36218	12916	2916
	44	51521	12712	2849			44	69562	19219	3547	1.17213	1.06877			44	36991	18991	3357			44	30525	19574	3246			44	30739	16719	5176
	45	63341	24568	2989			45	40390	13805	2866	0.68058	0.767695			45	38048	21298	3327			45	58852	37258	5039			45	32876	16957	2833
	46	41157	9020	2294			46	51644	17811	4633	0.870212	0.990468			46	54580	26051	3572			46	44177	18152	4304			46	53308	21165	4319
	47	45870	8412	1824			47	49167	15321	2482	0.828474	0.851999			47	34208	11570	3839			47	83393	32910	4344			47	48069	25506	3425
	48	40323	13808	3615			48	55274	16177	2629	0.931378	0.899601			48	36103	15016	2897			48	43873	27275	4803			48	32640	17180	2694
	49	35918	7623	2574			49	60529	18975	4019	1.01993	1.0552			49	67917	25380	3537			49	58701	27058	4299			49	29589	13927	2944
	50	36070	11500	2054			50	45021	11361	2825	0.758613	0.631784			50	52016	23039	4266			50	32874	15667	4057			50	26913	11268	3008
	51	70562	19375	2443			51	78043	17063	3593	1.31504	0.948872			51	58833	25176	3990			51	34724	18707	4846			51	26730	15839	3109
	52	54270	19377	2384			52	55396	12132	2538	0.933434	0.674659			52	54539	20452	7643			52	42585	21869	3008			52	20787	11943	2656
	53	31229	11214	1943			53	50789	16752	2257	0.855805	0.931577			53	42194	11286	3			53	71628	34620	4550			53	30291	11518	3489
	54	45743	16514	2294			54	82240	31191	3186	1.38576	1.73453			54	40846	14228	5287			54	35356	20822	4022			54	30692	18895	3163
	55	24973	8007	1973			55	44830	13744	2439	0.755395	0.764302			55	39731	14154	4029			55	39459	16376	4578			55	39057	30125	3358
	56	43817	13024	2707			56	65059	21478	3449	1.09626	1.19439			56	53465	18310	2930			56	24678	8356	3119			56	24166	14798	2358
	Average total	69726.6	18607.3				57	76760	27659	3341	1.29342	1.53811			57	34969	16625	2492			57	34761	11014	4594			57	31562	17962	2908
	Avergae rest	56581.4	16195.5				58	54902	14348	3765	0.92511	0.797891			58	59915	25376	2906			58	41215	22387	4355			58	38602	26939	3015
	Average Foxj1+	105657	25199.7				59	49419	15846	5624	0.83272	0.881194			59	47242	23212	2894			59	56071	29619	4036			59	23322	15322	2289
	# of Foxj1	15					60	66841	17389	2292	1.12628	0.967			60	26791	8547	4535			60	47172	21810	3440			60	27030	15963	2858
	% of Foxj1	26.7857					61	34092	12918	2235	0.574457	0.718369			61	41720	12402	6549			61	36030	13740	2770			61	24176	11436	2548
		Total	Foxj1				62	32608	10908	2923	0.549451	0.606593			62	50136	24592	3107			62	62711	24798	3807			Average total	38178.4	19887.2
	% Sox2highSox21high	33.9286	80				63	40007	17576	3676	0.674126	0.977399			63	32267	14107	3247			63	67907	30925	5299			Avergae rest	38037.5	19707.1
	% Sox2highSox21low	8.92857	20				64	36606	15141	2887	0.616819	0.841989			64	41018	15018	5400			64	45963	21827	3636			Average Foxj1+	58097.2	25129.1
	% Sox2lowSox21high	14.2857	0				65	42393	9518	3455	0.714331	0.529295			65	45835	18176	5400			65	31412	16342	3298			# of Foxj1	10
	% Sox2lowSox21low	42.8571	0				66	22201	7435	2037	0.374091	0.41346			66	30917	8789	2895			66	31054	16054	3576			% of Foxj1	16.3934
	Total	100	100				67	47851	15453	2404	0.806299	0.85934			67	22060	6978	2209			67	41893	20357	4054				Total	Foxj1
							68	20333	8406	1875	0.342615	0.467457			68	48109	19727	2477			68	30095	16973	7757			% Sox2highSox21high	39.3443	90
	Int S2 in S21_high	87442.5					69	20005	8283	2046	0.337088	0.460617			69	32357	12258	2835			69	53596	23044	3419			% Sox2highSox21low	6.55738	0
	Int S2 in S21_low	53232.4					Average total	59346.5	17982.4						70	32333	10806	4817			70	28940	17054	3042			% Sox2lowSox21high	4.91803	0
							Avergae rest	51700	17099.9						71	20824	8118	4451			71	25520	12740	5360			% Sox2lowSox21low	49.1803	10
	Int S21 in S2_high		23604.2				Average Foxj1+	93617.2	22668.8						72	36402	15609	5337			72	22147	12512	3535			Total	100	100
	Int S21 in S2_low		14422.7				# of Foxj1	18							73	55822	24185	3599			73	21991	10991	3920
							% of Foxj1	26.087							74	23733	12767	2523			74	30900	13400	3446			Int S2 in S21_high	54585.6
								Total	Foxj1						75	24822	4808	2973			Average total	43324	22465.3				Int S2 in S21_low	31266.4
			% of total	% of S2high	%ofS21high		% Sox2highSox21high	37.6812	72.2222						76	18714	7698	2444			Avergae rest	41927.1	21954.3
	# of S2 high	23	41.0714	100			% Sox2highSox21low	7.24638	16.6667						77	46929	17723	3234			Average Foxj1+	63107.6	28551.4				Int S21 in S2_high		26605.4
	# of S21high	25	44.6429		100		% Sox2lowSox21high	8.69565	5.55556						78	17401	8612	2041			# of Foxj1	18					Int S21 in S2_low		15322.2
	# of S2 high only	5	8.92857	21.7391			% Sox2lowSox21low	46.3768	5.55556						79	37250	13115	2865			% of Foxj1	24.3243							% of total	% of S2high	%ofS21high
	# of S21 high only	8	14.2857		32		Total	100	100						80	17059	8088	2157				Total	Foxj1				# of S2 high	28	45.9016	100
	# of S2 low	33	58.9286												81	22429	11694	1816			% Sox2highSox21high	43.2432	88.8889				# of S21high	26	42.623		100
	# of S21 low	31	55.3571				Int S2 in S21_high	84138							82	25759	14103	2931			% Sox2highSox21low	9.45946	11.1111				# of S2 high only	4	6.55738	14.2857
	# of S2highS21high	18	32.1429	78.2609	72		Int S2 in S21_low	45868.7							83	29992	12575	3458			% Sox2lowSox21high	5.40541	0				# of S21 high only	3	4.91803		11.5385
															Average total	50116.8	20349.7				% Sox2lowSox21low	41.8919	0				# of S2 low	33	54.0984
							Int S21 in S2_high		24397.1						Avergae rest	40319.1	17572				Total	100	100				# of S21 low	35	57.377
							Int S21 in S2_low		14103.2						Average Foxj1+	78390.3	26915.4										# of S2highS21high	24	39.3443	85.7143	92.3077
		Sox2	Sox21	Sox2-n	Sox21-n										# of Foxj1	18					Int S2 in S21_high	60706.7
	Lowest value	24973	5302	0.358156	0.284941				% of total	% of S2high	%ofS21high				% of Foxj1	21.6867					Int S2 in S21_low	34168.8						Sox2	Sox21	Sox2-n	Sox21-n
	Highst value	135731	38633	1.94662	2.07622		# of S2 high	31	44.9275	100						Total	Foxj1										Lowest value	20787	6294	0.54447	0.316486
	Average	69726.6	18607.3				# of S21high	32	46.3768		100				% Sox2highSox21high	32.5301	83.3333				Int S21 in S2_high		28878.3				Highst value	72062	53954	1.88751	2.71301
							# of S2 high only	5	7.24638	16.129					% Sox2highSox21low	4.81928	16.6667				Int S21 in S2_low		16873.4				Average	38178.4	19887.2
							# of S21 high only	6	8.69565		18.75				% Sox2lowSox21high	7.22892	0							% of S2high	%ofS21high
							# of S2 low	38	55.0725						% Sox2lowSox21low	55.4217	0				# of S2 high	39	52.7027	100
							# of S21 low	37	53.6232						Total	100	100				# of S21high	37	50		100
							# of S2highS21high	26	37.6812	83.871	81.25										# of S2 high only	7	9.45946	17.9487
															Int S2 in S21_high	67023.3					# of S21 high only	4	5.40541		10.8108
								Sox2	Sox21	Sox2-n	Sox21-n				Int S2 in S21_low	34991.3					# of S2 low	35	47.2973
							Lowest value	20005	7435	0.487848	0.559399										# of S21 low	36	48.6486
							Highst value	136422	37653	3.32683	2.83296				Int S21 in S2_high		26642.2				# of S2highS21high	32	43.2432	82.0513	86.4865
							Average	41006.7	13291.1						Int S21 in S2_low		14903
																						Sox2	Sox21	Sox2-n	Sox21-n
																	% of total	% of S2high	%ofS21high		Lowest value	20618	8356	0.653539	0.533964
															# of S2 high	31	37.3494	100			Highst value	84708	51396	2.68503	3.2843
															# of S21high	33	39.759		100		Average	31548.2	15649
															# of S2 high only	4	4.81928	12.9032
															# of S21 high only	6	7.22892		18.1818
															# of S2 low	52	62.6506
															# of S21 low	50	60.241
															# of S2highS21high	27	32.5301	87.0968	81.8182
																Sox2	Sox21	Sox2-n	Sox21-n
															Lowest value	17059	4808	0.340385	0.236269
															Highst value	104493	43138	2.08499	2.11984
															Average	50116.8	20349.7

## Sheet: Fig 4C Exp3_P63
			Intensity measurements		1								2							3							4							5
						Trp63	Sox2	Sox21	Sox2-n	Sox21-n				Trp63	Sox2	Sox21	Sox2-n	Sox21-n			Trp63	Sox2	Sox21	Sox2-n	Sox21-n			Trp63	Sox2	Sox21	Sox2-n	Sox21-n			Trp63	Sox2	Sox21	Sox2-n	Sox21-n
					1	19348	35658	9262	0.732896	0.80056			1	32214	40286	9082	0.70354	0.747496		1	20799	39994	11075	0.725838	0.771511		1	23892	42631	11780	0.705081	0.887083		1	18906	38490	5869	0.595928	0.474018
					2	22198	48383	10434	0.99444	0.901862			2	42870	31139	7504	0.5438	0.617619		2	22129	34242	9747	0.621447	0.678999		2	26174	32337	10455	0.534827	0.787305		2	20292	43783	8885	0.677878	0.71761
					3	43025	33863	8553	0.696003	0.739278			3	34618	47039	6342	0.821472	0.52198		3	28713	39503	10601	0.716927	0.738491		3	31518	27949	9234	0.462253	0.695358		3	21979	38804	13773	0.60079	1.1124
					4	35938	47732	12214	0.981059	1.05572			4	32917	35333	6271	0.617043	0.516136		4	19129	36345	9828	0.659613	0.684642		4	48694	67171	18514	1.11095	1.39418		4	28523	52675	10107	0.81555	0.816307
					5	47177	48774	14469	1.00248	1.25063			5	40347	33411	12021	0.583477	0.989392		5	30	22859	7694	0.41486	0.535982		5	44424	37727	13525	0.623973	1.01849		5	41462	63065	12249	0.976415	0.989308
					6	50994	42969	11894	0.883163	1.02806			6	39988	41226	11988	0.719956	0.986676		6	51636	41439	8765	0.752063	0.610591		6	27861	47171	14743	0.780168	1.11021		6	47746	60418	8552	0.935433	0.690715
					7	39350	29971	6932	0.616009	0.599167			7	43415	32186	10390	0.562085	0.855152		7	26653	30102	11525	0.546311	0.802859		7	33158	53079	15224	0.877882	1.14643		7	41526	60309	8362	0.933745	0.675369
					8	36094	48815	10764	1.00332	0.930386			8	46634	48473	16204	0.846515	1.33367		8	50562	37317	9683	0.677254	0.674541		8	45495	43796	14263	0.724349	1.07406		8	30217	44964	11175	0.696163	0.902565
					9	52207	51890	10917	1.06652	0.94361			9	52743	37239	12142	0.650328	0.999351		9	42135	38750	9802	0.703261	0.682831		9	43578	50127	11520	0.829058	0.867503		9	25006	29652	7571	0.459093	0.611483
					10	58184	59073	15464	1.21416	1.33663			10	47687	38722	11313	0.676227	0.93112		10	58414	37743	11100	0.684985	0.773253		10	30640	37660	8470	0.622864	0.637826		10	49762	30710	10779	0.475473	0.870582
					11	59677	40090	11368	0.823989	0.982592			11	56630	44043	8674	0.769151	0.713916		11	37491	27140	7263	0.492555	0.505958		11	35438	39808	8795	0.658391	0.6623		11	37646	30005	8312	0.464558	0.671331
					12	53664	52552	9392	1.08013	0.811797			12	52611	61778	14306	1.07887	1.17746		12	41643	26268	8464	0.476729	0.589622		12	41231	32991	7241	0.545643	0.545277		12	24384	18275	6399	0.282946	0.516825
					13	60327	51206	12036	1.05246	1.04033			13	53856	57590	12065	1.00573	0.993013		13	42754	31918	8910	0.579269	0.620692		13	22883	63901	15180	1.05687	1.14312		13	63453	46870	12186	0.725673	0.98422
					14	58534	41151	7466	0.845797	0.645323			14	57458	37071	7981	0.647394	0.656878		14	48446	25523	7331	0.463209	0.510695		14	27950	30180	7030	0.499152	0.529388		14	33250	30535	10028	0.472764	0.809926
					15	46657	37786	9507	0.776634	0.821737			15	64777	43454	8815	0.758865	0.725521		15	42872	52835	16530	0.958885	1.15152		15	33136	39152	11030	0.647541	0.830604		15	59122	37452	11888	0.579857	0.960152
					16	35952	46722	8651	0.9603	0.747749			16	34458	62524	11048	1.0919	0.909309		16	35342	33550	8333	0.608888	0.580497		16	27464	33393	8232	0.552292	0.619904		16	44669	46068	12525	0.713256	1.0116			Exp 3
					17	52223	37620	8402	0.773222	0.726226			17	35761	64761	13716	1.13096	1.1289		17	43159	44243	13495	0.802952	0.940094		17	26569	20722	6194	0.342724	0.466434		17	54816	44552	9853	0.689785	0.795792					Int Sox2	Int Sox21	Sox2-n	Sox21-n
					18	46985	39338	10292	0.808533	0.889588			18	58991	41722	7017	0.728618	0.577536		18	65431	29081	8837	0.527781	0.615607		18	41368	29018	9561	0.479933	0.719983		18	35758	24968	6616	0.386572	0.534351			Average total		57213.3	12747	1	1
					19	31124	26419	6933	0.543003	0.599253			19	38340	40251	9786	0.702929	0.805439		19	53299	57532	16156	1.04413	1.12547		19	27988	22025	5926	0.364275	0.446252		19	45	29884	7171	0.462685	0.579176			Avergae rest		72224.9	14772.9	1.26238	1.15893
					20	27568	28168	8768	0.578951	0.757861			20	33601	37021	7042	0.646521	0.579594		20	45159	41925	10383	0.760883	0.723305		20	28706	47252	13573	0.781508	1.0221		20	38542	33281	9156	0.515279	0.739498			Average Trp63+		42185.9	10702.1	0.737344	0.83958
					21	36706	26250	10962	0.539529	0.9475			21	45346	61528	16987	1.0745	1.39812		21	36172	37931	12293	0.688397	0.85636		21	28371	26978	7910	0.446193	0.595656		21	39673	39102	10735	0.605404	0.867028			# of Trp63	34.6
					22	45068	26074	12193	0.535912	1.0539			22	39580	56545	11750	0.987481	0.967087		22	44089	33137	12347	0.601392	0.860122		22	30902	56885	12984	0.94083	0.977749		22	33715	30839	5538	0.47747	0.447285			% of Trp63	50.754
					23	30194	32786	10173	0.673867	0.879303			23	38032	58021	11298	1.01326	0.929885		23	33325	18851	9842	0.342121	0.685617		23	40486	32708	9931	0.540963	0.747845		23	53914	33267	6676	0.515062	0.539197				Total	Trp63
					24	24377	21525	10287	0.442414	0.889156			24	33636	56164	7800	0.980828	0.641981		24	36159	23648	8636	0.42918	0.601604		24	52769	39615	13740	0.655198	1.03468		24	65045	42682	11182	0.660832	0.90313			% Sox2highSox21high	33.0649	4.52444
					25	30114	24023	11443	0.493757	0.989075			25	40925	31445	7082	0.549144	0.582886		25	42575	23908	9767	0.433898	0.680393		25	32876	26099	9243	0.431655	0.696036		25	68134	44134	12679	0.683313	1.02404			% Sox2highSox21low	6.44517	2.95826
					26	31074	19747	6883	0.40587	0.594932			26	44057	31885	8908	0.556828	0.733175		26	49138	52789	14725	0.95805	1.02578		26	46551	29712	9466	0.491411	0.712829		26	37711	37737	11395	0.58427	0.920334			% Sox2lowSox21high	8.19372	9.44294
					27	21920	26640	8424	0.547545	0.728128			27	39902	40598	7717	0.708989	0.63515		27	37830	35302	10434	0.640684	0.726857		27	32341	36963	12549	0.611337	0.944991		27	29515	34826	7462	0.5392	0.602679			% Sox2lowSox21low	52.2962	83.0744
					28	27934	18245	6425	0.374998	0.555344			28	30034	30932	8127	0.540185	0.668895		28	37354	29024	9695	0.526747	0.675377		28	34961	33848	11216	0.559817	0.844611		28	28645	41586	10187	0.643863	0.822768			Total	100	100
					29	16654	22281	6470	0.457952	0.559234			29	40169	23647	9941	0.412963	0.818197		29	33896	24256	8448	0.440214	0.588508		29	27134	26342	7114	0.435674	0.535714		29	39715	54538	9618	0.844395	0.776812				Int	Int Norm
					30	13780	24478	6717	0.503108	0.580583			30	29684	22380	7013	0.390836	0.577207		30	35989	26596	11933	0.482682	0.831281		30	28086	18597	5590	0.307579	0.42095		30	24180	35438	6836	0.548675	0.552119			Int S2 in S21_high	80653.7	1.4097
					31	22932	20175	4767	0.414667	0.412035			31	29609	25299	8034	0.441812	0.661241		31	29654	30865	11487	0.560159	0.800212		31	27427	28600	10936	0.47302	0.823526		31	6609	65149	12322	1.00868	0.995204			Int S2 in S21_low	40095.6	0.700809
					32	11253	84353	8893	1.73375	0.768666			32	43713	27147	6537	0.474085	0.53803		32	22145	28238	12576	0.512482	0.876074		32	39605	29803	9408	0.492916	0.708461		32	16005	87995	18371	1.3624	1.48376					Int	Int Norm
					33	11911	103071	23757	2.11847	2.05343			33	26250	39766	11906	0.694459	0.979927		33	23443	27847	11786	0.505386	0.821041		33	26703	25848	8376	0.427504	0.630747		33	5256	82180	21338	1.27237	1.72339			Int S21 in S2_high		16977.5	1.33188
					34	14176	87994	20365	1.80858	1.76025			34	30879	19630	6745	0.342811	0.555149		34	22315	17793	6793	0.322919	0.473217		34	57147	51721	11659	0.855421	0.877971		34	9832	57112	8413	0.884247	0.679488			Int S21 in S2_low		9973.99	0.782457
					35	17850	82114	15493	1.68773	1.33914			35	36685	23256	6911	0.406134	0.568812		35	33429	26818	10471	0.486711	0.729435		35	41087	29571	9548	0.489079	0.719004		35	14876	98029	14829	1.51775	1.19769
					36	10421	80992	15202	1.66467	1.31398			36	23465	28218	7178	0.492789	0.590787		36	24590	25731	10365	0.466983	0.722051		36	49655	37067	11849	0.613057	0.892279		36	5598	89033	13959	1.37847	1.12742
					37	6734	66922	20344	1.37548	1.75843			37	24852	36133	10933	0.631014	0.899844		37	33496	26380	9132	0.478762	0.636157		37	42224	30500	13143	0.504444	0.989722		37	22028	103440	11887	1.60153	0.960071					% of total	% of S2high	%ofS21high
					38	6471	87894	19413	1.80653	1.67796			38	25368	46368	10447	0.809754	0.859843		38	7475	55352	17720	1.00457	1.23442		38	25919	43081	11909	0.712523	0.896797		38	10215	99320	17436	1.53774	1.40824			# of S2 high	27.4	39.5101	100
					39	8924	80152	17167	1.6474	1.48383			39	13686	69098	16608	1.2067	1.36693		39	7589	65835	17722	1.19482	1.23456		39	22850	46083	8624	0.762174	0.649423		39	4151	71318	12899	1.10419	1.04181			# of S21high	29.4	42.3545		100
					40	6289	52970	15511	1.08872	1.34069			40	14372	82051	14321	1.43291	1.17869		40	7040	47849	12183	0.868396	0.848697		40	7778	79453	16598	1.31409	1.2499		40	7462	71892	17385	1.11308	1.40412			# of S2 high only	4.4	6.44517	16.3633
					41	6876	82302	15124	1.69159	1.30724			41	18780	62610	10355	1.0934	0.852271		41	5609	57870	10326	1.05026	0.719334		41	16639	119933	14513	1.98359	1.09289		41	5862	53977	13723	0.835709	1.10836			# of S21 high only	5.6	8.19372		19.3546
					42	20136	41114	8318	0.845036	0.718966			42	8859	102690	22489	1.79334	1.85096		42	4604	77851	21584	1.41289	1.50359		42	6765	75066	11910	1.24153	0.896872		42	10682	90836	15445	1.40639	1.24744			# of S2 low	46.2	68.0761
					43	6637	76061	16581	1.56332	1.43318			43	10031	112352	24026	1.96207	1.97747		43	13596	127873	27608	2.32072	1.92324		43	3918	65531	7796	1.08383	0.587071		43	20619	145137	18735	2.24711	1.51316			# of S21 low	39.8	57.6455
					44	12197	95167	10667	1.95601	0.922001			44	18821	89339	17458	1.56018	1.43689		44	4114	54795	18966	0.994456	1.32122		44	28432	70541	16252	1.16669	1.22384		44	26115	93699	13735	1.45071	1.10933			# of S2highS21high	23	33.0649	83.6367	78.2212
					45	7202	60857	13872	1.25082	1.19903			45	22864	50555	11409	0.882874	0.939021		45	4667	66097	27278	1.19957	1.90025		45	24911	51311	12267	0.84864	0.923756		45	20622	129439	27286	2.00406	2.20379
					46	7648	79448	16531	1.63293	1.42886			46	28477	63659	15676	1.11172	1.29022		46	5932	95816	29718	1.73893	2.07023		46	6270	130472	29404	2.1579	2.21424		46	20681	126127	17940	1.95278	1.44895			AVERAGE	Sox2	Sox21	Sox2-n	Sox21-n
					47	10167	61833	14292	1.27088	1.23533			47	10952	88984	14167	1.55398	1.16602		47	19386	55171	8686	1.00128	0.605088		47	6960	120880	27240	1.99925	2.05128		47	22039	124264	27762	1.92394	2.24224			Lowest value	18508	5445.6	0.326251	0.427398
					48	6902	61275	6882	1.25942	0.594845			48	18346	92415	17063	1.6139	1.40437		48	7353	74480	15273	1.35171	1.06395		48	7629	130181	20905	2.15308	1.57423		48	16270	88496	14972	1.37016	1.20924			Highst value	129432	29404.4	2.38156	2.29678
					49	7058	43594	13022	0.896009	1.12556			49	16195	124270	11738	2.17021	0.966099		49	15472	104391	15814	1.89456	1.10164		49	5417	113849	24135	1.88297	1.81746		49	11227	108826	24924	1.68492	2.01302			Average	57213.3	12747
					50	7447	40371	13098	0.829765	1.13212			50	8991	90269	16093	1.57642	1.32454		50	18811	88899	16633	1.6134	1.15869		50	9713	98021	4185	1.62118	0.315148		50	18630	110537	14713	1.71141	1.18832
					51	3293	57172	13862	1.17508	1.19816			51	9198	85347	14762	1.49047	1.21499		51	10279	102884	22291	1.86721	1.55284		51	6946	87574	18730	1.4484	1.41045		51	19699	109259	21583	1.69162	1.74318			MIN MAX overall	Sox2-n	Sox21-n
					52	3515	55278	13608	1.13616	1.17621			52	17571	119473	26337	2.08643	2.16767		52	8626	75480	13205	1.36986	0.919892		52	12847	130233	22290	2.15394	1.67853		52	26487	50213	10300	0.777432	0.831894			Lowest value	0.282946	0.315148
					53	3597	43325	11214	0.89048	0.969281			53	5561	62087	12434	1.08426	1.02338		53	16983	93160	19840	1.69073	1.3821		53	8101	104658	21608	1.73095	1.62717		53	12656	94810	14882	1.46791	1.20197			Highst value	2.63404	2.54881
					54	5912	42936	9976	0.882485	0.862275			54	6486	61086	14886	1.06678	1.2252		54	7716	89170	19803	1.61832	1.37952		54	9799	85784	13669	1.41879	1.02933		54	9813	70947	9920	1.09845	0.801203			Average
					55	4201	46479	11450	0.955306	0.98968			55	7385	100407	15652	1.75347	1.28824		55	9418	64945	19308	1.17867	1.34504		55	8759	126684	13218	2.09525	0.99537		55	9797	89360	13096	1.38353	1.05772
					56	4591	43769	10444	0.899606	0.902726			56	16899	79682	15054	1.39154	1.23902		56	14417	107859	23487	1.9575	1.63616		56	17027	127045	21418	2.10122	1.61286		56	18100	97749	16717	1.51342	1.35017
					57	1591	29567	9551	0.607705	0.82554			57	22500	45821	9077	0.800201	0.747085		57	16316	144209	18160	2.6172	1.26507		57	17748	87986	15538	1.45521	1.17008		57	12820	113026	18163	1.74995	1.46696
					58	1840	24491	7926	0.503376	0.685083			58	15215	62169	14185	1.0857	1.1675		58	16439	88925	19732	1.61387	1.37458		58	11713	117338	29934	1.94067	2.25415		58	16639	92833	17183	1.4373	1.38781
					Average total		48653.5	11569.4					59	7977	89240	13132	1.55845	1.08083		59	14622	125083	21156	2.27009	1.47378		59	10017	129624	20323	2.14387	1.53041		59	6	60775	10616	0.94096	0.857417
					Avergae rest		36750	9895.79					60	8273	83311	18061	1.45491	1.48652		60	5849	124340	30113	2.25661	2.09774		60	10258	113358	20179	1.87485	1.51956		60	5984	55302	9389	0.856223	0.758316
					Average Trp63+		60557	13243					61	16520	103540	15613	1.80818	1.28503		61	6510	66342	16745	1.20402	1.1665		61	14689	59697	14134	0.987338	1.06435		61	5995	70155	12440	1.08619	1.00473
					# of Trp63	29							62	6612	57359	10951	1.0017	0.901325		62	7696	112196	36588	2.03621	2.54881		62	12386	105661	20234	1.74754	1.5237		62	4867	48513	6876	0.751111	0.55535
					% of Trp63	50							63	6750	57079	11507	0.996807	0.947087		63	8170	66193	16574	1.20131	1.15458		63	3456	58648	16248	0.969988	1.22354		63	8426	59147	7705	0.915754	0.622305
						Total	Trp63						64	5761	109717	28981	1.91606	2.38529		64	15698	95446	18921	1.73222	1.31808		64	5495	84404	13908	1.39597	1.04733		64	10890	58331	6839	0.90312	0.552362
					% Sox2highSox21high	29.3103	6.89655						65	16465	53743	13436	0.938548	1.10585		65	7028	75890	16945	1.3773	1.18043		65	5016	66992	13504	1.10799	1.01691		65	4793	44753	9590	0.692897	0.77455
					% Sox2highSox21low	8.62069	6.89655						66	9336	85856	20562	1.49936	1.69236		66	7388	72770	20353	1.32068	1.41784		66	4217	61580	8609	1.01848	0.648293		66	3122	51939	10034	0.804155	0.810411
					% Sox2lowSox21high	10.3448	13.7931						67	14206	63454	13216	1.10814	1.08775		67	7189	65698	16142	1.19233	1.12449		67	3674	56411	14095	0.93299	1.06141		Average total		64588.3	12381.4
					% Sox2lowSox21low	51.7241	72.4138						68	12028	52713	10935	0.920561	0.900008		68	7293	83052	19586	1.50728	1.36441		68	4571	64839	15839	1.07238	1.19274		Avergae rest		85108.8	14816.9
					Total	100	100						69	13785	53240	8711	0.929764	0.716961		69	4317	69146	15713	1.25491	1.09461		69	19848	41467	9130	0.685829	0.687527		Average Trp63+		39963.6	9458.8
						Int	Int Norm						70	5903	57073	12597	0.996702	1.0368		70	3620	47916	11144	0.869612	0.776318		70	1966	50709	8009	0.838684	0.603111		# of Trp63	30
					Int S2 in S21_high	64124	1.31106						71	9120	53079	13225	0.926952	1.08849		71	4922	43971	11359	0.798015	0.791295		71	10277	53184	13326	0.879618	1.0035		% of Trp63	45.4545
					Int S2 in S21_low	37138.2	0.759317						72	7824	37495	5945	0.654799	0.489305		72	6904	41921	10124	0.76081	0.705262		72	7324	36082	11290	0.596766	0.850184			Total	Trp63
							Int	Int Norm					73	5983	44621	7259	0.779245	0.597454		73	5941	38412	8420	0.697127	0.586557		Average total		60462.6	13279.5				% Sox2highSox21high	34.8485	0
					Int S21 in S2_high		14789.7	1.28016					Average total		57261.8	12149.9				74	6046	44415	17108	0.806073	1.19178		Avergae rest		88036.2	16376.9				% Sox2highSox21low	4.54545	0
					Int S21 in S2_low		9601.44	0.831078					Avergae rest		75596.7	14797.7				75	4595	38437	11484	0.69758	0.800003		Average Trp63+		37131.1	10658.6				% Sox2lowSox21high	6.06061	10
													Average Trp63+		40374.5	9711.08				76	3113	42360	11220	0.768778	0.781612		# of Trp63	39						% Sox2lowSox21low	54.5455	90
													# of Trp63	38						77	13117	32813	14047	0.595512	0.978548		% of Trp63	58.209						Total	100	100
							% of total	% of S2high	%ofS21high				% of Trp63	52.0548						Average total		55100.5	14354.9					Total	Trp63						Int	Int Norm
					# of S2 high	22	37.931	100						Total	Trp63					Avergae rest		75632.8	17977				% Sox2highSox21high	30.5556	5.12821					Int S2 in S21_high	91381.6	1.41483
					# of S21high	23	39.6552		100				% Sox2highSox21high	34.2466	7.89474					Average Trp63+		32903.3	10439.2				% Sox2highSox21low	6.94444	0					Int S2 in S21_low	46318.1	0.717128
					# of S2 high only	5	8.62069	22.7273					% Sox2highSox21low	8.21918	7.89474					# of Trp63	37						% Sox2lowSox21high	13.8889	15.3846							Int	Int Norm
					# of S21 high only	6	10.3448		26.087				% Sox2lowSox21high	5.47945	2.63158					% of Trp63	48.0519						% Sox2lowSox21low	48.6111	79.4872					Int S21 in S2_high		16920.1	1.36657
					# of S2 low	58	100						% Sox2lowSox21low	52.0548	81.5789						Total	Trp63					Total	100	100					Int S21 in S2_low		9431.23	0.761727
					# of S21 low	35	60.3448						Total	100	100					% Sox2highSox21high	36.3636	2.7027						Int	Int Norm
					# of S2highS21high	17	29.3103	77.2727	73.913					Int	Int Norm					% Sox2highSox21low	3.8961	0					Int S2 in S21_high	84326.8	1.39469
													Int S2 in S21_high	79195.2	1.38304					% Sox2lowSox21high	5.19481	5.40541					Int S2 in S21_low	41371.2	0.684245							% of total	% of S2high	%ofS21high
													Int S2 in S21_low	42604.2	0.744025					% Sox2lowSox21low	54.5455	91.8919							Int	Int Norm				# of S2 high	26	39.3939	100
						Sox2	Sox21	Sox2-n	Sox21-n						Int	Int Norm				Total	100	100					Int S21 in S2_high		17616	1.32656				# of S21high	27	40.9091		100
					Lowest value	18245	4767	0.374998	0.412035				Int S21 in S2_high		15911	1.30956					Int	Int Norm					Int S21 in S2_low		10677.6	0.804064				# of S2 high only	3	4.54545	11.5385
					Highst value	103071	23757	2.11847	2.05343				Int S21 in S2_low		9373.86	0.771518				Int S2 in S21_high	84241.1	1.52886												# of S21 high only	4	6.06061		14.8148
					Average	48653.5	11569.4													Int S2 in S21_low	33046.3	0.599747												# of S2 low	40	60.6061
																						Int	Int Norm						% of total	% of S2high	%ofS21high			# of S21 low	39	59.0909
															% of total	% of S2high	%ofS21high			Int S21 in S2_high		19651	1.36893				# of S2 high	27	37.5	100				# of S2highS21high	23	34.8485	88.4615	85.1852
													# of S2 high	31	42.4658	100				Int S21 in S2_low		10785.9	0.751371				# of S21high	32	44.4444		100
													# of S21high	33	45.2055		100										# of S2 high only	5	6.94444	18.5185					Sox2	Sox21	Sox2-n	Sox21-n
													# of S2 high only	6	8.21918	19.3548											# of S21 high only	10	13.8889		31.25			Lowest value	18275	5538	0.282946	0.447285
													# of S21 high only	4	5.47945		12.1212					% of total	% of S2high	%ofS21high			# of S2 low	45	62.5					Highst value	145137	27762	2.63404	2.24224
													# of S2 low	42	57.5342					# of S2 high	31	40.2597	100				# of S21 low	40	55.5556					Average	64588.3	12381.4
													# of S21 low	40	54.7945					# of S21high	32	41.5584		100			# of S2highS21high	22	30.5556	81.4815	68.75
													# of S2highS21high	25	34.2466	80.6452	75.7576			# of S2 high only	3	3.8961	9.67742
																				# of S21 high only	4	5.19481		12.5
																				# of S2 low	46	59.7403
														Sox2	Sox21	Sox2-n	Sox21-n			# of S21 low	45	58.4416						Sox2	Sox21	Sox2-n	Sox21-n
													Lowest value	19630	5945	0.342811	0.489305			# of S2highS21high	28	36.3636	90.3226	87.5			Lowest value	18597	4185	0.307579	0.315148
													Highst value	124270	28981	2.17021	2.38529										Highst value	130472	29934	2.36789	2.25415
													Average	57261.8	12149.9												Average	60462.6	13279.5
																					Sox2	Sox21	Sox2-n	Sox21-n
																				Lowest value	17793	6793	0.322919	0.473217
																				Highst value	144209	36588	2.6172	2.54881
																				Average	55100.5	14354.9

## Sheet: Fig 4C Exp3_Foxj1
Intensity measurements		1						2								3							4						5
			Foxj1	Sox2	Sox21				Foxj1	Sox2	Sox21	Sox2-n	Sox21-n				Foxj1	Sox2	Sox21					Foxj1	Sox2	Sox21				Foxj1	Sox2	Sox21
		1	28004	108939	21909			1	38969	63068	6288	1.07487	0.38204			1	32489	152905	32292				1	34628	58672	19772			1	32521	64821	13162
		2	17514	65796	16014			2	62428	108840	25283	1.85496	1.53612			2	29993	88448	20537				2	30917	55400	17883			2	33340	74732	12614
		3	29483	78767	18198			3	70785	118860	29491	2.02573	1.79178			3	28909	77705	26330				3	53468	70138	15277			3	29162	59178	14283
		4	35271	124380	24904			4	64251	88025	18609	1.50021	1.13063			4	34321	87255	18307				4	58962	84502	30364			4	25792	46075	14849
		5	34600	91760	17229			5	59006	78789	18972	1.3428	1.15268			5	25304	63576	14250				5	56676	85608	18122			5	30977	82205	19523				Exp 3
		6	27384	96110	19801			6	43126	62402	14931	1.06352	0.907162			6	46164	93690	24948				6	58241	92545	26732			6	35625	67319	21844						Int Sox2	Int Sox21	Sox2-n	Sox21-n
		7	28524	95979	20874			7	51547	78151	19512	1.33193	1.18549			7	32091	71955	17409				7	65496	95139	22243			7	47775	95625	29450				Average total		60728.5	17675	1	1
		8	27224	114316	26224			8	30622	68171	10244	1.16184	0.622395			8	37583	94569	18347				8	68275	94968	24534			8	39863	99410	20165				Avergae rest		53627.5	16468.3	0.88307	0.931727
		9	25	117727	26512			9	42760	82882	22185	1.41256	1.34789			9	40158	139036	47279				9	56106	86865	26418			9	32625	88946	22571				Average Foxj1+		86923.9	22147.1	1.43135	1.25302
		10	43262	130306	31235			10	46519	65025	20617	1.10822	1.25263			10	42587	134910	36303				10	53242	87475	27929			10	35844	96195	33312				# of Foxj1	15
		11	34406	93119	18594			11	35051	65158	22316	1.11049	1.35585			11	39318	116779	32851				11	46299	118474	31443			11	37078	82328	17767				% of Foxj1	21.5344
		12	23857	87088	15791			12	43814	70530	23586	1.20204	1.43301			12	38631	108281	27438				12	53021	70529	20800			12	41412	94109	27664					Total	Foxj1
		13	29091	68225	18770			13	52688	102405	29549	1.74529	1.79531			13	45468	130413	40336				13	4817	51911	18150			13	39947	65800	19976				% Sox2highSox21high	32.5447	72.0833
		14	22703	80484	18593			14	50274	54269	14926	0.924905	0.906859			14	18883	69012	21031				14	5805	33817	11744			14	44250	95849	12184				% Sox2highSox21low	10.0156	17.0833
		15	27335	98877	22837			15	34536	81824	26056	1.39452	1.58308			15	39945	87956	23846				15	4581	39816	13434			15	45240	86961	29286				% Sox2lowSox21high	10.8475	2.91667
		16	4177	58156	10052			16	39191	52088	15162	0.887734	0.921197			16	36449	71039	15551				16	5969	77398	23472			16	23087	43928	14333				% Sox2lowSox21low	46.5922	7.91667
		17	4784	47047	7797			17	6948	57566	17590	0.981096	1.06872			17	4701	46272	14170				17	5654	43503	12717			17	3902	64590	13615				Total	100	100
		18	5535	41873	9044			18	6702	41645	10557	0.709755	0.641411			18	3983	58850	15033				18	5603	59824	17978			18	2896	36776	10104					Int	Int Norm
		19	3114	58353	12551			19	8383	59099	11395	1.00722	0.692326			19	3391	65518	24718				19	8980	41418	10092			19	3647	27991	5716				Int S2 in S21_high	76490	1.25883
		20	4760	93509	22892			20	8052	69013	13046	1.17619	0.792636			20	4108	64294	19569				20	5968	56887	14065			20	5162	44181	10562				Int S2 in S21_low	48177.9	0.794546
		21	4207	60213	13707			21	6591	28031	7417	0.477732	0.450635			21	3706	64353	17431				21	6868	52110	19875			21	3741	47518	19473						Int	Int Norm
		22	4078	73078	14695			22	9769	61983	18223	1.05637	1.10717			22	3833	35392	13275				22	5914	52716	14741			22	2792	40358	16481				Int S21 in S2_high		22024.8	1.24761
		23	3597	46363	11871			23	6652	39519	12410	0.673521	0.753994			23	3857	54208	27961				23	8141	68391	26964			23	3524	55167	17429				Int S21 in S2_low		14502.3	0.819959
		24	8551	55981	12823			24	7287	74966	19270	1.27764	1.17079			24	3859	69397	22026				24	7339	58790	20694			24	3991	32037	9725
		25	3821	55071	11400			25	11629	50045	10939	0.852916	0.664621			25	4372	91203	24936				25	6263	43382	15053			25	2825	36317	11659
		26	5991	53701	9521			26	8059	75422	14219	1.28541	0.863903			26	4128	68624	26203				26	9030	55321	19657			26	3507	62410	17903						% of total	% of S2high	%ofS21high
		27	2567	46346	9904			27	8762	77756	18446	1.32519	1.12072			27	5141	82380	23598				27	10948	37991	11509			27	3874	41667	12198				# of S2 high	29.8	42.5603	100
		28	3023	71098	10803			28	5272	45074	14222	0.768195	0.864086			28	5088	91294	21838				28	6295	42357	11446			28	3312	49123	16578				# of S21high	30.2	43.1065		30.2
		29	6048	67175	17762			29	14009	53879	13788	0.918258	0.837717			29	3768	38196	9536				29	7799	63381	18097			29	3980	70881	22921				# of S2 high only	6.8	10.0156	23.5905
		30	4405	35114	10215			30	11441	55279	13838	0.942118	0.840755			30	4246	31261	7841				30	6431	56542	16764			30	3176	47696	11833				# of S21 high only	7.2	10.5618		7.2
		31	3300	40371	12093			31	8102	47784	13080	0.814381	0.794701			31	4078	69978	19200				31	5867	39600	14367			31	3218	49427	12500				# of S2 low	46.4	65.4397
		32	6466	52738	11621			32	9167	37899	12543	0.645912	0.762075			32	4194	45049	11728				32	5840	51064	20846			32	3976	43073	8984				# of S21 low	39.6	56.8935
		33	6857	100371	23550			33	6933	37833	8837	0.644787	0.536909			33	4404	67489	12504				33	15369	56566	14959			33	4746	63475	19220				# of S2highS21high	23	32.5447	76.4095	23
		34	5970	99109	20279			34	8149	75139	22109	1.28059	1.34328			34	4278	41357	7563				34	6230	51243	16171			34	4978	40926	12667
		35	3210	43903	16645			35	8904	86400	27252	1.47251	1.65575			35	5056	82341	19810				35	6349	53678	19781			35	3890	61630	24219				AVERAGE	Sox2	Sox21	Sox2-n	Sox21-n
		36	4609	55866	19050			36	9545	62929	13330	1.0725	0.809891			36	3354	56438	17062				36	7026	56066	8355			36	3956	40982	11175				Lowest value	26714.8	6887.8	0.441693	0.389985
		37	5650	106010	16440			37	6263	46632	10653	0.794748	0.647244			37	4629	52164	17483				37	6902	49891	16361			37	5229	50636	15746				Highst value	123991	38547.8	2.03214	2.16972
		38	4985	41808	14662			38	6717	52399	11942	0.893035	0.72556			38	7680	48853	18480				38	6839	82795	18232			38	4875	84133	34781				Average	60728.5	17675
		39	4297	41541	15676			39	8205	60974	17167	1.03918	1.04302			39	5067	52394	11865				39	6969	90531	38051			39	5371	71500	26257
		40	3919	48570	20698			40	10879	43945	14382	0.748953	0.873807			40	5034	52798	16079				40	7944	59889	15444			40	3945	50055	13555				MIN MAX overall	Sox2-n	Sox21-n
		41	3556	57500	28744			41	9564	72135	16564	1.22939	1.00638			41	4217	51739	14329				41	6148	38852	16907			41	4157	59966	15191				Lowest value	0.346821	0.326777
		42	5198	97881	18248			42	10352	53330	17841	0.908902	1.08397			42	4522	50846	9103				42	6974	56886	18544			42	3537	41074	15380				Highst value	2.20023	2.6655
		43	5740	115675	24236			43	5908	34717	12417	0.591681	0.754419			43	6940	42940	8460				43	7539	70790	21359			43	5262	44336	19458				Average
		44	5312	86927	19523			44	5977	33244	13565	0.566577	0.824168			44	5544	57006	15494				44	12443	58830	13717			44	5173	40816	10020
		45	5148	79254	16669			45	6976	30079	10206	0.512636	0.620086			45	4301	50384	17301				45	7119	70825	21610			45	5363	34098	9696
		46	4230	63914	17475			46	8271	93186	24932	1.58817	1.51479			46	4748	62802	20542				46	6403	39050	17261			46	5435	49761	22022
		47	4405	62865	18264			47	8983	44792	10315	0.763389	0.626708			47	3913	82899	28768				47	5827	47873	22191			47	5227	64411	12972
		48	4858	66881	17590			48	8376	31511	12092	0.537041	0.734673			48	6055	57011	16319				48	7497	30542	12242			48	5817	30172	11521
		49	3830	64400	21130			49	8272	39853	18969	0.679214	1.1525			49	5296	50469	25679				49	10	45575	19932			49	9127	34382	14600
		50	3529	60445	15479			50	8197	32803	14051	0.559061	0.853696			50	6	111551	33938				50	8670	50659	16835			50	5359	43664	15832
		51	4664	39906	12562			51	7720	68147	23433	1.16143	1.42372			51	4277	44672	17008				51	5814	38678	16992			51	4338	26779	23403
		52	5500	39158	11539			52	6678	38243	12826	0.651774	0.779269			52	4967	97951	23724				52	12248	63119	25578			52	4689	32189	14757
		53	3196	38253	11114			53	8333	64848	25212	1.1052	1.5318			53	3009	47037	19009				53	5851	45565	16596			53	4101	32353	17640
		54	3169	56513	14044			54	7663	78651	26120	1.34045	1.58697			54	4577	50423	21559				54	14765	47191	18691			54	10139	56148	25984
		55	4465	58570	15279			55	9089	54701	16586	0.932268	1.00772			55	5132	78772	18956				55	7296	49197	17437			55	4640	62108	26856
		56	3754	36119	9333			56	9729	65793	16757	1.12131	1.0181			56	4340	71660	22509				56	6570	56785	22104			56	4312	84068	46625
		57	3772	31551	11750			57	6257	33099	17270	0.564105	1.04927			57	12721	90110	26058				57	8	37575	16230			57	4294	61902	20667
		58	4688	35232	14609			58	10257	77595	18372	1.32245	1.11623			58	5970	42140	14560				58	5593	55204	20071			58	3736	31357	14116
		59	6014	35297	11865			59	9052	54693	13104	0.932131	0.796159			59	5021	87865	20426				59	6757	39878	13919			59	3945	33569	15486
		60	3489	29727	8633			60	5448	31538	15217	0.537501	0.924539			60	3237	30704	13044				60	7727	64773	14047			60	5019	46774	21472
		61	3611	45286	12976			61	6490	86908	20112	1.48117	1.22194			61	3500	29987	11885				Average total		58917.3	18713.3			61	5021	55574	19979
		62	4131	88109	20708			62	6897	31888	11991	0.543466	0.728537			62	4424	80958	22170				Avergae rest		52806.8	17526.7			62	4299	61932	22946
		63	3688	71812	18917			63	6500	44485	16022	0.758157	0.973448			63	3730	75918	28205				Average Foxj1+		83359.6	23459.8			63	4400	29682	11282
		64	3487	50481	12481			64	8559	39909	10853	0.680168	0.659396			64	5013	77967	18401				# of Foxj1	12					64	3448	25768	7931
		65	2863	51295	12137			65	6492	25754	9313	0.438925	0.56583			65	9356	38288	11683				% of Foxj1	20					65	6885	46692	17490
		66	2786	30602	11286			66	6892	46585	16297	0.793947	0.990157			66	4022	76620	19117					Total	Foxj1				66	5327	29693	12293
		67	3687	51400	12993			67	5809	52827	21064	0.900329	1.27979			67	2894	41523	22045				% Sox2highSox21high	23.3333	66.6667				67	4384	54656	14456
		68	3118	50031	15342			68	5781	46067	15438	0.785119	0.937966			68	2875	44925	13475				% Sox2highSox21low	11.6667	16.6667				68	3467	35833	11100
		69	3	43821	15274			69	5960	65097	21710	1.10945	1.31903			69	3327	73715	20582				% Sox2lowSox21high	16.6667	8.33333				Average total		54496.9	17492
		70	3067	54581	11210			70	9144	53089	9100	0.904794	0.552889			70	4495	41237	17082				% Sox2lowSox21low	48.3333	8.33333				Avergae rest		47352	16663
		71	2971	33962	8448			Average total		58675.2	16459					71	9532	76404	26384				Total	100	100				Average Foxj1+		77717.6	20186.4
		72	2983	30405	7083			Avergae rest		53088.5	15451.9					Average total		69495.1	20208.2					Int	Int Norm				# of Foxj1	16
		73	2408	36815	13246			Average Foxj1+		77530.4	19857.9					Avergae rest		60847.7	18504.1				Int S2 in S21_high	71109.3	1.20693				% of Foxj1	23.5294
		74	5795	42329	16726			# of Foxj1	16							Average Foxj1+		99220.6	26065.9				Int S2 in S21_low	49466.9	0.839599					Total	Foxj1
		75	3414	31331	9038			% of Foxj1	22.8571							# of Foxj1	16								Int	Int Norm			% Sox2highSox21high	32.3529	62.5
		76	2025	28165	13322				Total	Foxj1						% of Foxj1	22.5352						Int S21 in S2_high		23080.7	1.23338			% Sox2highSox21low	13.2353	25
		77	3040	21523	6517			% Sox2highSox21high	37.1429	68.75							Total	Foxj1					Int S21 in S2_low		16361.7	0.874333			% Sox2lowSox21high	8.82353	0
		78	3257	27638	11295			% Sox2highSox21low	10	18.75						% Sox2highSox21high	32.3944	62.5											% Sox2lowSox21low	45.5882	12.5
		79	3809	43669	9363			% Sox2lowSox21high	8.57143	0						% Sox2highSox21low	12.6761	25											Total	100	100
		80	3333	30068	10530			% Sox2lowSox21low	44.2857	12.5						% Sox2lowSox21high	12.6761	6.25							% of total	% of S2high	%ofS21high			Int	Int Norm
		Average total		62057.9	15502.7			Total	100	100						% Sox2lowSox21low	42.2535	6.25					# of S2 high	21	35	100			Int S2 in S21_high	67935	1.24659
		Avergae rest		54042.4	14195.8				Int	Int Norm						Total	100	100					# of S21high	24	40		100		Int S2 in S21_low	45090.2	0.82739
		Average Foxj1+		96791.5	21165.7			Int S2 in S21_high	73170.1	1.24704							Int	Int Norm					# of S2 high only	7	11.6667	33.3333					Int	Int Norm
		# of Foxj1	15					Int S2 in S21_low	46469	0.79197						Int S2 in S21_high	86750.2	1.24829					# of S21 high only	10	16.6667		41.6667		Int S21 in S2_high		21800.7	1.24632
		% of Foxj1	18.75							Int	Int Norm					Int S2 in S21_low	55337.1	0.796273					# of S2 low	39	65				Int S21 in S2_low		13882.1	0.793623
			Total	Foxj1				Int S21 in S2_high		19857.8	1.2065							Int	Int Norm				# of S21 low	36	60
		% Sox2highSox21high	37.5	100				Int S21 in S2_low		13427.6	0.815823					Int S21 in S2_high		25012.3	1.23773				# of S2highS21high	14	23.3333	66.6667	58.3333
		% Sox2highSox21low	2.5	0												Int S21 in S2_low		16266.3	0.804937												% of total	% of S2high	%ofS21high
		% Sox2lowSox21high	7.5	0																									# of S2 high	31	45.5882	100
		% Sox2lowSox21low	52.5	0						% of total	% of S2high	%ofS21high																	# of S21high	28	41.1765		100
		Total	100	100				# of S2 high	33	47.1429	100							% of total	% of S2high	%ofS21high				Sox2	Sox21	Sox2-n	Sox21-n		# of S2 high only	9	13.2353	29.0323
			Int	Int Norm				# of S21high	31	44.2857		0				# of S2 high	32	45.0704	100				Lowest value	30542	8355	0.518387	0.446474		# of S21 high only	6	8.82353		21.4286
		Int S2 in S21_high	83485.4	1.34528				# of S2 high only	7	10	21.2121					# of S21high	32	45.0704		100			Highst value	118474	38051	2.01085	2.03336		# of S2 low	37	54.4118
		Int S2 in S21_low	44526.2	0.717496				# of S21 high only	5	7.14286		12.1212				# of S2 high only	9	12.6761	28.125				Average	58917.3	18713.3				# of S21 low	40	58.8235
				Int	Int Norm			# of S2 low	37	52.8571						# of S21 high only	9	12.6761		28.125									# of S2highS21high	22	32.3529	70.9677	78.5714
		Int S21 in S2_high		20372.3	1.31411			# of S21 low	39	55.7143						# of S2 low	39	54.9296
		Int S21 in S2_low		12573.9	0.81108			# of S2highS21high	26	37.1429	78.7879	75.7576				# of S21 low	39	54.9296												Sox2	Sox21	Sox2-n	Sox21-n
																# of S2highS21high	23	32.3944	71.875	71.875									Lowest value	25768	5716	0.472835	0.326777
																													Highst value	99410	46625	1.82414	2.6655
				% of total	% of S2high	%ofS21high			Sox2	Sox21	Sox2-n	Sox21-n																	Average	54496.9	17492
		# of S2 high	32	40	100			Lowest value	25754	6288	0.438925	0.38204					Sox2	Sox21	Sox2-n	Sox21-n
		# of S21high	36	45		100		Highst value	118860	29549	2.02573	1.79531				Lowest value	29987	7563	0.431498	0.374255
		# of S2 high only	2	2.5	6.25			Average	58675.2	16459						Highst value	152905	47279	2.20023	2.3396
		# of S21 high only	6	7.5		16.6667										Average	69495.1	20208.2
		# of S2 low	80	100
		# of S21 low	44	55
		# of S2highS21high	30	37.5	93.75	83.3333
			Sox2	Sox21	Sox2-n	Sox21-n
		Lowest value	21523	6517	0.346821	0.420379
		Highst value	130306	31235	2.09975	2.01481
		Average	62057.9	15502.7

## Sheet: Fig 4C Total Trp63
	Exp1								Exp 2								Exp 3							Total
			Int Sox2	Int Sox21	Sox2-n	Sox21-n				Int Sox2	Int Sox21	Sox2-n	Sox21-n						Int Sox2	Int Sox21	Sox2-n	Sox21-n			Int Sox2	Int Sox21	Sox2-n	Sox21-n
	Average total		37880.9	14061.2	1	1			Average total	80323.1	24829.5	1	1				Average total		57213.3	12747	1	1		Average total	58472.4	17212.6	1	1
	Avergae rest		47049.9	16952.3	1.24205	1.2056			Avergae rest	94842.8	30505.5	1.18077	1.2286				Avergae rest		72224.9	14772.9	1.26238	1.15893		Avergae rest	71372.5	20743.5	1.2284	1.19771
	Average Trp63+		29183.4	11157.9	0.770399	0.793524			Average Trp63+	64196.7	18351.3	0.799232	0.739092				Average Trp63+		42185.9	10702.1	0.737344	0.83958		Average Foxj1+	45188.7	13403.8	0.768991	0.790732
	# of Trp63	37.2							# of Trp63	37							# of Trp63	34.6						# of Trp63	37
	% of Trp63	51.7992							% of Trp63	52.0138							% of Trp63	50.754						% of Trp63	52.0138
		Total	Trp63							Total	Trp63							Total	Trp63						Total	Trp63
	% Sox2highSox21high	36.6821	10.5947						% Sox2highSox21high	30.5649	3.81711						% Sox2highSox21high	33.0649	4.52444					% Sox2highSox21high	33.4373	6.31208
	% Sox2highSox21low	8.21951	6.44907						% Sox2highSox21low	9.41456	9.18228						% Sox2highSox21low	6.44517	2.95826					% Sox2highSox21low	8.02642	6.19654
	% Sox2lowSox21high	6.43458	7.65916						% Sox2lowSox21high	6.82018	3.74111						% Sox2lowSox21high	8.19372	9.44294					% Sox2lowSox21high	7.14949	6.94774
	% Sox2lowSox21low	48.6638	75.2971						% Sox2lowSox21low	53.2003	83.2595						% Sox2lowSox21low	52.2962	83.0744					% Sox2lowSox21low	51.3868	80.5436
	Total	100	100						Total	100	100						Total	100	100					Total	100	100
		Int	Int Norm							Int	Int Norm							Int	Int Norm						Int	Int Norm
	Int S2 in S21_high	48935.3	1.29182						Int S2 in S21_high	100686	1.25351						Int S2 in S21_high	80653.7	1.4097					Int S2 in S21_high	76758.2	1.31834
	Int S2 in S21_low	28873.7	0.762224						Int S2 in S21_low	65360.1	0.813715						Int S2 in S21_low	40095.6	0.700809					Int S2 in S21_low	44776.5	0.758916
			Int	Int Norm							Int	Int Norm							Int	Int Norm						Int	Int Norm
	Int S21 in S2_high		17844.2	1.26903					Int S21 in S2_high		32274.7	1.29985					Int S21 in S2_high		16977.5	1.33188				Int S21 in S2_high		22365.5	1.30026
	Int S21 in S2_low		10698.2	0.760832					Int S21 in S2_low		18490.3	0.744692					Int S21 in S2_low		9973.99	0.782457				Int S21 in S2_low		13054.2	0.76266
			% of total	% of S2high	%ofS21high						% of total	% of S2high	%ofS21high						% of total	% of S2high	%ofS21high					% of total	% of S2high	%ofS21high
	# of S2 high	32.6	45.5202	100					# of S2 high	28.4	39.9795	100					# of S2 high	27.4	39.5101	100				# of S2 high	29.4667	41.6699	100
	# of S21high	31.4	44.1339		100				# of S21high	26.8	37.3851		100				# of S21high	29.4	42.3545		100			# of S21high	29.2	41.2912		100
	# of S2 high only	6.2	8.48281	18.6482					# of S2 high only	6.6	9.41456	23.112					# of S2 high only	4.4	6.44517	16.3633				# of S2 high only	5.73333	8.11418	19.3745
	# of S21 high only	5	7.09655		15.7857				# of S21 high only	5	6.82018		17.9884				# of S21 high only	5.6	8.19372		19.3546			# of S21 high only	5.2	7.37015		17.7096
	# of S2 low	39.2	54.7179						# of S2 low	43	60.0205						# of S2 low	46.2	68.0761					# of S2 low	42.8	60.9382
	# of S21 low	40.4	56.1042						# of S21 low	44.6	62.6149						# of S21 low	39.8	57.6455					# of S21 low	41.6	58.7882
	# of S2highS21high	26.4	37.0373	81.3518	84.2143				# of S2highS21high	21.8	30.5649	76.888	82.0116				# of S2highS21high	23	33.0649	83.6367	78.2212			# of S2highS21high	23.7333	33.5557	80.6255	81.4824
																	AVERAGE	Sox2	Sox21	Sox2-n	Sox21-n			AVERAGE	Sox2	Sox21	Sox2-n	Sox21-n
																	Lowest value	18508	5445.6	0.326251	0.427398			Lowest value	21922.9	6841.13	0.368578	0.398214
	AVERAGE	Sox2	Sox21	Sox2-n	Sox21-n				AVERAGE	Sox2	Sox21	Sox2-n	Sox21-n				Highst value	129432	29404.4	2.38156	2.29678			Highst value	114451	36337.5	2.01312	2.13269
	Lowest value	13539	5233.8	0.358219	0.374777				Lowest value	33721.6	9844	0.421265	0.392466				Average	57213.3	12747					Average	58414.1	17237.2
	Highst value	70710.2	29159.8	1.86645	2.07126				Highst value	143211	50448.4	1.79135	2.03002
	Average	37880.9	14061.2						Average	80148	24903.5						MIN MAX overall	Sox2-n	Sox21-n					MIN MAX overall	Sox2-n	Sox21-n
																	Lowest value	0.282946	0.315148					Lowest value	0.3059	0.236269
	MIN MAX overall	Sox2-n	Sox21-n														Highst value	2.63404	2.54881					Highst value	3.32683	3.2843
	Lowest value	0.195299	0.311779																					Average
	Highst value	2.11695	2.21294
																	19.3546	78.2212
																	17.9884	82.0116
																	15.7857	84.2143

## Sheet: Fig 4C Total Foxj1
	Exp 1							Exp 2								Exp 3								Total
		Int Sox2	Int Sox21	Sox2-n	Sox21-n				Int Sox2	Int Sox21	Sox2-n	Sox21-n					Int Sox2	Int Sox21	Sox2-n	Sox21-n					Int Sox2	Int Sox21	Sox2-n	Sox21-n
	Average total	34345.5	11845.8	1	1			Average total	52138.4	19858.4	1	1				Average total	60728.5	17675	1	1				Average total	49070.8	16459.7	1	1
	Avergae rest	32537.8	11295.4	0.947366	0.95354			Avergae rest	45713.1	18505.8	0.876763	0.931888				Avergae rest	53627.5	16468.3	0.88307	0.931727				Avergae rest	43959.4	15423.2	0.9024	0.939052
	Average Foxj1+	49965.2	15878.9	1.45478	1.34047			Average Foxj1+	79773.8	25692.9	1.53004	1.29381				Average Foxj1+	86923.9	22147.1	1.43135	1.25302				Average Foxj1+	72221	21239.6	1.47206	1.29576
	# of Foxj1	14.6						# of Foxj1	15.8							# of Foxj1	15							# of Foxj1	15.1333
	% of Foxj1	18.4387						% of Foxj1	23.0554							% of Foxj1	21.5344							% of Foxj1	21.0095
																	Total	Foxj1							Total	Foxj1
		Total	Foxj1						Total	Foxj1						% Sox2highSox21high	32.5447	72.0833						% Sox2highSox21high	35.3587	77.7679
	% Sox2highSox21high	36.186	78.3314					% Sox2highSox21high	37.3455	82.8889						% Sox2highSox21low	10.0156	17.0833						% Sox2highSox21low	9.12996	14.5309
	% Sox2highSox21low	9.97206	13.6203					% Sox2highSox21low	7.40221	12.8889						% Sox2lowSox21high	10.8475	2.91667						% Sox2lowSox21high	9.00277	1.34259
	% Sox2lowSox21high	8.05404	0					% Sox2lowSox21high	8.10674	1.11111						% Sox2lowSox21low	46.5922	7.91667						% Sox2lowSox21low	46.5085	6.35868
	% Sox2lowSox21low	45.7879	8.04827					% Sox2lowSox21low	47.1456	3.11111						Total	100	100						Total	100	100
	Total	100	100					Total	100	100							Int	Int Norm							Int	Int Norm
																Int S2 in S21_high	76490	1.25883						Int S2 in S21_high	64696	1.32651
		Int	Int Norm						Int	Int Norm						Int S2 in S21_low	48177.9	0.794546						Int S2 in S21_low	38301.3	0.780275
	Int S2 in S21_high	46818.8	1.36317					Int S2 in S21_high	70779.2	1.35752								Int	Int Norm							Int	Int Norm
	Int S2 in S21_low	26820.5	0.780902					Int S2 in S21_low	39905.5	0.765376						Int S21 in S2_high		22024.8	1.24761					Int S21 in S2_high		21275.7	1.29667
			Int	Int Norm						Int	Int Norm					Int S21 in S2_low		14502.3	0.819959					Int S21 in S2_low		12851.4	0.778401
	Int S21 in S2_high		15776.9	1.33186				Int S21 in S2_high		26025.5	1.31055
	Int S21 in S2_low		8927.05	0.753606				Int S21 in S2_low		15124.9	0.761639
																		% of total	% of S2high	%ofS21high						% of total	% of S2high	%ofS21high
			% of total	% of S2high	%ofS21high					% of total	% of S2high	%ofS21high				# of S2 high	29.8	42.5603	100					# of S2 high	32.2667	44.3696	100
	# of S2 high	36.6	46.1581	100				# of S2 high	30.4	44.3905	100					# of S21high	30.2	43.1065		30.2				# of S21high	32.2	44.2829		76.7333
	# of S21high	35.8	45.062		100			# of S21high	30.6	44.6803		100				# of S2 high only	6.8	10.0156	23.5905					# of S2 high only	6.33333	8.85599	19.9303
	# of S2 high only	7.2	9.15015	19.5993				# of S2 high only	5	7.40221	16.6012					# of S21 high only	7.2	10.5618		7.2				# of S21 high only	6.33333	8.90753		14.365
	# of S21 high only	6.4	8.05404		17.6386			# of S21 high only	5.4	8.10674		18.2562				# of S2 low	46.4	65.4397						# of S2 low	42.5333	58.297
	# of S2 low	43	53.8419					# of S2 low	38.2	55.6095						# of S21 low	39.6	56.8935						# of S21 low	40.4	55.627
	# of S21 low	43.8	54.938					# of S21 low	37.8	55.0494						# of S2highS21high	23	32.5447	76.4095	23				# of S2highS21high	25.9333	35.5137	80.0697	62.7113
	# of S2highS21high	29.4	37.0079	80.4007	82.3614			# of S2highS21high	25.4	36.9883	83.3988	82.7725
																AVERAGE	Sox2	Sox21	Sox2-n	Sox21-n				AVERAGE	Sox2	Sox21	Sox2-n	Sox21-n
	AVERAGE	Sox2	Sox21	Sox2-n	Sox21-n			AVERAGE	Sox2	Sox21	Sox2-n	Sox21-n				Lowest value	26714.8	6887.8	0.441693	0.389985				Lowest value	20436.6	8822.47	0.435923	0.385618
	Lowest value	13906.6	4532.6	0.389197	0.380657			Lowest value	20688.4	15047	0.476879	0.386212				Highst value	123991	38547.8	2.03214	2.16972				Highst value	102355	34565.6	2.2279	2.4032
	Highst value	76392.2	28802.2	2.26536	2.43462			Highst value	106683	36346.8	2.38619	2.60527				Average	60728.5	17675						Average	47063.1	15692.6
	Average	34345.5	11845.8					Average	46115.3	17556.8
																MIN MAX overall	Sox2-n	Sox21-n						MIN MAX overall	Sox2-n	Sox21-n
	MIN MAX overall	Sox2-n	Sox21-n					MIN MAX overall	Sox2-n	Sox21-n						Lowest value	0.346821	0.326777						Lowest value	0.3059	0.236269
	Lowest value	0.3059	0.298164					Lowest value	0.340385	0.236269						Highst value	2.20023	2.6655						Highst value	3.32683	3.2843
	Highst value	2.69362	2.85077					Highst value	3.32683	3.2843						Average								Average
								Average

## Sheet: Fig 4C Foxj1 Scatter
	1				2				3
	Foxj1-		Foxj+		Foxj1-		Foxj+		Foxj1-		Foxj+
	Sox2	Sox21	Sox2	Sox21	Sox2	Sox21	Sox2	Sox21	Sox2	Sox21	Sox2	Sox21
	0.535793	0.799208	1.34984	1.0336	1.17803	1.19945	1.74494	1.19945	0.981096	1.06872	1.07487	0.38204
	0.604831	0.620733	1.4919	1.33175	0.483567	0.629838	0.772464	0.78321	0.709755	0.641411	1.85496	1.53612
	1.05125	1.49693	1.25016	1.56365	0.706377	1.14718	1.66595	1.45386	1.00722	0.692326	2.02573	1.79178
	0.518687	0.720508	1.31	1.68761	0.746245	0.99019	2.02875	1.92966	1.17619	0.792636	1.50021	1.13063
	1.44383	1.64438	1.40974	1.55144	0.94779	1.11031	1.95449	1.60379	0.477732	0.450635	1.3428	1.15268
	0.414248	0.573218	1.38286	1.284	0.793577	0.942977	1.65683	1.21813	1.05637	1.10717	1.06352	0.907162
	1.56274	1.47344	1.78974	1.58473	0.562915	0.585961	2.29874	1.82061	0.673521	0.753994	1.33193	1.18549
	0.777337	0.716775	1.74066	1.61428	0.552046	0.63373	1.89251	0.683946	1.27764	1.17079	1.16184	0.622395
	0.570996	0.867642	1.43125	0.982581	0.49516	0.705856	1.58517	1.49146	0.852916	0.664621	1.41256	1.34789
	1.07186	1.68054	1.35924	1.0836	1.23194	1.55007	1.86434	1.80182	1.28541	0.863903	1.10822	1.25263
	0.577458	0.650673	0.919616	0.894938	0.447727	0.560436	1.26533	1.09268	1.32519	1.12072	1.11049	1.35585
	1.73697	2.02077	1.2629	0.953574	1.37777	1.30033	1.49259	1.11503	0.768195	0.864086	1.20204	1.43301
	0.456686	0.476398	1.05662	0.855977	1.25253	1.44797	1.74804	1.40615	0.918258	0.837717	1.74529	1.79531
	1.38126	1.67727			0.726598	0.743171	1.48199	1.37651	0.942118	0.840755	0.924905	0.906859
	1.17315	1.21806			0.606287	0.596972	1.82911	1.27091	0.814381	0.794701	1.39452	1.58308
	0.684672	0.715297			0.883321	0.86529	1.08552	0.430532	0.645912	0.762075	0.887734	0.921197
	0.607012	0.430905			1.58313	1.87739	1.04397	0.967835	0.644787	0.536909
	0.550481	0.621511			0.823705	1.0612	0.983715	1.04535	1.28059	1.34328
	1.49652	1.7377			0.896599	0.966667			1.47251	1.65575
	1.04958	0.784199			0.775851	0.804842			1.0725	0.809891
	0.638508	0.640175			0.762051	0.768529			0.794748	0.647244
	0.676427	0.957307			1.6646	2.09388			0.893035	0.72556
	0.742293	0.83498			1.26211	1.36422			1.03918	1.04302
	0.948139	1.18711			1.0143	1.18299			0.748953	0.873807
	0.889348	1.54273			0.884922	0.795166			1.22939	1.00638
	0.976127	1.28051			1.17213	1.06877			0.908902	1.08397
	1.32326	1.5044			0.68058	0.767695			0.591681	0.754419
	1.23309	1.19807			0.870212	0.990468			0.566577	0.824168
	0.805464	0.753559			0.828474	0.851999			0.512636	0.620086
	1.01668	0.809395			0.931378	0.899601			1.58817	1.51479
	1.07192	0.892994			1.01993	1.0552			0.763389	0.626708
	1.04057	1.06206			0.758613	0.631784			0.537041	0.734673
	1.11075	0.844701			1.31504	0.948872			0.679214	1.1525
	0.59389	0.672681			0.933434	0.674659			0.559061	0.853696
	0.912797	0.771678			0.855805	0.931577			1.16143	1.42372
	1.02178	0.999301			1.38576	1.73453			0.651774	0.779269
	0.832818	0.951552			0.755395	0.764302			1.1052	1.5318
	0.616942	0.56303			1.09626	1.19439			1.34045	1.58697
	1.02693	0.889028			1.29342	1.53811			0.932268	1.00772
	0.547726	0.552843			0.92511	0.797891			1.12131	1.0181
	1.24461	0.99028			0.83272	0.881194			0.564105	1.04927
	1.09123	0.865387			1.12628	0.967			1.32245	1.11623
	0.678111	0.705032			0.574457	0.718369			0.932131	0.796159
	1.19117	1.04619			0.549451	0.606593			0.537501	0.924539
	1.27071	1.09363			0.674126	0.977399			1.48117	1.22194
	1.47186	1.21339			0.616819	0.841989			0.543466	0.728537
	0.783343	0.983126			0.714331	0.529295			0.758157	0.973448
	1.16786	1.05739			0.374091	0.41346			0.680168	0.659396
	0.762134	0.748348			0.806299	0.85934			0.438925	0.56583
	1.4877	1.20896			0.342615	0.467457			0.793947	0.990157
	1.04584	1.01936			0.337088	0.460617			0.900329	1.27979
	1.04691	0.706588							0.785119	0.937966
	0.709727	0.485186							1.10945	1.31903
	0.73926	0.462789							0.904794	0.552889
	0.717873	0.769967
	0.662948	0.499962
	0.844532	0.668326
	0.4685	0.42445
	0.704355	0.60378
	1.21581	1.22545

## Sheet: Fig 4C Trp63 Scatter
	1				2				3
	Trp63-		Trp63+		Trp63-		Trp63+		Trp63-		Trp63+
	Sox2	Sox21	Sox2	Sox21	Sox2	Sox21	Sox2	Sox21	Sox2	Sox21	Sox2	Sox21
	0.195299	0.311779	0.487888	0.669177	1.27356	1.12906	0.840015	0.681958	0.503108	0.580583	0.732896	0.80056
	0.564974	0.606164	0.473566	0.638439	1.83155	1.83271	0.959463	0.940675	0.414667	0.412035	0.99444	0.901862
	0.67311	0.763276	0.492927	0.762647	1.0705	0.842078	0.749829	0.792343	1.73375	0.768666	0.696003	0.739278
	1.07962	1.12165	0.659324	0.70718	1.45926	1.51232	0.644378	0.644265	2.11847	2.05343	0.981059	1.05572
	0.746666	0.761949	0.710604	0.700543	1.60557	1.66993	0.753254	1.11284	1.80858	1.76025	1.00248	1.25063
	0.814545	0.952733	0.717817	0.848504	1.12096	0.933835	0.600131	0.496151	1.68773	1.33914	0.883163	1.02806
	1.4232	1.15204	1.49566	0.748257	1.55381	1.69231	0.502884	0.689743	1.66467	1.31398	0.616009	0.599167
	1.04138	0.962513	0.664133	0.772987	1.58726	1.18833	0.816559	0.78674	1.37548	1.75843	1.00332	0.930386
	1.24998	1.1257	0.689555	1.17488	0.996112	1.00158	0.721271	0.549379	1.80653	1.67796	1.06652	0.94361
	1.13499	0.912983	0.585461	0.751959	0.941491	0.961559	0.661406	0.800165	1.6474	1.48383	1.21416	1.33663
	1.11199	1.31111	0.603517	0.623908	0.869644	1.14464	0.664817	0.58689	1.08872	1.34069	0.823989	0.982592
	1.51932	1.54024	0.725259	0.957414	1.20673	1.41099	0.791877	0.619925	1.69159	1.30724	1.08013	0.811797
	1.83876	1.65649	0.694236	0.931706	1.33622	1.85537	0.602809	0.776625	0.845036	0.718966	1.05246	1.04033
	1.00542	1.07527	0.808663	0.778575	1.09481	1.21453	0.69845	0.698548	1.56332	1.43318	0.845797	0.645323
	0.799404	1.15917	0.846873	0.788216	0.982806	1.34048	0.76766	0.689234	1.95601	0.922001	0.776634	0.821737
	2.11695	1.50126	1.00933	0.902365	1.26047	1.33812	0.682169	0.511432	1.25082	1.19903	0.9603	0.747749
	1.20514	1.41583	0.749889	0.623	1.29821	0.639644	0.694644	0.876969	1.63293	1.42886	0.773222	0.726226
	1.18998	1.05633	1.25415	1.28861	0.924843	1.069	0.631762	0.597877	1.27088	1.23533	0.808533	0.889588
	1.38816	1.96485	0.957132	0.740223	1.23088	1.4206	0.650862	0.696874	1.25942	0.594845	0.543003	0.599253
	1.48507	1.43818	0.823395	0.63278	1.60965	1.99312	0.722089	1.03578	0.896009	1.12556	0.578951	0.757861
	1.84577	1.41282	0.947413	0.793385	1.35581	0.519509	0.861201	0.763855	0.829765	1.13212	0.539529	0.9475
	1.46476	1.32026	0.942528	0.967683	1.09601	0.665003	0.885798	0.774843	1.17508	1.19816	0.535912	1.0539
	1.41479	0.942045	1.06	0.903832	0.976448	0.649577	0.851319	0.73122	1.13616	1.17621	0.673867	0.879303
	1.10857	1.51	0.75705	0.831668	1.36695	1.5105	0.834108	0.70819	0.89048	0.969281	0.442414	0.889156
	1.99531	2.10799	1.27438	1.09015	1.45206	1.40317	0.931003	0.890649	0.882485	0.862275	0.493757	0.989075
	1.30742	1.61919	0.824418	1.13458	1.47771	1.45753	1.34008	0.958976	0.955306	0.98968	0.40587	0.594932
	1.47428	1.71489	0.771322	0.862196	1.55233	1.31946	0.924688	0.97553	0.899606	0.902726	0.547545	0.728128
	1.40617	1.32222	0.909688	0.834881	0.93285	1.16039	0.787437	0.846007	0.607705	0.82554	0.374998	0.555344
	1.85971	1.31642	0.406557	0.434312	0.777062	0.886683	0.66796	0.723361	0.503376	0.685083	0.457952	0.559234
	1.3563	1.02266	0.903013	0.823005	1.451	1.57814	0.805973	0.799947
	1.11409	1.02853	0.937515	0.974599	1.08324	1.3423	0.632072	0.640263
	0.986749	0.887834	0.633927	0.688947	1.29308	1.0464	0.560071	0.728746
	0.712855	0.870998	0.609144	0.590446	0.894495	0.813008	0.748659	0.857977
	0.939075	1.00897	0.469039	0.487823	0.688273	1.07369	0.500192	0.470356
			0.53482	0.666801	0.621952	0.640845	0.680167	0.695747
					0.815911	0.888539	0.514217	0.502991
							0.441849	0.453001
							0.493242	0.450054

[truncated: 5 more sheets: Sup Fig 4B Scatter total, Fig 4D MTEC FOXJ1 SCGB3A1, Fig 4E Adult CC10rTta, Sup Fig 4C P63 P73 MTEC culture, Sup Fig 4C Calculations]
