# Supplementary material for: SOX21 modulates SOX2-initiated differentiation of epithelial cells in the extrapulmonary airways
Source: eLife. 2021 Jul 21;10:e57325. doi: 10.7554/eLife.57325 (PMC8331192; doi:10.7554/eLife.57325)
Supplement: Figure 5—source data 1. [file elife-57325-fig5-data1.xlsx]

## Sheet: Mice Naph D5 total
	Naphthalene experiment 2018-06-27										Naphthalene experiment 2018-11-14
		animalid	sex	age	gene and genotype	weight before	weight after	weight loss	% of BW loss			animalid	sex	age	gene and genotype	weight before	weight after	weight loss	% of BW loss
	D5	18-MI12922-07	female	93	2*2 Sox2-CreERT +/Cre	19.7	12.6	7.1	36.0406		D5	18-MI18155-06	female	69	2*2 Sox2-CreERT wt	16.9	11.1	5.8	34.3195
	D5	18-MI12936-03	female	91	2*2 Sox2-CreERT +/Cre	18.5	12.3	6.2	33.5135		D5	18-MI18155-07	female	69	2*2 Sox2-CreERT wt	15.8	11	4.8	30.3797
	D5	18-MI13130-02	male	84	2*2 Sox2-CreERT +/Cre	23	13.8	9.2	40		D5	18-MI18289-08	female	65	2*2 Sox2-CreERT wt	19.7	12.5	7.2	36.5482
	D5	18-MI13130-03	male	84	2*2 Sox2-CreERT +/Cre	27.1	19.2	7.9	29.1513		D5	18-MI18155-02	male	69	2*2 Sox2-CreERT +/Cre	21.7	15.6	6.1	28.1106
	D5	18-MI13339-07	female	79	2*2 Sox2-CreERT +/Cre	19.9	14.3	5.6	28.1407		D5	18-MI18155-04	male	69	2*2 Sox2-CreERT +/Cre	22.5	16.6	5.9	26.2222
	D5	18-MI12936-06	female	91	2*2 Sox2-CreERT wt	21.8	14.9	6.9	31.6514		D5	18-MI18289-06	female	65	2*2 Sox2-CreERT +/Cre	12.8	8.6	4.2	32.8125
	D5	18-MI13339-03	male	79	2*2 Sox2-CreERT wt	24.1	18.1	6	24.8963
	D5	18-MI12931-01	male	92	2*2 Sox2-CreERT wt	27	17.8	9.2	34.0741
	D5	18-MI12931-06	female	92	2*2 Sox2-CreERT wt	22	15.4	6.6	30		Naphthalene experiment 2019-01-03
	D5	18-MI13356-06	female	77	SOX21 KO +/-	19.1	14.7	4.4	23.0366			animalid	sex	age	gene and genotype	weight before	weight after	weight loss	% of BW loss
	D5	18-MI13356-07	female	77	SOX21 KO +/-	17.8	12.2	5.6	31.4607		D5	18-MI18536-07	female	97	2*2 Sox21 KO wt	21.6	14.9	6.7	31.0185
											D5	18-MI18573-03	female	95	2*2 Sox21 KO wt	20.1	14.6	5.5	27.3632
											D5	18-MI18575-07	female	95	2*2 Sox21 KO wt	18.6	12.9	5.7	30.6452
											D5	18-MI18536-05	male	97	2*2 Sox21 KO +/-	27.1	21	6.1	22.5092
											D5	18-MI18575-05	male	95	2*2 Sox21 KO +/-	25	17.7	7.3	29.2
											D5	18-MI18576-08	female	94	2*2 Sox21 KO +/-	19.7	14.6	5.1	25.8883
											D5	18-MI18753-07	female	89	2*2 Sox21 KO +/-	21.6	14.8	6.8	31.4815

## Sheet: Day 5 Napthalene
	18-MI18536-05	male	97	2*2 Sox21 KO +/-							18-MI18536-07	female	97	2*2 Sox21 KO wt								DAPI	KI67	TRP63	KI67/TRP63	TRP63 only	Ki67 only	FOXJ1	SOX9	DAPI	% KI67	%TRP63	%KI67/TRP63	%TRP63 only	% Ki67 only	% FOXJ1	% SOX9
Section	DAPI	KI67	TRP63	KI67/TRP63	FOXJ1	SOX9	DAPI			Section	DAPI	KI67	TRP63	KI67/TRP63	FOXJ1	Sox9	DAPI			Sox2 +/-	18-MI12922-07	468	345	238	209	29	136	23	34	455	73.7179	50.8547	44.6581	6.19658	29.0598	5.05495	7.47253
1	340	278	187	176	8	113	289			1	212	175	131	120	9	27	142				18-MI12936-03	596	406	324	267	57	139	19	22	276	86.7521	54.3624	44.7987	9.56376	23.3221	6.88406	7.97101
2	370	286	178	166	13	114	430			2	124	101	64	62	7	21	143				18-MI13130-02	978	778	450	423	27	355	11	207	832	166.239	46.0123	43.2515	2.76074	36.2986	1.32212	24.8798
3	216	167	117	104	13	102	332			3	205	156	106	94	bad section						18-MI13130-03	874	642	475	405	70	237	109	164	907	137.179	54.3478	46.3387	8.00915	27.1167	12.0176	18.0816
Total	926	731	482	446	26	216	1051			4											18-MI13339-07	780	666	352	323	29	343	1	181	686	142.308	45.1282	41.4103	3.71795	43.9744	0.145773	26.3848
		%KI67	% TRP63	% TRP63 KI67	%FOXJ1		%SOX9			Total	541	432	301	276	16	48	285				18-MI18155-02	2223	1610	1090	940	150	670	19	140	755	344.017	49.0328	42.2852	6.74764	30.1395	2.51656	18.543
		78.9417	52.0518	48.1641	2.47383		20.5519					%KI67	% TRP63	% TRP63 KI67	%FOXJ1	%SOX9					18-MI18155-04	1226	916	524	456	68	460	7	26	642	195.726	42.7406	37.1941	5.54649	37.5204	1.09034	4.04984
			%KI67 of TRP63									79.8521	55.6377	51.0166	5.61404	16.8421					18-MI18289-06	1735	1266	767	692	75	574	93	45	788	270.513	44.2075	39.8847	4.32277	33.0836	11.802	5.71066
			92.5311
	18-MI18575-05	male	95	2*2 Sox21 KO +/-							18-MI18573-03	female	95	2*2 Sox21 KO wt						WT	18-MI12931-01	1199	897	469	408	61	489	32	429	1035	191.667	39.1159	34.0284	5.08757	40.784	3.09179	41.4493
Section	DAPI	KI67	TRP63	KI67/TRP63	FOXJ1	SOX9	DAPI			Section	DAPI	KI67	TRP63	KI67/TRP63	FOXJ1	Sox9	DAPI				18-MI12931-06	1241	976	569	506	63	470	68	211	727	208.547	45.8501	40.7736	5.07655	37.8727	9.35351	29.0234
1	177	118	87	76	2	88	211			1	341	257	194	162	53	26	272				18-MI12936-06	923	687	365	329	36	358	18	228	627	146.795	39.545	35.6446	3.90033	38.7866	2.87081	36.3636
2	202	163	83	78	3	59	150			2	320	208	142	107	47	21	276				18-MI18155-07	1471	1119	622	581	41	538	84	114	721	239.103	42.2842	39.4969	2.78722	36.5738	11.6505	15.8114
3	185	166	98	95	3	75	149			3	283	170	123	101	46	14	269				18-MI18289-08	1993	1492	887	776	111	716	35	150	874	318.803	44.5058	38.9363	5.56949	35.9257	4.00458	17.1625
Total	564	447	268	249	8	222	510	0		4											18-MI18536-07	541	432	301	276	25	156	16	48	285	92.3077	55.6377	51.0166	4.62107	28.8355	5.61404	16.8421
		%KI67	% TRP63	% TRP63 KI67	%FOXJ1		%SOX9			Total	944	635	459	370	146	61	817				18-MI18573-03	944	635	459	370	89	265	146	61	817	135.684	48.6229	39.1949	9.42797	28.072	17.8703	7.46634
		79.2553	47.5177	44.1489	1.56863		43.5294					%KI67	% TRP63	% TRP63 KI67	%FOXJ1	%SOX9					18-MI18575-07	504	376	281	237	44	139	56	101	364	80.3419	55.754	47.0238	8.73016	27.5794	15.3846	27.7473
			%KI67 of TRP63									67.2669	48.6229	39.1949	17.8703	7.46634
			92.9104																	Sox21 +/-	18-MI13356-07	7617	5717	3484	3075	409	2642	66	432	1018	1221.58	45.7398	40.3702	5.36957	34.6856	6.4833	42.4361
	18-MI18576-08	female	94	2*2 Sox21 KO +/-							18-MI18575-07	female	95	2*2 Sox21 KO wt							18-MI18536-05	926	731	482	446	36	285	26	216	1051	156.197	52.0518	48.1641	3.88769	30.7775	2.47383	20.5519
Section	DAPI	KI67	TRP63	KI67/TRP63	FOXJ1	SOX9	DAPI			Section	DAPI	KI67	TRP63	KI67/TRP63	FOXJ1	SOX9	DAPI				18-MI18575-05	564	447	268	249	19	198	8	222	510	95.5128	47.5177	44.1489	3.36879	35.1064	1.56863	43.5294
1	366	268	179	161	27	95	290			1	242	183	148	123	35	51	183				18-MI18576-08	1023	767	498	446	52	321	72	275	863	163.889	48.6804	43.5973	5.08309	31.3783	8.34299	31.8656
2	339	254	175	158	23	89	257			2	192	143	102	88	21	50	181				18-MI18753-07	299	203	165	144	21	59	30	58	244	43.3761	55.1839	48.1605	7.02341	19.7324	12.2951	23.7705
3	318	245	144	127	22	91	316			3	70	50	31	26	bad section
4										Total	504	376	281	237	56	101	364
Total	1023	767	498	446	72	275	863	0				%KI67	% TRP63	% TRP63 KI67	%FOXJ1	%SOX9
		%KI67	% TRP63	% TRP63 KI67	%FOXJ1		%SOX9					74.6032	55.754	47.0238	15.3846	27.7473
		74.9756	48.6804	43.5973	8.34299		31.8656						%KI67 of TRP63
													84.3416
	18-MI18753-07	female	89	2*2 Sox21 KO +/-							18-MI13356-07	female	77	SOX21 KO +/-
Section	DAPI	KI67	TRP63	KI67/TRP63	FOXJ1	SOX9	DAPI			Section	DAPI	KI67	TRP63	KI67/TRP63	FOXJ1	SOX9	DAPI
1	87	57	44	35	9	16	86			1	477	391	163	149	26	145	316
2	106	75	61	54	10	28	94			2	404	321	149	134	21	148	368
3	106	71	60	55	11	14	64			3					19	139	334
Total	299	203	165	144	30	58	244			Total	881	712	312	283	66	432	1018
		%KI67	% TRP63	% TRP63 KI67	%FOXJ1		%SOX9					%KI67	% TRP63	% TRP63 KI67	%FOXJ1	%SOX9
		67.893	55.1839	48.1605	12.2951		23.7705					80.8173	35.4143	32.1226	6.4833	42.4361
	18-MI18155-02	male	69	2*2 Sox2-CreERT +/Cre						18-MI18155-07	female	69	2*2 Sox2-CreERT wt
Section	DAPI	KI67	TRP63	KI67/TRP63	FOXJ1	SOX9	DAPI		Section	DAPI	KI67	TRP63	KI67/TRP63	FOXJ1	SOX9	DAPI
1	290	224	157	150	6	38	211		1	378	270	169	158	41	34	266
2	269	173	134	122	4	38	261		2	365	248	148	134	23	40	228
3	230	138	150	99	9	64	283		3	297	216	165	156	20	40	227
Total	789	535	441	371	19	140	755		4
		%KI67	% TRP63	% TRP63 KI67	%FOXJ1	%SOX9			Total	1040	734	482	448	84	114	721
		67.8074	55.8935	47.0215	2.51656	18.543					%KI67	% TRP63	% TRP63 KI67	%FOXJ1	%SOX9
											247.138	162.29	150.842	11.6505	15.8114
	18-MI18155-04	male	69	2*2 Sox2-CreERT +/Cre
Section	DAPI	KI67	TRP63	KI67/TRP63	FOXJ1	SOX9	DAPI			18-MI18289-08	female	65	2*2 Sox2-CreERT wt
1	232	156	109	90	4	7	221		Section	DAPI	KI67	TRP63	KI67/TRP63	FOXJ1	SOX9	DAPI
2	205	143	61	51	3	7	223		1	327	233	147	131	9	26	251
3	230	168	119	108	0	12	198		2	321	224	143	131	11	49	302
4									3	308	215	141	120	15	75	321
Total	667	467	289	249	7	26	642		Total	956	672	431	382	35	150	874
		%KI67	% TRP63	% TRP63 KI67	%FOXJ1	%SOX9					%KI67	% TRP63	% TRP63 KI67	%FOXJ1	%SOX9
		70.015	43.3283	37.3313	1.09034	4.04984					70.2929	45.0837	39.9582	4.00458	17.1625
	18-MI18289-06	female	65	2*2 Sox2-CreERT +/Cre						18-MI12931-01	male	92	2*2 Sox2-CreERT wt
Section	DAPI	KI67	TRP63	KI67/TRP63	FOXJ1	SOX9	DAPI		Section	DAPI	KI67	TRP63	KI67/TRP63	FOXJ1	SOX9	DAPI
1	217	145	101	92	36	12	283		1	355	269	136	117	11	192	443
2	225	156	121	109	33	13	252		2	395	286	156	135	14	112	329
3	265	194	135	122	24	20	253		3	449	342	177	156	7	125	263
Total	707	495	357	323	93	45	788		Total	1199	897	469	408	32	429	1035
		%KI67	% TRP63	% TRP63 KI67	%FOXJ1	%SOX9					%KI67	% TRP63	% TRP63 KI67	%FOXJ1	%SOX9
		70.0141	50.495	45.686	11.802	5.71066					74.8123	39.1159	34.0284	3.09179	41.4493
										18-MI12931-06	female	92	2*2 Sox2-CreERT wt
	18-MI12922-07	female	93	2*2 Sox2-CreERT +/Cre					Section	DAPI	KI67	TRP63	KI67/TRP63	FOXJ1	SOX9	DAPI
Section	DAPI	KI67	TRP63	KI67/TRP63	FOXJ1	SOX9	DAPI		1	426	335	181	161	24	94	288
1	185	128	90	80	9	15	166		2	347	267	173	151	23	81	285
2	163	125	92	79	8	11	156		3	468	374	215	194	21	36	154
3	120	92	56	50	6	8	133		4
Total	468	345	238	209	23	34	455		Total	1241	976	569	506	68	211	727
		%KI67	% TRP63	% TRP63 KI67	%FOXJ1	%SOX9					%KI67	% TRP63	% TRP63 KI67	%FOXJ1	%SOX9
		73.7179	50.8547	44.6581	5.05495	7.47253					78.6463	45.8501	40.7736	9.35351	29.0234
	18-MI12936-03	female	91	2*2 Sox2-CreERT +/Cre						18-MI12936-06	female	91	2*2 Sox2-CreERT wt
Section	DAPI	KI67	TRP63	KI67/TRP63	FOXJ1	SOX9	DAPI		Section	DAPI	KI67	TRP63	KI67/TRP63	FOXJ1	SOX9	DAPI
1	120	75	60	49	7	16	106		1	326	242	126	109	6	88	241
2	65	48	38	32	12	6	170		2	277	205	112	101	7	92	243
3	181	105	89	69					3	320	240	127	119	5	48	143
4	230	178	137	117					Total	923	687	365	329	18	228	627
Total	596	406	324	267	19	22	276				%KI67	% TRP63	% TRP63 KI67	%FOXJ1	%SOX9
		%KI67	% TRP63	% TRP63 KI67	%FOXJ1	%SOX9					74.4312	39.545	35.6446	2.87081	36.3636
		68.1208	54.3624	44.7987	6.88406	7.97101
	18-MI13130-02	male	84	2*2 Sox2-CreERT +/Cre
Section	DAPI	KI67	TRP63	KI67/TRP63	FOXJ1	SOX9	DAPI
1	385	312	179	171	4	54	310
2	287	227	129	120	1	71	193
3	306	239	142	132	6	82	329
Total	978	778	450	423	11	207	832
		%KI67	% TRP63	% TRP63 KI67	%FOXJ1	%SOX9
		79.5501	46.0123	43.2515	1.32212	24.8798
	18-MI13130-03	male	84	2*2 Sox2-CreERT +/Cre
Section	DAPI	KI67	TRP63	KI67/TRP63	FOXJ1	SOX9	DAPI
1	251	178	144	114	16	38	217
2	284	215	147	124	36	64	325
3	339	249	184	167	57	62	365
Total	874	642	475	405	109	164	907
		%KI67	% TRP63	% TRP63 KI67	%FOXJ1	%SOX9
		73.4554	54.3478	46.3387	12.0176	18.0816
	18-MI13339-07	female	79	2*2 Sox2-CreERT +/Cre
Section	DAPI	KI67	TRP63	KI67/TRP63	FOXJ1	SOX9	DAPI
1	226	192	112	102	0	54	251
2	283	246	116	109	1	63	210
3	271	228	124	112	0	64	225
Total	780	666	352	323		181	686
		%KI67	% TRP63	% TRP63 KI67	%FOXJ1	%SOX9
		85.3846	45.1282	41.4103	0	26.3848

## Sheet: D20 Napthalen
SOX2 +/-			12931.2										12934.3										13130.4										13130.6										13339.6
	Section	Cartilatge ring	Foxj1	Scgb1a1	Dapi	Trp63	KI67	TRP63/KI67	Dapi		Section	Cartilatge ring	Foxj1	Scgb1a1	Dapi	Trp63	KI67	TRP63/KI67	Dapi		Section	Cartilatge ring	Foxj1	Scgb1a1	Dapi	Trp63	KI67	TRP63/KI67	Dapi		Section	Cartilatge ring	Foxj1	Scgb1a1	Dapi	Trp63	KI67	TRP63/KI67	Dapi		Section	Cartilatge ring	Foxj1	Scgb1a1	Dapi	Trp63	KI67	TRP63/KI67	Dapi
	1	Above 1	20	0	244	72	15	11	264		1	Above 1	49	2	214	55	21	13	212		1	Above 1	38	0	265	74	8	5	261		1	Above 1	28	0	286	154	19	13	355		1	Above 1	28	27	286	86	14	9	253
		1-2	8	36	256	118	17	14	259			1-2	24	7	199	59	21	14	205			1-2	15	5	198	36	4	1	162			1-2	17	63	235	102	11	9	241			1-2	17	71	235	117	18	14	299
		3-4	10	87	214	88	13	2	209			3-4	60	36	228	60	10	7	210			3-4	21	32	218	84	10	8	209			3-4	54	73	267	82	11	7	240			3-4	54	21	267	120	21	17	257
		5-6	21	49	265	191	11	8	382			5-6	41	38	237	101	22	14	255			5-6	34	20	273	101	15	12	235			5-6	51	72	351	98	13	4	236			5-6	51	102	351	123	11	9	267
		7-…										7-…										7-…										7-…										7-…
	2	Above 1	7	0	196	102	13	8	241		2	Above 1	39	0	195	65	15	6	238		2	Above 1	49	0	288	73	9	5	251		2	Above 1	20	8	313	141	20	12	326		2	Above 1	20	12	313	35	3	2	254
		1-2	9	36	235	93	13	10	201			1-2	28	14	235	46	13	8	214			1-2	18	5	218	55	14	12	180			1-2	8	14	233	100	12	6	235			1-2	8	59	233	54	5	5	220
		3-4	11	99	222	59	7	4	123			3-4	42	22	210	61	13	9	214			3-4	24	14	248	95	17	8	201			3-4	36	72	264	77	16	8	247			3-4	36	48	264	58	4	3	182
		5-6	14	82	243	122	8	6	232			5-6	28	25	232	69	15	7	186			5-6	39	11	311	105	15	11	238			5-6	29	60	231	116	16	10	303			5-6	29	52	231	70	5	3	213
		7-…										7-…										7-…										7-…										7-…
	3	Above 1	15	0	200	102	20	10	226		3	Above 1	36	0	186	45	12	6	211		3	Above 1	63	0	280	56	7	4	205		3	Above 1	23	0	261	140	27	18	323		3	Above 1	23	23	261	42	6	3	135
		1-2	12	38	199	73	7	4	160			1-2	28	16	196	47	17	9	155			1-2	25	7	194	46	11	5	171			1-2	11	43	216	98	7	5	222			1-2	11	72	216	93	18	11	233
		3-4	13	84	196	112	8	7	230			3-4	59	28	221	41	6	4	165			3-4	23	18	241	92	8	6	232			3-4	41	52	270	65	16	8	211			3-4	41	38	270	157	35	29	312
		5-6	32	112	309	158	12	10	326			5-6	55	16	269	89	30	25	201			5-6	37	23	339	111	13	10	228			5-6	31	93	311	100	23	17	262			5-6	31	105	311	94	25	20	218
		7-…										7-…										7-…										7-…										7-…
	Sum	Above 1	42	0	640	276	48	29	731		Sum	Above 1	124	2	595	165	48	25	661		Sum	Above 1	150	0	833	203	24	14	717		Sum	Above 1	71	8	860	435	66	43	1004		Sum	Above 1	71	62	860	163	23	14	642
		1-2	29	110	690	284	37	28	620			1-2	80	37	630	152	51	31	574			1-2	58	17	610	137	29	18	513			1-2	36	120	684	300	30	20	698			1-2	36	202	684	264	41	30	752
		3-4	34	270	632	259	28	13	562			3-4	161	86	659	162	29	20	589			3-4	68	64	707	271	35	22	642			3-4	131	197	801	224	43	23	698			3-4	131	107	801	335	60	49	751
		5-6	67	243	817	471	31	24	940			5-6	124	79	738	259	67	46	642			5-6	110	54	923	317	43	33	701			5-6	111	225	893	314	52	31	801			5-6	111	259	893	287	41	32	698
		7-…					% of Total	% of Trp63				7-…					% of Total	% of Trp63				7-…					% of Total	% of Trp63				7-…					% of Total	% of Trp63				7-…					% of Total	% of Trp63
	Percentage	Above 1	6.5625	0		37.7565	6.56635	10.5072			Percentage	Above 1	20.8403	0.336134		24.9622	7.26172	15.1515			Percentage	Above 1	18.0072	0		28.3124	3.34728	6.89655			Percentage	Above 1	8.25581	0.930233		43.3267	6.57371	9.88506			Percentage	Above 1	8.25581	7.2093		25.3894	3.58255	8.58896
		1-2	4.2029	15.942		45.8065	5.96774	9.85915				1-2	12.6984	5.87302		26.4808	8.88502	20.3947				1-2	9.5082	2.78689		26.7057	5.65302	13.1387				1-2	5.26316	40		42.9799	4.29799	6.66667				1-2	5.26316	29.5322		35.1064	5.45213	11.3636
		3-4	5.37975	42.7215		46.0854	4.98221	5.01931				3-4	24.431	13.0501		27.5042	4.9236	12.3457				3-4	9.6181	9.05233		42.2118	5.45171	8.11808				3-4	16.3546	87.9464		32.0917	6.16046	10.2679				3-4	16.3546	13.3583		44.6072	7.98935	14.6269
		5-6	8.20073	29.743		50.1064	3.29787	5.09554				5-6	16.8022	10.7046		40.3427	10.4361	17.7606				5-6	11.9177	5.85049		45.2211	6.13409	10.4101				5-6	12.43	71.6561		39.201	6.49189	9.87261				5-6	12.43	29.0034		41.1175	5.87393	11.1498
		7-…										7-…										7-…										7-…										7-…
	Total Sum		172	623	2779	1290	144	94	2853		Total Sum		489	204	2622	738	195	122	2466		Total Sum		386	135	3073	928	131	87	2573		Total Sum		349	550	3238	1273	191	117	3201		Total Sum		349	630	3238	1049	165	125	2843
	Total Perc.		6.18928	22.4181		45.2156	5.04732	7.28682			Total Perc.		18.6499	7.78032		29.927	7.90754	16.5312			Total Perc.		12.561	4.3931		36.0668	5.09133	9.375			Total Perc.		10.7783	16.9858		39.7688	5.96689	9.19089			Total Perc.		10.7783	19.4565		36.8976	5.80373	11.9161
WT			12931.3										12931.4										12931.5										12931.7										17808.01
	Section	Cartilatge ring	Foxj1	Scgb1a1	Dapi	Trp63	KI67	TRP63/KI67	Dapi		Section	Cartilatge ring	Foxj1	Scgb1a1	Dapi	Trp63	KI67	TRP63/KI67	Dapi		Section	Cartilatge ring	Foxj1	Scgb1a1	Dapi	Trp63	KI67	TRP63/KI67	Dapi		Section	Cartilatge ring	Foxj1		Dapi	Trp63	KI67	TRP63/KI67	Dapi		Section	Cartilatge ring	Foxj1	Scgb1a1	Dapi	Trp63	KI67	TRP63/KI67	Dapi
	1	Above 1	33	24	215	103	6	4	268		1	Above 1	23	10	68	25	6	2	86		1	Above 1	75	9	167	81	12	3	272		1	Above 1	80		278	46	9	5	218		1	Above 1	61	15	200	83	8	1	212
		1-2	14	43	206	53	4	0	166			1-2	54	95	216	88	14	7	266			1-2	51	51	207	79	3	1	264			1-2	55		254	53	21	15	280			1-2	1	38	56	51	1	0	139
		3-4	50	66	258	89	4	1	288			3-4	65	89	278	105	6	2	297			3-4	29	84	211	85	3	3	248			3-4	30		220	54	29	15	212			3-4	15	53	82	84	6	2	175
		5-6	35	114	197	46	6	4	169			5-6	41	88	236	131	10	7	327			5-6	70	154	294	109	17	14	325			5-6	58		247	64	21	17	243			5-6	53	113	186	97	14	3	231
		7-…										7-…										7-…										7-…										7-…
	2	Above 1	28	21	192	84	4	2	225		2	Above 1	21	0	81	22	3	2	80		2	Above 1	71	4	297	74	4	2	272		2	Above 1	78		253	76	9	5	348		2	Above 1	38	14	108	104	6	2	259
		1-2	17	44	207	65	5	1	197			1-2	54	33	229	75	11	6	213			1-2	57	68	290	71	7	4	244			1-2	52		254	33	25	8	226			1-2	21	28	131	59	0	0	113
		3-4	33	86	219	83	4	2	284			3-4	47	104	223	98	7	3	271			3-4	47	100	270	86	9	2	249			3-4	21		225	49	34	23	190			3-4	33	73	184	56	4	3	123
		5-6	47	70	247	63	6	5	219			5-6	44	12	221	105	7	4	275			5-6	80	128	349	99	10	7	293			5-6	55		231	73	34	18	293			5-6	42	169	202	179	16	10	366
		7-…										7-…										7-…										7-…										7-…
	3	Above 1	23	8	192	81	4	1	243		3	Above 1	24	0	67	18	2	2	54		3	Above 1	75	12	255	68	5	3	272		3	Above 1	56		172	54	13	8	227		3	Above 1	66	11	256	92	8	2	269
		1-2	18	36	229	55	2	0	173			1-2	71	53	299	66	10	6	195			1-2	72	43	242	82	8	5	271			1-2	55		238	46	27	9	255			1-2	6	31	112	43	2	2	104
		3-4	23	83	222	88	5	0	314			3-4	66	108	250	98	9	2	271			3-4	30	82	215	86	5	3	264			3-4	32		156	44	30	13	196			3-4	14	98	156	86	4	3	188
		5-6	27	80	188	66	8	4	237			5-6	56	187	340	119	3	2	325			5-6	78	170	221	96	10	8	360			5-6	60		218	59	32	16	231			5-6	17	79	97	185	13	8	361
		7-…										7-…										7-…										7-…										7-…
	Sum	Above 1	84	53	599	268	14	7	736		Sum	Above 1	68	10	216	65	11	6	220		Sum	Above 1	221	25	719	223	21	8	816		Sum	Above 1	214		703	176	31	18	793		Sum	Above 1	165	40	564	279	22	5	740
		1-2	49	123	642	173	11	1	536			1-2	179	181	744	229	35	19	674			1-2	180	162	739	232	18	10	779			1-2	162		746	132	73	32	761			1-2	28	97	299	153	3	2	356
		3-4	106	235	699	260	13	3	886			3-4	178	301	751	301	22	7	839			3-4	106	266	696	257	17	8	761			3-4	83		601	147	93	51	598			3-4	62	224	422	226	14	8	486
		5-6	109	264	632	175	20	13	625			5-6	141	287	797	355	20	13	927			5-6	228	452	864	304	37	29	978			5-6	173		696	196	87	51	767			5-6	112	361	485	461	43	21	958
		7-…					% of Total	% of Trp63				7-…					% of Total	% of Trp63				7-…					% of Total	% of Trp63				7-…					% of Total	% of Trp63				7-…					% of Total	% of Trp63
	Percentage	Above 1	14.0234	8.84808		36.413	1.90217	2.61194			Percentage	Above 1	31.4815	4.62963		29.5455	5	9.23077			Percentage	Above 1	30.7371	3.47705		27.3284	2.57353	3.58744			Percentage	Above 1	30.441			22.1942	3.90921	10.2273			Percentage	Above 1	29.2553	7.0922		37.7027	2.97297	1.79211
		1-2	7.6324	19.1589		32.2761	2.05224	0.578035				1-2	24.0591	24.328		33.9763	5.19288	8.29694				1-2	24.3572	21.9215		29.7818	2.31065	4.31034				1-2	21.7158			17.3456	9.59264	24.2424				1-2	9.36455	32.4415		42.9775	0.842697	1.30719
		3-4	15.1645	33.6195		29.3454	1.46727	1.15385				3-4	23.7017	40.0799		35.876	2.62217	2.32558				3-4	15.2299	38.2184		33.7714	2.2339	3.11284				3-4	13.8103			24.5819	15.5518	34.6939				3-4	14.6919	53.0806		46.5021	2.88066	3.53982
		5-6	17.2468	41.7722		28	3.2	7.42857				5-6	17.6913	36.01		38.2956	2.1575	3.66197				5-6	26.3889	52.3148		31.0838	3.78323	9.53947				5-6	24.8563			25.5541	11.3429	26.0204				5-6	23.0928	74.433		48.1211	4.48852	4.55531
		7-…										7-…										7-…										7-…										7-…
	Total Sum		348	675	2572	876	58	24	2783		Total Sum		566	779	2508	950	88	45	2660		Total Sum		735	905	3018	1016	93	55	3334		Total Sum		632		2746	651	284	152	2919		Total Sum		367	722	1770	1119	82	36	2540
	Total Perc.		13.5303	26.2442		31.4768	2.08408	2.73973			Total Perc.		22.5678	31.0606		35.7143	3.30827	4.73684			Total Perc.		24.3539	29.9867		30.4739	2.78944	5.41339			Total Perc.		23.0153			22.3022	9.72936	23.3487			Total Perc.		20.7345	40.791		44.0551	3.22835	3.21716
Sox21 +/-			13356.5										13356.8
	Section	Cartilatge ring	Foxj1	Scgb1a1	Dapi	Trp63	KI67	TRP63/KI67	Dapi		Section	Cartilatge ring	Foxj1	Scgb1a1	Dapi	Trp63	KI67	TRP63/KI67	Dapi
	1	Above 1	67	14	320	114	14	3	349		1	Above 1	82	23	315	72	13	2	285
		1-2	27	76	217	89	7	2	245			1-2	60	21	209	55	10	4	200																														0
		3-4	52	127	236	71	2	2	221			3-4	58	53	209	73	20	12	329
		5-6	88	73	318	35	2	0	139			5-6	65	49	196	58	13	10	226
		7-…										7-…
	2	Above 1	76	9	405	102	19	1	288		2	Above 1	100	16	254	66	14	4	234
		1-2	13	79	257	85	4	1	248			1-2	31	22	136	44	6	3	185
		3-4	92	88	358	84	8	3	254			3-4	89	78	225	55	8	6	202
		5-6	96	127	316	95	9	2	297			5-6	107	118	314	55	4	3	191
		7-…										7-…
	3	Above 1	84	21	291	98	15	0	267		3	Above 1	96	14	257	49	12	2	236
		1-2	22	88	254	91	15	4	259			1-2	65	44	221	54	9	4	221
		3-4	77	130	287	100	11	3	285			3-4	85	70	231	41	5	4	155
		5-6	113	114	270	96	9	2	287			5-6	103	109	289	69	3	2	247
		7-…										7-…
	Sum	Above 1	227	44	1016	314	48	4	904		Sum	Above 1	278	53	826	187	39	8	755
		1-2	62	243	728	265	26	7	752			1-2	156	87	566	153	25	11	606
		3-4	221	345	881	255	21	8	760			3-4	232	201	665	169	33	22	686
		5-6	297	314	904	226	20	4	723			5-6	275	276	799	182	20	15	664
		7-…					% of Total	% of Trp63				7-…					% of Total	% of Trp63
	Percentage	Above 1	22.3425	4.33071		34.7345	5.30973	1.27389			Percentage	Above 1	33.6562	6.41646		24.7682	5.16556	4.27807
		1-2	8.51648	33.3791		35.2394	3.45745	2.64151				1-2	27.5618	15.371		25.2475	4.12541	7.18954
		3-4	25.0851	39.16		33.5526	2.76316	3.13725				3-4	34.8872	30.2256		24.6356	4.8105	13.0178
		5-6	32.854	34.7345		31.2586	2.76625	1.76991				5-6	34.418	34.5432		27.4096	3.01205	8.24176
		7-…										7-…
	Total Sum		807	946	3529	1060	115	23	3139		Total Sum		941	617	2856	691	117	56	2711
	Total Perc.		22.8677	26.8065		33.7687	3.66359	2.16981			Total Perc.		32.9482	21.6036		25.4887	4.31575	8.1042
WT			18534.7												18753.1
	Section	Cartilatge ring	Foxj1	Scgb1a1	Dapi	Trp63	KI67	TRP63/KI67	Dapi			Section	Cartilatge ring		Foxj1	Scgb1a1	Dapi	Trp63	KI67	TRP63/KI67	Dapi
	1	Above 1	114	34	335	78	9	6	385			1	Above 1		51	14	229	38	3	2	175
		1-2	42	42	189	49	10	4	231				1-2		26	23	260	95	13	12	336
		3-4	36	54	211	75	10	4	305				3-4		24	34	267	90	6	3	374
		5-6	14	29	102	32	11	3	98				5-6		15	15	124	56	7	5	232
		7-…											7-…
	2	Above 1	110	29	362	78	4	0	363			2	Above 1		43	12	163	67	13	7	312
		1-2	48	25	237	51	10	3	248				1-2		37	26	271	76	3	2	336
		3-4	35	58	231	63	12	6	248				3-4		36	35	312	68	10	4	329
		5-6	13	25	113	60	8	6	162				5-6		40	40	310	94	8	8	390
		7-…											7-…
	3	Above 1	105	29	339	88	9	3	392			3	Above 1		41	11	154	49	5	0	239
		1-2	39	34	199	43	10	4	262				1-2		57	35	414	88	11	8	332
		3-4	20	60	190	53	19	13	263				3-4		32	33	289	67	8	3	266
		5-6	13	20	102	42	3	3	136				5-6		37	36	264	51	5	3	218
		7-…											7-…
	Sum	Above 1	329	92	1036	244	22	9	1140			Sum	Above 1		135	37	546	154	21	9	726
		1-2	129	101	625	143	30	11	741				1-2		120	84	945	259	27	22	1004
		3-4	91	172	632	191	41	23	816				3-4		92	102	868	225	24	10	969
		5-6	40	74	317	134	22	12	396				5-6		92	91	698	201	20	16	840
		7-…					% of Total	% of Trp63					7-…						% of Total	% of Trp63
	Percentage	Above 1	31.7568	8.88031		21.4035	1.92982	3.68852				Percentage	Above 1		24.7253	6.77656		21.2121	2.89256	5.84416
		1-2	20.64	16.16		19.2982	4.04858	7.69231					1-2		12.6984	8.88889		25.7968	2.68924	8.49421
		3-4	14.3987	27.2152		23.4069	5.02451	12.0419					3-4		10.5991	11.7512		23.2198	2.47678	4.44444
		5-6	12.6183	23.3438		33.8384	5.55556	8.95522					5-6		13.1805	13.0372		23.9286	2.38095	7.9602
		7-…											7-…
	Total Sum		589	439	2610	712	115	55	3093			Total Sum			439	314	3057	839	92	57	3539
	Total Perc.		22.567	16.8199		23.0197	3.71807	7.72472				Total Perc.			14.3605	10.2715		23.7073	2.5996	6.7938
Sox21 +/-			18536.3												18576.3											18576.4											19025.3
	Section	Cartilatge ring	Foxj1	Scgb1a1	Dapi	Trp63	KI67	TRP63/KI67	Dapi			Section	Cartilatge ring		Foxj1	Scgb1a1	Dapi	Trp63	KI67	TRP63/KI67	Dapi			Section	Cartilatge ring	Foxj1	Scgb1a1	Dapi	Trp63	KI67	TRP63/KI67	Dapi			Section	Cartilatge ring	Foxj1	Scgb1a1	Dapi	Trp63	KI67	TRP63/KI67	Dapi
	1	Above 1	40	1	128	32	4	3	94			1	Above 1		23	1	98	29	2	1	89			1	Above 1	80	7	282	84	6	2	318			1	Above 1	85	19	306	76	20	6	300
		1-2	22	8	126	71	5	5	219				1-2		53	23	286	50	9	6	196				1-2	10	3	63	41	2	0	123				1-2	23	8	95	61	3	0	197
		3-4	30	12	180	75	4	4	276				3-4		40	19	239	105	11	4	335				3-4	34	33	219	76	9	4	247				3-4	33	28	99	15	5	1	61
		5-6	55	78	320	49	1	1	181				5-6		32	26	167	52	9	8	133				5-6	25	14	97	53	9	6	149				5-6	52	42	173	21	17	8	91
		7-…											7-…												7-…											7-…
	2	Above 1	51	2	149	35	5	1	109			2	Above 1		8	2	73	62	14	10	185			2	Above 1	69	6	225	79	7	0	310			2	Above 1	72	13	228	119	17	3	367
		1-2	22	2	99	31	5	3	106				1-2		47	29	236	93	11	7	323				1-2	13	5	79	38	1	1	126				1-2	31	18	112	63	9	4	210
		3-4	46	41	224	61	3	1	204				3-4		46	22	234	95	16	13	299				3-4	33	35	187	121	20	14	346				3-4	9	4	40	56	22	11	220
		5-6	32	38	204	120	9	7	388				5-6		45	23	198	60	6	3	187				5-6	32	29	151	57	9	5	180				5-6	74	54	242	51	28	18	197
		7-…											7-…												7-…											7-…
	3	Above 1	51	7	136	56	2	1	191			3	Above 1											3	Above 1	94	11	295	65	9	0	295			3	Above 1	64	24	243	111	20	2	315
		1-2	10	2	85	61	3	2	227				1-2		59	31	221	76	9	7	297				1-2	37	26	181	40	4	1	132				1-2	29	15	131	72	5	2	224
		3-4	43	22	243	59	2	1	235				3-4		44	41	304	124	22	11	393				3-4	52	42	193	59	3	1	212				3-4	3	1	35	62	23	13	197
		5-6	38	36	218	90	15	13	237				5-6		67	37	287	50	5	4	142				5-6	32	32	131	80	6	2	224				5-6	46	35	166	79	18	14	312
		7-…											7-…												7-…											7-…
	Sum	Above 1	142	10	413	123	11	5	394			Sum	Above 1		31	3	171	91	16	11	274			Sum	Above 1	243	24	802	228	22	2	923			Sum	Above 1	221	56	777	306	57	11	982
		1-2	54	12	310	163	13	10	552				1-2		159	83	743	219	29	20	816				1-2	60	34	323	119	7	2	381				1-2	83	41	338	196	17	6	631
		3-4	119	75	647	195	9	6	715				3-4		130	82	777	324	49	28	1027				3-4	119	110	599	256	32	19	805				3-4	45	33	174	133	50	25	478
		5-6	125	152	742	259	25	21	806				5-6		144	86	652	162	20	15	462				5-6	89	75	379	190	24	13	553				5-6	172	131	581	151	63	40	600
		7-…					% of Total	% of Trp63					7-…						% of Total	% of Trp63					7-…					% of Total	% of Trp63					7-…					% of Total	% of Trp63
	Percentage	Above 1	34.3826	2.42131		31.2183	2.79188	4.06504				Percentage	Above 1		18.1287	1.75439		33.2117	5.83942	12.0879				Percentage	Above 1	30.2993	2.99252		24.7021	2.38353	0.877193				Percentage	Above 1	28.4427	7.20721		31.1609	5.80448	3.59477
		1-2	17.4194	3.87097		29.529	2.35507	6.13497					1-2		21.3997	11.1709		26.8382	3.55392	9.13242					1-2	18.5759	10.5263		31.2336	1.83727	1.68067					1-2	24.5562	12.1302		31.0618	2.69414	3.06122
		3-4	18.3926	11.592		27.2727	1.25874	3.07692					3-4		16.731	10.5534		31.5482	4.77118	8.64198					3-4	19.8664	18.3639		31.8012	3.97516	7.42188					3-4	25.8621	18.9655		27.8243	10.4603	18.797
		5-6	16.8464	20.4852		32.134	3.10174	8.10811					5-6		22.0859	13.1902		35.0649	4.329	9.25926					5-6	23.4828	19.7889		34.358	4.33996	6.84211					5-6	29.6041	22.5473		25.1667	10.5	26.4901
		7-…											7-…												7-…											7-…
	Total Sum		440	249	2112	740	58	42	2467			Total Sum			464	254	2343	796	114	74	2579				Total Sum	511	243	2103	793	85	36	2662			Total Sum		521	261	1870	786	187	82	2691
	Total Perc.		20.8333	11.7898		29.9959	2.35103	5.67568				Total Perc.			19.8037	10.8408		30.8647	4.42032	9.29648					Total Perc.	24.2986	11.5549		29.7896	3.19309	4.53972				Total Perc.		27.861	13.9572		29.2085	6.94909	10.4326
	Total
		Sox2 +/-									WT								Sox21+/-
		12931.2	12934.3	13130.4	13130.6	13339.6	13339.5	17811.07			12931.3	12931.4	12931.5	12931.7	17808.01	18534.7	18753.1		13356.5	13356.8	18536.3	18576.3	18576.4	19025.3
	Foxj1	172	489	386	349	349	233	328			348	566	735	632	367	589	439		807	941	440	464	511	521
	Scgb1a1	623	204	135	550	630	286	636			675	566	905		722	439	314		946	617	249	254	243	261
	Dapi	2779	2622	3073	3238	3238	1540	2397			2572	2508	3018	2746	1770	2610	3057		3529	2856	2112	2343	2103	1870
	Trp63	1290	738	928	1273	1049	658	1067			876	950	1016	651	1119	712	839		1060	691	740	796	793	786
	KI67	144	195	131	191	165	107	229			58	88	93	284	82	115	92		115	117	58	114	85	187
	TRP63/KI67	94	122	87	117	125	72	95			24	45	55	152	36	55	57		23	56	42	74	36	82
	Dapi	2853	2466	2573	3201	2843	1542	2623			2783	2660	3334	2919	2540	3093	3539		3139	2711	2467	2579	2662	2691
	TRP63 only	1196	616	841	1156	924	586	972			852	905	961	499	1083	657	782		1037	635	698	722	757	704
	Ki67 only	50	73	44	74	40	35	134			34	43	38	132	46	60	35		92	61	16	40	49	105
	%FOXJ1	6.18928	18.6499	12.561	10.7783	10.7783	15.1299	13.6838			13.5303	22.5678	24.3539	23.0153	20.7345	22.567	14.3605		22.8677	32.9482	20.8333	19.8037	24.2986	27.861
	%SCGB1A1	22.4181	7.78032	4.3931	16.9858	19.4565	18.5714	26.5332			26.2442	22.5678	29.9867		40.791	16.8199	10.2715		26.8065	21.6036	11.7898	10.8408	11.5549	13.9572
	%TRP63	45.2156	29.927	36.0668	39.7688	36.8976	42.6719	40.6786			31.4768	35.7143	30.4739	22.3022	44.0551	23.0197	23.7073		33.7687	25.4887	29.9959	30.8647	29.7896	29.2085
	%KI67	5.04732	7.90754	5.09133	5.96689	5.80373	6.93904	8.73046			2.08408	3.30827	2.78944	9.72936	3.22835	3.71807	2.5996		3.66359	4.31575	2.35103	4.42032	3.19309	6.94909
	%KI67/TRP63	3.29478	4.94728	3.38127	3.65511	4.39676	4.66926	3.62181			0.862379	1.69173	1.64967	5.20726	1.41732	1.77821	1.61062		0.732717	2.06566	1.70247	2.86933	1.35237	3.04719
	%KI67 of TRP63	7.28682	16.5312	9.375	9.19089	11.9161	10.9422	8.90347			2.73973	4.73684	5.41339	23.3487	3.21716	7.72472	6.7938		2.16981	8.1042	5.67568	9.29648	4.53972	10.4326
	TRP63 only	41.9208	24.9797	32.6856	36.1137	32.5009	38.0026	37.0568			30.6144	34.0226	28.8242	17.0949	42.6378	21.2415	22.0966		33.036	23.4231	28.2935	27.9953	28.4373	26.1613
	Ki67only	1.75254	2.96026	1.71007	2.31178	1.40696	2.26978	5.10865			1.2217	1.61654	1.13977	4.5221	1.81102	1.93986	0.98898		2.93087	2.25009	0.648561	1.55099	1.84072	3.9019
														Significant outlier

## Sheet: Cornoil
WT			17811.03										17811.06										18534.01										18753.02										18753.03
			Foxj1	Scgb1a1	Dapi	Trp63	KI67	TRP63/KI67	Dapi				Foxj1	Scgb1a1	Dapi	Trp63	KI67	TRP63/KI67	Dapi				Foxj1	Scgb1a1	Dapi	Trp63	KI67	TRP63/KI67	Dapi				Foxj1	Scgb1a1	Dapi	Trp63	KI67	TRP63/KI67	Dapi				Foxj1	Scgb1a1	Dapi	Trp63	KI67	TRP63/KI67	Dapi
	1	Above 1	80	35	291	88	6	3	304		1	Above 1	137	29	391	87	2	1	293		1	Above 1	19	13	109	77	8	3	174		1	Above 1	16	4	87	45	5	4	143		1	Above 1	61	29	237	77	11	4	271
		1-2	47	61	281	72	7	4	257			1-2	44	32	274	83	11	5	257			1-2	8	8	88	59	5	3	176			1-2	22	14	80	84	2	0	157			1-2	39	52	210	89	9	4	246
		3-4	35	43	226	111	14	6	333			3-4	41	46	194	73	6	4	214			3-4	19	8	188	89	10	5	266			3-4	24	21	123	79	20	15	221			3-4	18	53	162	64	4	3	155
		5-6	38	43	273	83	9	2	297			5-6	43	41	197	40	9	3	122			5-6	26	31	202	40	2	1	160			5-6	30	61	227	141	20	13	361			5-6	33	60	181	132	20	8	320
		7-…										7-…										7-…										7-…										7-…
	2	Above 1	53	22	199	84	10	6	288		2	Above 1	113	29	307	93	5	4	265		2	Above 1	32	9	118	47	3	2	155		2	Above 1	17	8	63	61	14	11	179		2	Above 1	68	21	218	57	4	3	242
		1-2	39	51	273	71	11	4	286			1-2	62	37	270	72	6	1	223			1-2	8	12	86	57	1	0	177			1-2	14	15	88	41	2	0	157			1-2	55	40	246	75	7	3	280
		3-4	29	42	199	66	12	7	206			3-4	48	54	258	64	15	5	197			3-4	26	23	183	63	8	5	216			3-4	19	33	120	67	12	4	204			3-4	11	11	56	50	6	1	143
		5-6				39	8	3	147			5-6	44	40	188	77	9	5	212			5-6	19	16	108	72	5	3	256			5-6	23	38	145	100	19	18	256			5-6	33	48	169	85	21	13	220
		7-…										7-…										7-…										7-…										7-…
	3	Above 1	45	27	210	83	6	5	216		3	Above 1	60	11	161	85	6	5	264		3	Above 1	36	8	143	46	5	1	227		3	Above 1	23	1	84	46	3	3	77		3	Above 1	56	16	202	71	8	4	165
		1-2	40	53	255	80	3	1	253			1-2	21	8	118	85	10	5	274			1-2	12	11	105	65	6	3	220			1-2	5	5	47	34	4	3	94			1-2	37	37	228	47	5	0	147
		3-4	51	55	221	85	17	9	272			3-4	11	9	87	58	8	2	193			3-4	18	18	127	71	9	5	214			3-4	11	11	120	64	13	7	175			3-4	11	21	89	53	7	3	75
		5-6	96	109	389	65	15	9	199			5-6	24	25	126	61	9	6	181			5-6	27	49	212	78	7	3	194			5-6	39	48	216	132	16	8	347			5-6	32	47	158	84	7	5	139
		7-…										7-…										7-…										7-…										7-…
	Sum	Above 1	178	84	700	242	23	12	806		Sum	Above 1	310	69	859	244	14	7	780		Sum	Above 1	87	30	370	170	16	6	556		Sum	Above 1	39	5	234	152	22	18	399		Sum	Above 1	185	66	657	205	23	11	678
		1-2	126	165	809	218	22	12	716			1-2	127	77	662	232	36	15	728			1-2	28	31	279	181	12	6	573			1-2	44	27	215	159	8	3	408			1-2	131	129	684	211	21	7	673
		3-4	115	140	646	235	39	18	752			3-4	100	109	539	208	23	11	619			3-4	63	49	498	223	27	15	696			3-4	49	47	363	210	45	26	600			3-4	40	85	307	167	17	7	373
		5-6	134	152	662	148	24	11	496			5-6	111	106	511	101	18	9	303			5-6	72	96	522	190	14	7	610			5-6	88	142	588	373	55	39	964			5-6	98	155	508	301	48	26	679
		7-…					% of Total	% of Trp63				7-…					% of Total	% of Trp63				7-…				0	0	0	0			7-…	23		0	0						7-…	0		0	0	0	0	0
	Percentage	Above 1	25.4286	12		30.0248	2.8536	4.95868			Percentage	Above 1	36.0885	8.0326		31.2821	1.79487	2.86885			Percentage	Above 1	23.5135	8.10811		30.5755	2.8777	3.52941			Percentage	Above 1	16.6667	2.13675		38.0952	% of Total	% of Trp63			Percentage	Above 1	28.1583	10.0457		30.236	% of Total	% of Trp63
		1-2	15.5748	20.3956		30.4469	3.07263	5.50459				1-2	19.1843	11.6314		31.8681	4.94505	6.46552				1-2	10.0358	11.1111		31.5881	2.09424	3.31492				1-2	20.4651	12.5581		38.9706	5.51378	11.8421				1-2	19.152	18.8596		31.3522	3.39233	5.36585
		3-4	17.8019	21.6718		31.25	5.18617	7.65957				3-4	18.5529	20.2226		33.6026	3.71567	5.28846				3-4	12.6506	9.83936		32.0402	3.87931	6.72646				3-4	13.4986	12.9477		35	1.96078	1.88679				3-4	13.0293	27.6873		44.7721	3.12036	3.31754
		5-6	20.2417	22.9607		29.8387	4.83871	7.43243				5-6	21.7221	20.7436		33.3333	5.94059	8.91089				5-6	13.7931	18.3908		31.1475	2.29508	3.68421				5-6	14.966	24.1497		38.6929	7.5	12.381				5-6	19.2913	30.5118		44.3299	4.55764	4.19162
		7-…										7-…										7-…										7-…					5.70539	10.4558				7-…					7.06922	8.63787
	Total Sum		553	541	2817	843	108	53	2770		Total Sum		648	361	2571	785	91	42	2430		Total Sum		250	206	1669	764	69	34	2435		Total Sum		220	221	1400	894	130	86	2371		Total Sum		454	435	2156	884	109	51	2403
	Total Perc.		19.6308	19.2048		30.4332	3.89892	6.28707			Total Perc.		25.2042	14.0412		32.3045	3.74486	5.35032			Total Perc.		14.979	12.3427		31.3758	2.83368	4.45026			Total Perc.		15.7143	15.7857		37.7056	5.48292	9.61969			Total Perc.		21.0575	20.1763		36.7873	4.536	5.76923
S2+/-			17811.01										17811.02										17811.10 (Foxj1, new staining)
			Foxj1	Scgb1a1	Dapi	Trp63	KI67	TRP63/KI67	Dapi				Foxj1	Scgb1a1	Dapi	Trp63	KI67	TRP63/KI67	Dapi				Foxj1	Scgb1a1	Dapi	Trp63	KI67	TRP63/KI67	Dapi
	1	Above 1	51	31	243	79	13	10	213		1	Above 1	69	21	256	72	6	4	251		1	Above 1	34	17	180	57	14	2	225
		1-2	57	37	237	64	11	8	229			1-2	34	23	230	62	8	3	227			1-2	48	19	176	105	12	8	356
		3-4	33	41	184	64	13	13	173			3-4	29	28	200	57	6	2	203			3-4	39	42	169	64	7	1	306
		5-6	22	41	170	64	13	7	196			5-6	41	47	230	101	17	14	346			5-6	18	16	99	26	5	1	104
		7-…										7-…										7-…
	2	Above 1	37	22	164	59	13	7	206		2	Above 1	64	15	242	64	9	5	260		3	Above 1	22	21	190	52	8	3	243
		1-2	54	22	238	69	8	6	272			1-2	24	22	223	63	6	5	214			1-2	31	42	242	89	12	3	340
		3-4	28	36	176	58	5	3	221			3-4	27	16	152	56	13	12	174			3-4	45	40	201	71	13	6	310
		5-6	17	60	200	61	8	3	191			5-6	7	10	63	38	4	2	153			5-6	17	32	130	5	5	1	37
		7-…										7-…										7-…
	3	Above 1	27	13	154	33	7	5	77		3	Above 1	84	25	251	68	7	5	256		4	Above 1	33	16	172	65	13	2	231
		1-2	55	55	243	32	6	6	86			1-2	32	32	181	55	2	1	201			1-2	45	35	227	112	13	7	323
		3-4	34	34	200	34	6	3	84			3-4	27	22	144	55	6	4	194			3-4	26	44	193	84	12	2	327
		5-6	14	31	141	44	8	7	95			5-6	28	20	133	73	21	9	250			5-6	27	34	169	20	2	0	61
		7-…										7-…										7-…
	Sum	Above 1	115	66	561	181	28	21	562		Sum	Above 1	217	61	749	203	19	14	721		Sum	Above 1	89	54	542	211	39	7	796
		1-2	166	114	718	154	22	17	536			1-2	90	77	634	173	23	16	602			1-2	124	96	645	288	38	21	989
		3-4	95	111	560	159	27	19	448			3-4	83	66	496	150	16	8	550			3-4	110	126	563	153	24	4	670
		5-6	53	132	511	108	21	14	291			5-6	76	77	426	174	38	23	596			5-6	62	82	398	46	7	1	165
		7-…					% of Total	% of Trp63				7-…					% of Total	% of Trp63				7-…					% of Total	% of Trp63
	Percentage	Above 1	20.4991	11.7647		32.2064	4.98221	11.6022			Percentage	Above 1	28.972	8.14419		28.1553	2.63523	6.89655			Percentage	Above 1	16.4207	9.9631		26.5075	4.8995	3.31754
		1-2	23.1198	15.8774		28.7313	4.10448	11.039				1-2	14.1956	12.1451		28.7375	3.8206	9.24855				1-2	19.2248	14.8837		29.1203	3.84226	7.29167
		3-4	16.9643	19.8214		35.4911	6.02679	11.9497				3-4	16.7339	13.3065		27.2727	2.90909	5.33333				3-4	19.5382	22.3801		22.8358	3.58209	2.61438
		5-6	10.3718	25.8317		37.1134	7.21649	12.963				5-6	17.8404	18.0751		29.1946	6.37584	13.2184				5-6	15.5779	20.603		27.8788	4.24242	2.17391
		7-…										7-…										7-…
	Total Sum		429	423	2350	602	98	71	1837		Total Sum		466	281	2305	700	96	61	2469		Total Sum		385	358	2148	698	108	33	2620
	Total Perc.		18.2553	18		32.7708	5.33478	11.794			Total Perc.		20.2169	12.1909		28.3516	3.88821	8.71429			Total Perc.		17.9236	16.6667		26.6412	4.12214	4.72779
Sox21+/-			18753.05										19025.04										18753.06										18573.07
			Foxj1	Scgb1a1	Dapi	Trp63	KI67	TRP63/KI67	Dapi				Foxj1	Scgb1a1	Dapi	Trp63	KI67	TRP63/KI67	Dapi				Foxj1	Scgb1a1	Dapi	Trp63	KI67	TRP63/KI67	Dapi				Foxj1	Scgb1a1	Dapi	Trp63	KI67	TRP63/KI67	Dapi
	1	Above 1	59	7	157	79	11	6	240		1	Above 1	104	12	275	73	1	0	270		1	Above 1	14	4	59	22	2	2	76		1	Above 1	104	9	241	112	6	1	291
		1-2	63	24	274	124	19	10	358			1-2	68	28	290	37	3	0	183			1-2	18	30	139	50	2	1	133			1-2	44	18	164	105	4	0	233
		3-4	47	25	233	76	9	7	259			3-4	42	32	212							3-4	26	41	204	70	4	0	187			3-4	37	29	151	77	5	0	219
		5-6	76	46	298	39	5	5	150			5-6	72	20	304							5-6	25	36	149	65	4	3	175			5-6	40	30	122	83	5	0	217
		7-…										7-…										7-…										7-…
	2	Above 1	53	6	154	89	4	2	298		2	Above 1	124	18	335	61	2	1	288		2	Above 1	17	5	65	26	3	3	66		2	Above 1	129	14	333	90	2	1	246
		1-2	62	25	260	97	4	4	333			1-2	69	32	228	55	4	2	259			1-2	16	15	107	67	3	3	173			1-2	43	17	194	72	8	1	202
		3-4	46	29	253	69	2	2	228			3-4	42	33	221	61	1	1	234			3-4	16	42	174	61	4	3	160			3-4	30	12	123	71	2	0	208
		5-6	40	45	208	27	1	0	90			5-6	56	27	190	67	8	2	248			5-6	34	50	258	101	17	14	245			5-6	47	39	183	55	1	0	147
		7-…										7-…				6	0	0	21			7-…										7-…
	3	Above 1	81	4	218	70	11	7	255		3	Above 1	121	11	338	74	9	6	308		3	Above 1	11	4	49	22	1	0	67		3	Above 1	213	21	385	49	2	2	186
		1-2	58	23	257	118	18	15	370			1-2	49	21	162	50	1	1	217			1-2	13	33	144	64	4	4	143			1-2	38	1	210	105	5	1	237
		3-4	44	36	229	92	15	9	300			3-4	41	32	192	54	4	2	216			3-4	20	33	183	99	7	7	231			3-4	56	30	306	68	6	0	203
		5-6	36	24	146	38	4	3	145			5-6	43	9	145	56	6	3	213			5-6	49	69	293	86	12	10	221			5-6	43	27	199	65	8	1	174
		7-…										7-…										7-…										7-…
	Sum	Above 1	193	17	529	238	26	15	793		Sum	Above 1	349	41	948	208	12	7	866		Sum	Above 1	42	13	173	70	6	5	209		Sum	Above 1	446	44	959	251	10	4	723
		1-2	183	72	791	339	41	29	1061			1-2	186	81	680	142	8	3	659			1-2	47	78	390	181	9	8	449			1-2	125	36	568	282	17	2	672
		3-4	137	90	715	237	26	18	787			3-4	125	97	625	115	5	3	450			3-4	62	116	561	230	15	10	578			3-4	123	71	580	216	13	0	630
		5-6	152	115	652	104	10	8	385			5-6	171	56	639	123	14	5	461			5-6	108	155	700	252	33	27	641			5-6	130	96	504	203	14	1	538
		7-…	0		0	0	0	0	0			7-…	0		0	6	0	0	21			7-…	0		0	0	0	0	0			7-…			0	0	0	0	0
	Percentage	Above 1	36.4839	3.21361		30.0126	% of Total	% of Trp63			Percentage	Above 1	36.8143	4.32489			% of Total	% of Trp63			Percentage	Above 1	24.2775	7.51445			% of Total	% of Trp63			Percentage	Above 1	46.5068	4.58811			% of Total	% of Trp63
		1-2	23.1353	9.1024		31.951	3.27869	6.30252				1-2	27.3529	11.9118		24.0185	1.38568	3.36538				1-2	12.0513	20		33.4928	2.87081	7.14286				1-2	22.007	6.33803		34.7165	1.38313	1.59363
		3-4	19.1608	12.5874		30.1144	3.86428	8.55457				3-4	20	15.52		21.5478	1.21396	2.11268				3-4	11.0517	20.6774		40.3118	2.00445	4.41989				3-4	21.2069	12.2414		41.9643	2.52976	0.70922
		5-6	23.3129	17.638		27.013	3.30368	7.59494				5-6	26.7606	8.76369		25.5556	1.11111	2.6087				5-6	15.4286	22.1429		39.7924	2.59516	4.34783				5-6	25.7937	19.0476		34.2857	2.06349	0
		7-…					2.5974	7.69231				7-…				26.6811	3.03688	4.06504				7-…				39.3136	5.14821	10.7143				7-…				37.7323	2.60223	0.492611
	Total Sum		665	294	2687	918	103	70	3026		Total Sum		831	275	2892	594	39	18	2457		Total Sum		259	362	1824	733	63	50	1877		Total Sum		824	247	2611	952	54	7	2563
	Total Perc.		24.7488	10.9416		30.3371	3.40383	7.62527			Total Perc.		28.7344	9.50899		24.1758	1.5873	3.0303			Total Perc.		14.1996	19.8465		39.0517	3.35642	6.82128			Total Perc.		31.5588	9.45998		37.144	2.10691	0.735294
		Sox2 +/-				WT						Sox21+/-
		17811.01	17811.02	17811.10		17811.03	17811.06	18534.01	18753.02	18753.03		18753.05	19025.04	18753.6	18573.7	18534.4
	Foxj1	429	466	385		553	648	250	220	454		665	831	259	824	408
	Scgb1a1	423	281	358		541	361	206	221	435		294	275	362	247	287
	Dapi	2350	2305	2148		2817	2571	1669	1400	2156		2687	2892	1824	2611	1715
	Trp63	602	700	698		843	785	764	894	884		918	594	733	952	600
	KI67	98	96	108		108	91	69	130	109		103	39	63	54	79
	TRP63/KI67	71	61	33		53	42	34	86	51		70	18	50	7	57
	Dapi	1837	2469	2620		2770	2430	2435	2371	2403		3026	2457	1877	2563	1872
	TRP63 only	531	639	665		790	743	730	808	833		848	576	683	945	543
	Ki67 only	27	35	75		55	49	35	44	58		33	21	13	47	22
	%FOXJ1	18.2553	20.2169	17.9236		19.6308	25.2042	14.979	15.7143	21.0575		24.7488	28.7344	14.1996	31.5588	23.7901
	%SCGB1A1	18	12.1909	16.6667		19.2048	14.0412	12.3427	15.7857	20.1763		10.9416	9.50899	19.8465	9.45998	16.7347
	%TRP63	32.7708	28.3516	26.6412		30.4332	32.3045	31.3758	37.7056	36.7873		30.3371	24.1758	39.0517	37.144	32.0513
	%KI67	5.33478	3.88821	4.12214		3.89892	3.74486	2.83368	5.48292	4.536		3.40383	1.5873	3.35642	2.10691	4.22009
	%KI67/TRP63	3.865	2.47064	1.25954		1.91336	1.7284	1.3963	3.62716	2.12235		2.31328	0.732601	2.66383	0.273117	3.04487
	%KI67 of TRP63	11.794	8.71429	4.72779		6.28707	5.35032	4.45026	9.61969	5.76923		7.62527	3.0303	6.82128	0.735294	9.5
	TRP63 only	28.9058	25.8809	25.3817		28.5199	30.5761	29.9795	34.0784	34.665		28.0238	23.4432	36.3879	36.8709	29.0064
	Ki67only	1.46979	1.41758	2.8626		1.98556	2.01646	1.43737	1.85576	2.41365		1.09055	0.854701	0.692595	1.83379	1.17521
