# Supplementary material for: SOX21 modulates SOX2-initiated differentiation of epithelial cells in the extrapulmonary airways
Source: eLife. 2021 Jul 21;10:e57325. doi: 10.7554/eLife.57325 (PMC8331192; doi:10.7554/eLife.57325)
Supplement: Figure 7—source data 1. [file elife-57325-fig7-data1.xlsx]

## Sheet: Fig.7B S6CFOXJ1TRP63 S2 S21 int
	TRP63 and FOXJ1 different staining. Cannot take average of Total. No Trp63- fraction. Basal all TRP63+								Luminal = complete int of FOXJ1+ and FOXJ- together in luminal plane
			Mean Fluorescence int.				Compared to total				Foxj1 / luminal
	# image	Donor 21	S2 int	S21 int	Foxj1	DAPI	S2 int	S21 int	Foxj1	DAPI	S2 int	S21 int	Foxj1	DAPI
	1	Foxj1+	23347	30015	36595	28987	1.21862	1.21141	-	1.01164	1.20122	1.01929	1.6321	0.868056
		Foxj1-	18472	29545	19458	34167	0.964167	1.19244	-	1.19242	0.950401	1.00333	0.867808	1.02318
	Basal	Trp63+	18881	20107	29424	23914	0.985516	0.811519	-	0.834593
		Luminal	19436	29447	22422	33393	1.01448	1.18848	-	1.16541
		Total	19158.5	24777		28653.5
	2	Foxj1+	24912	30777	39987	25418	1.28631	1.20843	-	0.964978	1.24225	0.979411	1.74807	0.889488
		Foxj1-	18877	31645	18942	29244	0.974699	1.24252	-	1.11023	0.941308	1.00703	0.828066	1.02338
	Basal	Trp63+	18680	19513	30236	24105	0.964527	0.766162	-	0.915131
		Luminal	20054	31424	22875	28576	1.03547	1.23384	-	1.08487
		Total	19367	25468.5		26340.5
	3	Foxj1+	38898	30557	47610	27776	1.44043	1.14266	-	0.913985	1.26243	0.930453	1.75949	0.867295
		Foxj1-	28506	33587	21674	33042	1.0556	1.25596	-	1.08727	0.925159	1.02272	0.80099	1.03172
	Basal	Trp63+	23197	20643	32576	28754	0.859005	0.771932	-	0.946167
		Luminal	30812	32841	27059	32026	1.141	1.22807	-	1.05383
		Total	27004.5	26742		30390
	4	Foxj1+	28254	27537	48734	27639	1.30368	1.08595	-	0.945796	1.15771	0.907823	1.74887	0.865883
		Foxj1-	22839	31418	20385	33229	1.05382	1.239	-	1.13708	0.935833	1.03577	0.731537	1.04101
	Basal	Trp63+	18940	20382	32502	26526	0.873919	0.803786	-	0.90771
		Luminal	24405	30333	27866	31920	1.12608	1.19621	-	1.09229
		Total	21672.5	25357.5		29223												21	S2	S21
																		basal	0.903301	0.796602
	5	Foxj1+	44672	32544	45289	31030	1.45937	1.03958	-	0.920539	1.25111	0.888234	1.78205	0.844101				luminal	1.0967	1.2034
		Foxj1-	33353	37665	20777	37955	1.08959	1.20316	-	1.12598	0.934101	1.028	0.817542	1.03248								0.903301	1.0967
	Basal	Trp63+	25515	25971	38909	30656	0.833538	0.829612	-	0.909444								5				0.632165	1.36783
		Luminal	35706	36639	25414	36761	1.16646	1.17039	-	1.09056								basal	0.632165	0.811406		0.555194	1.44481
		Total	30610.5	31305		33708.5				DAPI	S2	S21	FOXJ1	DAPI				luminal	1.36783	1.18859
	Total								-	0.951387	1.22294	0.945042	1.73412	0.866965	Foxj1+	Divided by luminal
									-	1.1306	0.93736	1.01937	0.809189	1.03035	Foxj1-			22
									-	0.902609								basal	0.555194	0.667252
									-	1.09739								luminal	1.44481	1.25775
			Mean Fluorescence int.				Compared to total				Foxj1 / luminal
	# image	Donor 5	S2 int	S21 int	Foxj1/Trp63	DAPI	S2 int	S21 int	Foxj1/Trp63	DAPI	S2 int	S21 int	Foxj1	DAPI
	1	Foxj1+	55551	45721	61895	38477	1.52783	1.11119	-	0.836484	1.13792	0.897881	1.97741	0.742914
		Foxj1-	46035	52704	24214	54012	1.26611	1.2809	-	1.17421	0.942992	1.03502	0.773586	1.04286
	Basal	Trp63+	23901	31371	44703	40205	0.657352	0.762431	-	0.87405
		Luminal	48818	50921	31301	51792	1.34265	1.23757	-	1.12595
		Total	36359.5	41146		45998.5
	2	Foxj1+	54540	42725	58707	35277	1.38384	0.955485	-	0.629126	1.09911	0.870677	2.17047	0.666232
		Foxj1-	48126	50156	22928	54597	1.2211	1.12167	-	0.973677	0.969852	1.02211	0.847678	1.0311
	Basal	Trp63+	29202	40360	54701	59196	0.740942	0.902595	-	1.0557
		Luminal	49622	49071	27048	52950	1.25906	1.0974	-	0.944305
		Total	39412	44715.5		56073
	3	Foxj1+	54248	48186	58946	37221	1.50064	1.02988	-	0.721862	1.1703	0.914554	1.84247	0.792459
		Foxj1-	43849	54176	26652	48462	1.21297	1.1579	-	0.939869	0.945959	1.02824	0.833057	1.03179
	Basal	TRP63+	25946	40888	59793	56156	0.717732	0.873899	-	1.08909
		Luminal	46354	52688	31993	46969	1.28227	1.1261	-	0.910914
		Total	36150	46788		51562.5
	4	Foxj1+	58728	47908	48720	35365	1.4756	1.04822	-	0.792688	1.03615	0.87115	1.51243	0.727495
		Foxj1-	52153	58045	25712	51912	1.31039	1.27002	-	1.16358	0.920147	1.05548	0.798187	1.06788
	Basal	TRP63+	22920	36414	53187	40616	0.575887	0.796736	-	0.910387
		Luminal	56679	54994	32213	48612	1.42411	1.20326	-	1.08961
		Total	39799.5	45704		44614
	5	Foxj1+	79012	53835	56737	46592	1.80669	1.12791	-	0.983877	1.18001	0.882122	1.70187	0.800784
		Foxj1-	63017	62687	28641	59781	1.44095	1.31337	-	1.26239	0.941128	1.02717	0.85911	1.02747
	Basal	TRP63+	20507	34431	42827	36528	0.468914	0.72137	-	0.771357
		Luminal	66959	61029	33338	58183	1.53109	1.27863	-	1.22864
		Total	43733	47730		47355.5				DAPI	S2	S21	FOXJ1	DAPI
	Total								-	0.792808	1.1247	0.887277	1.84093	0.745977	Foxj1+	Divided by luminal
									-	1.10275	0.944016	1.0336	0.822324	1.04022	Foxj1-
									-	0.940115
									-	1.05988
			Mean Fluorescence int.				Compared to total				Foxj1 / luminal
	# image	Donor 22	S2 int	S21 int	Foxj1/Trp63	DAPI	S2 int	S21 int	Foxj1	DAPI	S2 int	S21 int	Foxj1	DAPI
	1	Foxj1+		59279	66766	50857		0.986807	-	0.825132		0.746098	2.50943	0.740988
		Foxj1-		82937	19667	71706		1.38064	-	1.1634		1.04386	0.739194	1.04476
	Basal	TRP63+		40691	74260	54636		0.677376	-	0.886444
		Luminal		79452	26606	68634		1.32262	-	1.11356
		Total		60071.5		61635
	2	Foxj1+		59024	77762	52110		0.982562	-	0.845461		0.791493	2.94453	0.751709
		Foxj1-		76367	20483	71308		1.27127	-	1.15694		1.02406	0.775607	1.02865
	Basal	TRP63+		44276	71804	58193		0.737055	-	0.944155
		Luminal		74573	26409	69322		1.2414	-	1.12472
		Total		60071.5		61635
	3	Foxj1+		70442	67790	51070		1.17264	-	0.828588		0.87409	2.17269	0.834286
		Foxj1-		83168	21903	63791		1.38448	-	1.03498		1.032	0.701997	1.0421
	Basal	TRP63+		41405	62150	56275		0.689262	-	0.913036
		Luminal		80589	31201	61214		1.34155	-	0.993169
		Total		60071.5		61635
	4	Foxj1+		65125	61398	42086		1.08412	-	0.682826		0.879212	2.18935	0.88535
		Foxj1-		76547	18816	49044		1.27426	-	0.795717		1.03341	0.670946	1.03172
	Basal	TRP63+		36230	72254	42081		0.603115	-	0.682745
		Luminal		74072	28044	47536		1.23306	-	0.77125
		Total		60071.5		61635
	5	Foxj1+		60168	59195	74636		1.00161	-	1.21094		0.870877	1.83278	0.892786
		Foxj1-		73378	19367	87908		1.22151	-	1.42627		1.06208	0.599635	1.05154
	Basal	TRP63+		37812	68339	61446		0.62945	-	0.996934
		Luminal		69089	32298	83599		1.15011	-	1.35636
		Total		60071.5		61635				DAPI	S2	S21	FOXJ1	DAPI
	Total									0.878588		0.832354	2.32975	0.821024	Foxj1+	Divided by luminal
										1.11546		1.03908	0.697476	1.03975	Foxj1-
										0.884663
										1.07181
			Mean Fluorescence int.				Compared to total				Foxj1 / luminal
		Pat22	S2 int	S21 int	Foxj1/Trp63	DAPI	S2 int	S21 int	Foxj1	DAPI	S2 int	S21 int	Foxj1	DAPI
	1	Foxj1+	111519		105987	49832	-	-	-	-	1.56727		2.74272	0.925901
		Foxj1-	64712		28082	53820	-	-	-	-	0.909451		0.726703	1.0096
	Basal	TRP63+					-	-	-	-
		Luminal	71155		38643	53308	-	-	-	-
		Total
	2	Foxj1+	77340		100547	34176	2.05667	-	-	0.803517	1.4194		2.60168	0.85753
		Foxj1-	49610		25990	39854	1.31926	-	-	0.937014	0.910476		0.672497	1.02342
	Basal	TRP63+	20721		56151	46124	0.551024	-	-	1.08443
		Luminal	54488		38647	38942	1.44898	-	-	0.915571
		Total	37604.5		47399	42533
	3	Foxj1+	80834		50276	34135	1.91405	-	-	0.922767	1.32913		2.06999	0.892932
		Foxj1-	55715		18723	38228	1.31926	-	-	1.03341	0.916109		0.770875	1.01312
	Basal	TRP63+	23647		37808	36251	0.559931	-	-	0.979969
		Luminal	60817		24288	37733	1.44007	-	-	1.02003
		Total	42232		31048	36992
	4	Foxj1+	77365		68729	66300	1.76367	-	-	1.15162	1.21437		1.84845	0.965712
		Foxj1-	58109		25789	68654	1.32469	-	-	1.19251	0.912115		0.693588	1.00579
	Basal	TRP63+	24024		60084	46883	0.547668	-	-	0.814351
		Luminal	63708		37182	68259	1.45233	-	-	1.18565
		Total	43866		48633	57571
	5	Foxj1+	123615		65645	52093	2.13508	-	-	1.24929	1.48492		2.10475	1.0322
		Foxj1-	74135		23714	50468	1.28046	-	-	1.21032	0.890543		0.760332	0.992039
	Basal	TRP63+	32547		42599	32523	0.562153	-	-	0.779965
		Luminal	83247		31189	50873	1.43785	-	-	1.22003
		Total	57897		36894	41698				DAPI	S2	S21	FOXJ1	DAPI
	Total	Foxj1+			Divided by total	Foxj1+	1.96737	-	-	1.0318	1.40302		2.27352	0.934855	Foxj1+	Divided by luminal
		Foxj1-				Foxj1-	1.31092	-	-	1.09331	0.907739		0.724799	1.00879	Foxj1-
						Basal	0.555194	-	-	0.914678
						Luminal	1.44481	-	-	1.08532

## Sheet: Fig. 7C DOTPLOT SOX21
		Donor 22	SOX21	Norm				Donor 9	Sox21	Norm
	Foxj1+	1	23867	0.673724	1	0.75	Foxj1+	1	29881	1.10318	1	1.01
	Trp63-Foxj-	2	25614	0.723038	1	0.763	Trp63-Foxj-	2	35847	1.32344	1	1.023
	TRP63+	3	38147	1.07682	1	0.776	TRP63+	3	30599	1.12969	1	1.036
		4	45697	1.28995	1	0.789		4	26155	0.965618	1	1.049
		5	27958	0.789205	1	0.802		5	27032	0.997996	1	1.062
		6	32936	0.929726	1	0.815		6	31617	1.16727	1	1.075
		7	38022	1.07329	1	0.828		7	23967	0.884839	1	1.088
		8	22083	0.623364	1	0.841		8	27126	1.00147	1	1.101
		9	32198	0.908893	1	0.854		9	32131	1.18625	1	1.114
		10	40245	1.13605	1	0.867		10	38207	1.41057	1	1.127
		11	27016	0.762614	1	0.88		11	39215	1.44778	1	1.14
		12	31554	0.890714	1	0.893		12	37239	1.37483	1	1.153
		13	37253	1.05159	1	0.906		13	28003	1.03384	1	1.166
		14	42119	1.18895	1	0.919		14	26478	0.977542	1	1.179
		15	32237	0.909994	1	0.932		15	38096	1.40647	1	1.192
		16	42354	1.19558	1	0.945		16	21863	0.807161	1	1.205
		17	32651	0.921681	1	0.958		17	22211	0.820009	1	1.218
		18	24465	0.690604	1	0.971		18	26840	0.990907	1	1.231
		19	43004	1.21393	1	0.984		19	27000	0.996814	1	1.244
		20	28560	0.806199	1	0.997		20	20804	0.768064	2	1.257
		21	63797	1.80088	2	1.75		21	38389	1.41729	2	2.01
		22	67121	1.89471	2	1.76		22	37791	1.39521	2	2.02
		23	63815	1.80139	2	1.77		23	34686	1.28057	2	2.03
		24	72541	2.04771	2	1.78		24	35195	1.29937	2	2.04
		25	55618	1.57	2	1.79		25	38344	1.41562	2	2.05
		26	56511	1.59521	2	1.8		26	41668	1.53834	2	2.06
		27	61489	1.73573	2	1.81		27	33262	1.228	2	2.07
		28	61255	1.72912	2	1.82		28	34067	1.25772	2	2.08
		29	72274	2.04017	2	1.83		29	32228	1.18983	2	2.09
		30	42518	1.20021	2	1.84		30	40751	1.50449	2	2.1
		31	42339	1.19516	2	1.85		31	28572	1.05485	2	2.11
		32	39365	1.1112	2	1.86		32	32206	1.18901	2	2.12
		33	38309	1.0814	2	1.87		33	31752	1.17225	2	2.13
		34	34241	0.966563	2	1.88		34	28916	1.06755	2	2.14
		35	40151	1.13339	2	1.89		35	30163	1.11359	2	2.15
		36	49351	1.39309	2	1.9		36	31721	1.17111	2	2.16
		37	41064	1.15916	2	1.91		37	27110	1.00088	2	2.17
		38	32982	0.931024	2	1.92		38	27235	1.00549	2	2.18
		39	39900	1.12631	2	1.93		39	33148	1.22379	2	2.19
		40	43896	1.23911	2	1.94		40	31194	1.15165	2	2.2
		41	42342	1.19524	2	1.95		41	30367	1.12112	2	2.21
		42	37957	1.07146	2	1.96		42	30332	1.11983	2	2.22
		43	39222	1.10717	2	1.97		43	35856	1.32377	2	2.23
		44	30495	0.86082	2	1.98		44	26754	0.987732	2	2.24
		45	40446	1.14172	2	1.99		45	30847	1.13884	2	2.25
		46	16061	0.453374	3	2.75		46	14193	0.523992	3	3
		47	19576	0.552596	3	2.7625		47	18427	0.680307	3	3.0125
		48	18294	0.516408	3	2.775		48	24597	0.908098	3	3.025
		49	26106	0.736927	3	2.7875		49	17913	0.661331	3	3.0375
		50	14862	0.419528	3	2.8		50	16883	0.623304	3	3.05
		51	20226	0.570945	3	2.8125		51	16255	0.600119	3	3.0625
		52	20675	0.583619	3	2.825		52	15656	0.578005	3	3.075
		53	26927	0.760102	3	2.8375		53	16498	0.60909	3	3.0875
		54	19352	0.546273	3	2.85		54	22070	0.814803	3	3.1
		55	20676	0.583647	3	2.8625		55	17931	0.661995	3	3.1125
		56	17394	0.491002	3	2.875		56	15262	0.563458	3	3.125
		57	18987	0.53597	3	2.8875		57	21448	0.79184	3	3.1375
		58	37793	1.06683	3	2.9		58	14693	0.542452	3	3.15
		59	20635	0.58249	3	2.9125		59	20189	0.745359	3	3.1625
		60	20535	0.579667	3	2.925		60	15860	0.585536	3	3.175
		61	18243	0.514968	3	2.9375		61	13653	0.504056	3	3.1875
		62	23013	0.649617	3	2.95		62	20878	0.770796	3	3.2
		63	24602	0.694471	3	2.9625		63	14372	0.5306	3	3.2125
		64	19537	0.551495	3	2.975		64	15753	0.581586	3	3.225
		65	22185	0.626244	3	2.9875		65	15213	0.561649	3	3.2375
			35425.5						27086.3

## Sheet: Fig 7C DOTPLOT SOX2
		22	SOX2	Norm				9	SOX2	Norm
	Foxj1+	1	45254	1.71357	1	0.75	Foxj1+	1	132135	1.78049	1	1.01
	Trp63-Foxj-	2	52981	2.00616	1	0.763	Trp63-Foxj-	2	127816	1.72229	1	1.023
	TRP63+	3	50409	1.90877	1	0.776	TRP63+	3	106950	1.44113	1	1.036
		4	45673	1.72944	1	0.789		4	75072	1.01158	1	1.049
		5	34487	1.30587	1	0.802		5	69891	0.941764	1	1.062
		6	37516	1.42057	1	0.815		6	151941	2.04737	1	1.075
		7	40305	1.52617	1	0.828		7	81506	1.09827	1	1.088
		8	28174	1.06683	1	0.841		8	126774	1.70825	1	1.101
		9	34668	1.31272	1	0.854		9	76469	1.0304	1	1.114
		10	42422	1.60633	1	0.867		10	124029	1.67126	1	1.127
		11	45000	1.70395	1	0.88		11	127748	1.72137	1	1.14
		12	49075	1.85825	1	0.893		12	112561	1.51673	1	1.153
		13	59875	2.2672	1	0.906		13	64017	0.862613	1	1.166
		14	43992	1.66578	1	0.919		14	84534	1.13908	1	1.179
		15	38724	1.46631	1	0.932		15	64687	0.871642	1	1.192
		16	33661	1.27459	1	0.945		16	98996	1.33395	1	1.205
		17	39092	1.48024	1	0.958		17	68812	0.927225	1	1.218
		18	51911	1.96564	1	0.971		18	75440	1.01654	1	1.231
		19	39383	1.49126	1	0.984		19	88147	1.18776	1	1.244
		20	60971	2.3087	1	0.997		20	81581	1.09928	2	2
		21	36158	1.36914	2	1.75		21	88828	1.19694	2	2.01
		22	42133	1.59539	2	1.76		22	87643	1.18097	2	2.02
		23	30879	1.16925	2	1.77		23	88917	1.19813	2	2.03
		24	35695	1.35161	2	1.78		24	88678	1.19491	2	2.04
		25	31711	1.20076	2	1.79		25	74025	0.997469	2	2.05
		26	35907	1.35964	2	1.8		26	97484	1.31357	2	2.06
		27	37225	1.40955	2	1.81		27	93596	1.26118	2	2.07
		28	29605	1.12101	2	1.82		28	80373	1.08301	2	2.08
		29	36669	1.38849	2	1.83		29	74094	0.998399	2	2.09
		30	36117	1.36759	2	1.84		30	78075	1.05204	2	2.1
		31	21728	0.822744	2	1.85		31	86987	1.17213	2	2.11
		32	18523	0.701384	2	1.86		32	98374	1.32557	2	2.12
		33	19095	0.723043	2	1.87		33	85980	1.15856	2	2.13
		34	19000	0.719446	2	1.88		34	74932	1.00969	2	2.14
		35	20668	0.782606	2	1.89		35	81620	1.09981	2	2.15
		36	16321	0.618004	2	1.9		36	80103	1.07937	2	2.16
		37	15181	0.574838	2	1.91		37	91156	1.2283	2	2.17
		38	15747	0.596269	2	1.92		38	89365	1.20417	2	2.18
		39	16756	0.634476	2	1.93		39	70726	0.953016	2	2.19
		40	16726	0.63334	2	1.94		40	57565	0.775674	2	2.2
		41	14026	0.531103	2	1.95		41	68957	0.929179	2	2.21
		42	12351	0.467678	2	1.96		42	88120	1.1874	2	2.22
		43	15451	0.585061	2	1.97		43	103625	1.39632	2	2.23
		44	19398	0.734517	2	1.98		44	81075	1.09247	2	2.24
		45	18240	0.690668	2	1.99		45	77065	1.03843	2	2.25
		46	10921	0.41353	3	2.75		46	49404	0.665707	3	3
		47	11670	0.441891	3	2.7625		47	30729	0.414066	3	3.0125
		48	11922	0.451434	3	2.775		48	44783	0.60344	3	3.025
		49	12386	0.469003	3	2.7875		49	40886	0.550929	3	3.0375
		50	11190	0.423716	3	2.8		50	35573	0.479337	3	3.05
		51	12203	0.462074	3	2.8125		51	35212	0.474473	3	3.0625
		52	10966	0.415234	3	2.825		52	34952	0.47097	3	3.075
		53	12939	0.489943	3	2.8375		53	53917	0.726518	3	3.0875
		54	12221	0.462755	3	2.85		54	36659	0.493971	3	3.1
		55	10582	0.400694	3	2.8625		55	36447	0.491114	3	3.1125
		56	11758	0.445224	3	2.875		56	38683	0.521244	3	3.125
		57	12032	0.455599	3	2.8875		57	35890	0.483609	3	3.1375
		58	12522	0.474153	3	2.9		58	37561	0.506125	3	3.15
		59	11663	0.441626	3	2.9125		59	44986	0.606175	3	3.1625
		60	10836	0.410312	3	2.925		60	38722	0.52177	3	3.175
		61	10715	0.40573	3	2.9375		61	48545	0.654132	3	3.1875
		62	10796	0.408797	3	2.95		62	35427	0.47737	3	3.2
		63	10508	0.397892	3	2.9625		63	45024	0.606687	3	3.2125
		64	12736	0.482256	3	2.975		64	39164	0.527725	3	3.225
		65	11149	0.422163	3	2.9875		65	34802	0.468948	3	3.2375
			26409.2						74212.8

## Sheet: Fig 7D Counting FOXJ1
# is per 1024x1024px or 387.5x387.5um. Set on treshold and analyze particles bigger than 20
Donor 2 - Foxj1			Cherry+	Cherry+Foxj1+	Total FOXj1 /screen				Cherry+	Cherry+Foxj1+	Total FOXj1 /screen					Cherry+	Cherry+Foxj1+	Total FOXj1 /screen
	shSox21-C	1	173	45	144		Scr	1	81	13	84			shSox2-C	1	153	32	111
		2	170	35	106			2	92	12	66				2	151	41	149
		3	111	53	232			3	64	6	82				3	115	41	229
		Total	454	133	160.667			Total	237	31	77.3333				Total	419	114	163
		%	29.2952	Average by 100um	41.4624			%	13.0802		19.957				%	27.2076		42.0645
	shSox21-B	1	81	6	90									shSox2-B	1	99	22	135
		2	53	9	125										2	54	12	141
		3	95	15	150		Ctrl	1	0	0	53				3	94	23	234
		Total	229	30	121.667			2	0	0	111				Total	247	57	170
		%	13.1004	Average by 100um	31.3978			3	0	0	99				%	23.0769		43.871
	shSox21-A	1	141	13	42			Total	0	0	87.6667			shSox2-A	1	98	16	43
		2	52	0	0	* No foxj1, could see cilia on top of the red cells				Average by 100um	22.6237				2	54	11	82
		3	74	14	52	*Weak staining Foxj1									3	89	20	81
		Total	215	27	47										Total	241	47	68.6667
		%	12.5581	Average by 100um	12.129										%	19.5021		17.7204
Donor 4 - Foxj1			Cherry+	Cherry+Foxj1+	Total FOXj1 /screen				Cherry+	Cherry+Foxj1+	Total FOXj1 /screen					Cherry+	Cherry+Foxj1+	Total FOXj1 /screen
	shSox21-C	1	75	16	154		Scr	1	37	11	76			shSox2-C	1	67	15	200
		2	43	25	471			2	40	3	65				2	58	19	281
		3	52	16	223			3	32	3	31				3	71	17	231
		Total	170	57	282.667			Total	109	17	57.3333				Total	196	51	237.333
		%	33.5294	Average by 100um	72.9462			%	15.5963	Average by 100um	14.7957				%	26.0204	Average by 100um	61.2473
	shSox21-B	1	20	9	259									shSox2-B	1	53	8	219
		2	29	4	69		Ctrl	1	0	0	47				2	61	17	265
		3	27	7	183			2	0	0	120				3	71	14	161
		Total	76	20	170.333			3	0	0	157				Total	185	39	215
		%	26.3158	Average by 100um	43.957			Total	0	0	108				%	21.0811	Average by 100um	55.4839
	shSox21-A	1	64	14	112					Average by 100um	27.871			shSox2-A	1	18	3	204
		2	44	10	139										2	22	1	162
		3	42	3	89										3	18	6	250
		Total	150	27	113.333										Total	58	10	205.333
		%	18	Average by 100um	29.2473										%	17.2414	Average by 100um	52.9892
Donor 3 - Foxj1			Cherry+	Cherry+Foxj1+	Total FOXj1 /screen				Cherry+	Cherry+Foxj1+	Total FOXj1 /screen					Cherry+	Cherry+Foxj1+	Total FOXj1 /screen
	shSox21-C	1	32	8	45		Scr	1	46	8	92			shSox2-C	1	30	9	151
		2	23	6	54			2	35	5	59				2	30	5	39
		3	25	10	97			3	45	5	45				3	36	1	64
		Total	80	24	65.3333			Total	126	18	65.3333				Total	96	15	84.6667
		%	30	Average by 100um	16.8602			%	14.2857	Average by 100um	16.8602				%	15.625	Average by 100um	21.8495
	shSox21-B	1	17	0	87									shSox2-B	1	36	5	81
		2	13	2	85		Ctrl	1	0	0	101				2	21	2	67
		3	13	2	204			2	0	0	45				3	29	6	87
		Total	43	4	125.333			3	0	0	88				Total	86	13	78.3333
		%	9.30233	Average by 100um	32.3441			Total	0	0	78				%	15.1163	Average by 100um	20.2151
	shSox21-A	1	38	10	147					Average by 100um	20.129			shSox2-A	1	12	4	80
		2	32	5	153										2	6	1	96
		3	26	4	87										3	6	1	42
		Total	96	19	129										Total	24	6	72.6667
		%	19.7917	Average by 100um	33.2903										%	25	Average by 100um	18.7527
Donor 1 - Foxj1			Cherry+	Cherry+Foxj1+	Total FOXj1 /screen				Cherry+	Cherry+Foxj1+	Total FOXj1 /screen					Cherry+	Cherry+Foxj1+	Total FOXj1 /screen
	shSox21-C	1	52	20	380		Scr	1	38	5	142			shSox2-C	1	40	13	292
		2	42	7	224			2	34	7	91				2	76	13	144
		3	58	22	371			3	48	11	88				3	51	7	199
		Total	152	49	325			Total	120	23	107				Total	167	33	211.667
		%	32.2368	Average by 100um	83.871			%	19.1667	Average by 100um	27.6129				%	19.7605	Average by 100um	54.6237
	shSox21-B	1	29	5	159									shSox2-B	1	71	12	325
		2	47	6	201		Ctrl	1	0	0	313				2	57	21	343
		3	39	1	104			2	0	0	152				3	46	8	142
		Total	115	12	154.667			3	0	0	116				Total	174	41	270
		%	10.4348	Average by 100um	39.914			Total	0	0	193.667				%	23.5632	Average by 100um	69.6774
	shSox21-A	1	35	4	237					Average by 100um	49.9785			shSox2-A	1	50	10	182
		2	16	3	125										2	58	17	171
		3	42	4	160										3	51	15	119
		Total	93	11	174										Total	159	42	157.333
		%	11.828	Average by 100um	44.9032										%	26.4151	Average by 100um	40.6022

## Sheet: Fig 7E Sup Fig 6G MUC5B TUBIV
Donor 3 - TUBIV			Cherry+	Cherry+TUBIV+	Total TubIV+ /screen				Cherry+	Cherry+TUBIV+	Total TubIV+ /screen					Cherry+	Cherry+TUBIV+	Total TubIV+ /screen
	shSox21-C	1	14392.6	443.777	6129.54		Scr	1	5461.22	1008.56	31274.9			shSox2-C	1	11191.1	1502.74	7231.75
		2	11043.7	1509.9	10980.2			2	14436.3	1909.57	17195.3				2	3241.05	41.242	2943.77
		3	12174.3	3792.8	9765.82			3	5568.05	331.222	10919.6				3	9767.11	4528.42	48604.6
		Total	37610.7	5746.48	26875.5			Total	25465.6	3249.35	59389.8				Total	24199.3	6072.4	58780.1
		% Cherry+TubIV /totalCherry	15.2789	Gemiddelde	8958.51			% Cherry+TubIV /totalCherry	12.7598	Gemiddelde	19796.6				% Cherry+TubIV /totalCherry	25.0934	Gemiddelde	19593.4
		% Cherry+TubIV /totalTUB	21.3818	% of TubIV / 387,5 um2Area	5.96612			% Cherry+TubIV /totalTUB	5.47123	% of TubIV / 387,5 um2Area	13.184				% Cherry+TubIV /totalTUB	10.3307	% of TubIV / 387,5 um2Area	13.0486
	shSox21-B	1	11086.4	541.726	9373.45									shSox2-B	1	5945.53	1157.49	14692.6
		2	3632.99	764.259	27599.8		Ctrl	1			22718.1				2	7433.66	824.69	11808.6
		3	3903.21	364.874	17437.6			2			11630.9				3	5065.13	731.61	15903.5
		Total	18622.6	1670.86	54410.9			3			4149.23				Total	18444.3	2713.79	42404.7
		% Cherry+TubIV /totalCherry	8.97221	Gemiddelde	18137			Total	0	0	38498.2				% Cherry+TubIV /totalCherry	14.7134	Gemiddelde	14134.9
		% Cherry+TubIV /totalTUB	3.07082	% of TubIV / 387,5 um2Area	12.0787					Gemiddelde	12832.7				% Cherry+TubIV /totalTUB	6.39973	% of TubIV / 387,5 um2Area	9.41346
	shSox21-A	1	6100.04	566.786	16482.3					% of TubIV / 387,5 um2Area	8.54626			shSox2-A	1	2480.51	265.063	15612.5
		2	4384.79	1415.25	34705.1										2	5867.05	296.854	10855
		3	12797.8	1643.51	12155										3	3498.95	48.402	3600.62
		Total	23282.6	3625.54	63342.4										Total	11846.5	610.319	30068.2
		% Cherry+TubIV /totalCherry	15.5719	Gemiddelde	21114.1										% Cherry+TubIV /totalCherry	5.15188	Gemiddelde	10022.7
		% Cherry+TubIV /totalTUB	5.72372	% of TubIV / 387,5 um2Area	14.0615										% Cherry+TubIV /totalTUB	2.02978	% of TubIV / 387,5 um2Area	6.67486
Donor 4 - TUBIV			Cherry+	Cherry+TUBIV+	Total TubIV+ /screen				Cherry+	Cherry+TUBIV+	Total TubIV+ /screen					Cherry+	Cherry+TUBIV+	Total TubIV+ /screen
	shSox21-C	1	9124.71	3047.44	50345.7		Scr	1	7719.63	936.959	17155.1			shSox2-C	1	8861.23	3706.02	35650.5
		2	14234	2469.92	30386.6			2	2642.76	1036.77	27364.7				2	5508.62	1599.69	37546.2
		3	16650.6	5544.28	45328.1			3	4427.03	16.182	6626.87				3	10510.9	3953.47	34483
		Total	40009.3	11061.6	126061			Total	14789.4	1989.91	51146.7				Total	24880.7	9259.18	107680
		% Cherry+TubIV /totalCherry	27.6477	Gemiddelde	42020.2			% Cherry+TubIV /totalCherry	13.455	Gemiddelde	17048.9				% Cherry+TubIV /totalCherry	37.2142	Gemiddelde	35893.3
		% Cherry+TubIV /totalTUB	8.77486	% of TubIV / 387,5 um2Area	27.9843			% Cherry+TubIV /totalTUB	3.8906	% of TubIV / 387,5 um2Area	11.3541				% Cherry+TubIV /totalTUB	8.59881	% of TubIV / 387,5 um2Area	23.9039
	shSox21-B	1	2731.97	585.545	11023									shSox2-B	1	12682.4	2014.97	17256.2
		2	4984.37	455.377	9247.29		Ctrl	1			11088.1				2	13586	4874.82	32425
		3	5994.5	315.04	7127.79			2			11133				3	17858.3	3485.78	23631.7
		Total	13710.8	1355.96	27398.1			3			17397.7				Total	44126.7	10375.6	73312.9
		% Cherry+TubIV /totalCherry	9.88971	Gemiddelde	9132.69			Total	0	0	39618.8				% Cherry+TubIV /totalCherry	23.5131	Gemiddelde	24437.6
		% Cherry+TubIV /totalTUB	4.94912	% of TubIV / 387,5 um2Area	6.08212					Gemiddelde	13206.3				% Cherry+TubIV /totalTUB	14.1524	% of TubIV / 387,5 um2Area	16.2748
	shSox21-A	1	3443.68	993.093	29044.1					% of TubIV / 387,5 um2Area	8.79501			shSox2-A	1	4029.22	523.54	10580.8
		2	2673.12	1029.04	61397.6										2	1509.62	182.723	14832.7
		3	7223.59	966.601	30574.7										3	5790.44	885.836	17231.6
		Total	13340.4	2988.73	121016										Total	11329.3	1592.1	42645
		% Cherry+TubIV /totalCherry	22.4036	Gemiddelde	40338.8										% Cherry+TubIV /totalCherry	14.053	Gemiddelde	14215
		% Cherry+TubIV /totalTUB	2.46969	% of TubIV / 387,5 um2Area	26.8646										% Cherry+TubIV /totalTUB	3.73338	% of TubIV / 387,5 um2Area	9.46681
Donor 2 - TUBIV			Cherry+	Cherry+TUBIV+	Total TubIV+ /screen				Cherry+	Cherry+TUBIV+	Total TubIV+ /screen					Cherry+	Cherry+TUBIV+	Total TubIV+ /screen
	shSox21-C	1	16360.8	1979.46	10789.4		Scr	1	16655.6	2642.04	15577.7			shSox2-C	1	22045.1	1856.59	7540.63
		2	16151.1	2932.31	20774.5			2	15799.4	2892.36	17401.5				2	17014.5	3861.97	20044
		3	14318	5836.98	35461.5			3	10882.2	1654.25	11331.6				3	16004.9	4134.76	12403.1
		Total	46829.9	10748.7	67025.4			Total	43337.2	7188.65	44310.9				Total	55064.5	9853.32	39987.8
		% Cherry+TubIV /totalCherry	22.9528	Gemiddelde	22341.8			% Cherry+TubIV /totalCherry	16.5877	Gemiddelde	14770.3				% Cherry+TubIV /totalCherry	17.8941	Gemiddelde	13329.3
		% Cherry+TubIV /totalTUB	16.0368	% of TubIV / 387,5 um2Area	14.879			% Cherry+TubIV /totalTUB	16.2232	% of TubIV / 387,5 um2Area	9.83661				% Cherry+TubIV /totalTUB	24.6408	% of TubIV / 387,5 um2Area	8.87693
	shSox21-B	1	11156.4	3093.98	16009.8									shSox2-B	1	23095.3	4098.68	20354.8
		2	10920.6	3069.07	21029.2		Ctrl	1			7851.38				2	13826.3	1509.9	7003.78
		3	11391.1	2430.54	18497.7			2			6855.42				3	14946.8	3402.44	18275.6
		Total	33468.2	8593.58	55536.7			3			11238.8				Total	51868.4	9011.01	45634.2
		% Cherry+TubIV /totalCherry	25.6769	Gemiddelde	18512.2			Total	0	0	25945.6				% Cherry+TubIV /totalCherry	17.3728	Gemiddelde	15211.4
		% Cherry+TubIV /totalTUB	15.4737	% of TubIV / 387,5 um2Area	12.3287					Gemiddelde	8648.53				% Cherry+TubIV /totalTUB	19.7462	% of TubIV / 387,5 um2Area	10.1304
	shSox21-A	1	21301.7	1886.52	9381.9					% of TubIV / 387,5 um2Area	5.75968			shSox2-A	1	13502.6	3624.4	21646.7
		2	21981.4	2331.73	15933.2										2	11396.4	2493.26	25589.4
		3	10537.1	2299.51	19495.6										3	8112.15	2669.11	35387.9
		Total	53820.2	6517.76	44810.6										Total	33011.2	8786.76	82624.1
		% Cherry+TubIV /totalCherry	12.1102	Gemiddelde	14936.9										% Cherry+TubIV /totalCherry	26.6175	Gemiddelde	27541.4
		% Cherry+TubIV /totalTUB	14.5451	% of TubIV / 387,5 um2Area	9.94755										% Cherry+TubIV /totalTUB	10.6346	% of TubIV / 387,5 um2Area	18.3418
Donor 1 - TUBIV			Cherry+	Cherry+TUBIV+	Total TubIV+ /screen				Cherry+	Cherry+TUBIV+	Total TubIV+ /screen					Cherry+	Cherry+TUBIV+	Total TubIV+ /screen
	shSox21-C	1	8450.1	1640.93	24204.5		Scr	1	7762.59	1447.75	46579.3			shSox2-C	1	12017.6	1078.01	23052.8
		2	6016.56	298	10512.6			2	8729.77	993.523	16505.4				2	5614.16	2395.02	58657.6
		3	8223.99	2591.78	37809.1			3	8409.43	800.918	30670.9				3	5479.98	1960.41	42360.3
		Total	22690.6	4530.71	72526.3			Total	24901.8	3242.2	93755.6				Total	23111.8	5433.44	124071
		% Cherry+TubIV /totalCherry	19.9673	Gemiddelde	24175.4			% Cherry+TubIV /totalCherry	13.0199	Gemiddelde	31251.9				% Cherry+TubIV /totalCherry	23.5094	Gemiddelde	41356.9
		% Cherry+TubIV /totalTUB	6.24699	% of TubIV / 387,5 um2Area	16.1002			% Cherry+TubIV /totalTUB	3.45814	% of TubIV / 387,5 um2Area	20.8129				% Cherry+TubIV /totalTUB	4.37931	% of TubIV / 387,5 um2Area	27.5426
	shSox21-B	1	3410.89	1152.19	42523.7									shSox2-B	1	9782.86	1984.61	56271.2
		2	3012.79	903.736	53667.8		Ctrl	1			31192.4				2	8180.31	1954.54	40139
		3	4751.38	896.576	16316.5			2			28867.9				3	8637.69	2532.07	53350.9
		Total	11175.1	2952.5	112508			3			34989.2				Total	26600.9	6471.22	149761
		% Cherry+TubIV /totalCherry	26.4205	Gemiddelde	37502.7			Total	0	0	95049.5				% Cherry+TubIV /totalCherry	24.3271	Gemiddelde	49920.4
		% Cherry+TubIV /totalTUB	2.62426	% of TubIV / 387,5 um2Area	24.9758					Gemiddelde	31683.2				% Cherry+TubIV /totalTUB	4.32102	% of TubIV / 387,5 um2Area	33.2456
	shSox21-A	1	9148.49	417.142	21350.9					% of TubIV / 387,5 um2Area	21.1001			shSox2-A	1	3697.72	790.322	16094.7
		2	13121.4	953.427	28470.6										2	11953.6	822.112	18727.6
		3	8772.58	729.318	17568.2										3	4528.42	1172.95	35346.5
		Total	31042.5	2099.89	67389.7										Total	20179.8	2785.39	70168.8
		% Cherry+TubIV /totalCherry	6.76455	Gemiddelde	22463.2										% Cherry+TubIV /totalCherry	13.8029	Gemiddelde	23389.6
				% of TubIV / 387,5 um2Area	14.9599										% Cherry+TubIV /totalTUB	3.96955	% of TubIV / 387,5 um2Area	15.5768
Donor 3 - MUC5B			Cherry+	Cherry+MUC+	Total MUC+/screen				Cherry+	Cherry+MUC+	Total MUC+/screen					Cherry+	Cherry+MUC+	Total MUC+/screen
	shSox21-C	1	7473.76	396.664	8563.23		Scr	1	6247.39	366.449	8696.69			shSox2-C	1	6730.41	450.794	17291.4
		2	11043.7	1100.49	14008.6			2	10412.2	512.657	14779.5				2	4797.2	46.97	9654.84
		3	15865.4	251.216	15015.6			3	4731.05	765.548	31522.1				3	15718.5	361.008	8933.11
		Total	34382.9	1748.37	37587.4			Total	21390.7	1644.65	54998.3				Total	27246.1	858.772	35879.4
		% Cherry+MUC5B /totalCherry	5.085	Gemiddelde	12529.1			% Cherry+MUC5B /totalCherry	7.68865	Gemiddelde	18332.8				% Cherry+MUC5B /totalCherry	3.15191	Gemiddelde	11959.8
		% Cherry+MUC5B /totalMUC	4.65149	% of MUC5B / 387,5 um2Area	8.34407			% Cherry+MUC5B /totalMUC	2.99037	% of MUC5B / 387,5 um2Area	12.2091				% Cherry+MUC5B /totalMUC	2.3935	% of MUC5B / 387,5 um2Area	7.9649
	shSox21-B	1	2529.49	85.061	11672.8									shSox2-B	1	9169.25	1112.66
		2	3843.06	412.56	23893.7		Ctrl	1			17186.7				2	4822.41	327.499	17481.4
		3	6283.91	481.153	16921.5			2			16206.4				3	6548.97	172.556	7673.81
		Total	12656.5	978.774	52488			3			22503.2				Total	20540.6	1612.72	25155.3
		% Cherry+MUC5B /totalCherry	7.73339	Gemiddelde	17496			Total	0	0	55896.3				% Cherry+MUC5B /totalCherry	7.85137	Gemiddelde	12577.6
		% Cherry+MUC5B /totalMUC	1.86476	% of MUC5B / 387,5 um2Area	11.6519					Gemiddelde	18632.1				% Cherry+MUC5B /totalMUC	6.41107	% of MUC5B / 387,5 um2Area	8.37636
	shSox21-A	1	7670.37	582.825	18622					% of MUC5B / 387,5 um2Area	12.4085			shSox2-A	1	3428.78	146.923	8841.89
		2	3583.73	236.996	16421.3										2	5442.18	365.304	21429.2
		3	4576.96	139.62	20495										3	3498.95	113.128	11116.9
		Total	15831.1	959.441	55538.3										Total	12369.9	625.355	41388
		% Cherry+MUC5B /totalCherry	6.0605	Gemiddelde	18512.8										% Cherry+MUC5B /totalCherry	5.05545	Gemiddelde	13796
		% Cherry+MUC5B /totalMUC	1.72753	% of MUC5B / 387,5 um2Area	12.329										% Cherry+MUC5B /totalMUC	1.51096	% of MUC5B / 387,5 um2Area	9.18776
Donor 2 - MUC5B			Cherry+	Cherry+MUC+	Total MUC+/screen				Cherry+	Cherry+MUC+	Total MUC+/screen					Cherry+	Cherry+MUC+	Total MUC+/screen
	shSox21-C	1	16360.8	1616.73	15807		Scr	1	16655.6	2423.23	25093.1			shSox2-C	1	22045.1	1110.95	16970.9
		2	16151.1	1558.45	19422.4			2	15799.4	2152.3	24821.3				2	17014.5	1814.92	18164.1
		3	14318	1716.97	26590			3	10882.2	1634.49	21495.2				3	16004.9	1354.82	15539.5
		Total	46829.9	4892.15	61819.4			Total	43337.2	6210.02	71409.6				Total	55064.5	4280.68	50674.5
		% Cherry+MUC5B /totalCherry	10.4466	Gemiddelde	20606.5			% Cherry+MUC5B /totalCherry	14.3295	Gemiddelde	23803.2				% Cherry+MUC5B /totalCherry	7.77395	Gemiddelde	16891.5
		% Cherry+MUC5B /totalMUC	7.91362	% of MUC5B / 387,5 um2Area	13.7233			% Cherry+MUC5B /totalMUC	8.69633	% of MUC5B / 387,5 um2Area	15.8523				% Cherry+MUC5B /totalMUC	8.44741	% of MUC5B / 387,5 um2Area	11.2493
	shSox21-B	1	11156.4	648.41	13640									shSox2-B	1	23095.3	1252.86	11027.1
		2	10920.6	1900.27	27946.9		Ctrl	1			12816.8				2	13826.3	697.528	10729.6
		3	11391.1	746.646	18364.8			2			22836.8				3	14946.8	731.037	13036.9
		Total	33468.2	3295.32	59951.7			3			6131.11				Total	51868.4	2681.42	34793.6
		% Cherry+MUC5B /totalCherry	9.84614	Gemiddelde	19983.9			Total	0	0	41784.8				% Cherry+MUC5B /totalCherry	5.16967	Gemiddelde	11597.9
		% Cherry+MUC5B /totalMUC	5.49662	% of MUC5B / 387,5 um2Area	13.3087					Gemiddelde	13928.3				% Cherry+MUC5B /totalMUC	7.70665	% of MUC5B / 387,5 um2Area	7.72387
	shSox21-A	1	21301.7	1444.03	18429.6					% of MUC5B / 387,5 um2Area	9.27585			shSox2-A	1	13502.6	761.825	14161.4
		2	21981.4	1369.42	17287.4										2	11396.4	1076.44	17396.4
		3	10537.1	721.729	15785.4										3	8112.15	349.265	8529
		Total	53820.2	3535.18	51502.4										Total	33011.2	2187.53	40086.7
		% Cherry+MUC5B /totalCherry	6.5685	Gemiddelde	17167.5										% Cherry+MUC5B /totalCherry	6.62661	Gemiddelde	13362.2
		% Cherry+MUC5B /totalMUC	6.86412	% of MUC5B / 387,5 um2Area	11.4331										% Cherry+MUC5B /totalMUC	5.45698	% of MUC5B / 387,5 um2Area	8.89889
Donor 1 - MUC5B			Cherry+	Cherry+MUC+	Total MUC+/screen				Cherry+	Cherry+MUC+	Total MUC+/screen					Cherry+	Cherry+MUC+	Total MUC+/screen
	shSox21-C	1	8450.1	526.404	15650.1		Scr	1	7762.59	2577.03	4910.76			shSox2-C	1	12017.6	344.253	7116.9
		2	6016.56	481.153	8395.4			2	8729.77	1079.16	22898.1				2	5614.16	266.352	6056.94
		3	8223.99	810.943	8118.88			3	8409.43	261.054	38082.4				3	5479.98	31.524	315.327
		Total	22690.6	1818.5	32164.3			Total	24901.8	3917.24	65891.3				Total	23111.8	642.129	13489.2
		% Cherry+MUC5B /totalCherry	8.01432	Gemiddelde	10721.4			% Cherry+MUC5B /totalCherry	15.7308	Gemiddelde	21963.8				% Cherry+MUC5B /totalCherry	2.77836	Gemiddelde	4496.39
		% Cherry+MUC5B /totalMUC	5.65378	% of MUC5B / 387,5 um2Area	7.14019			% Cherry+MUC5B /totalMUC	5.94501	% of MUC5B / 387,5 um2Area	14.6273				% Cherry+MUC5B /totalMUC	4.76033	% of MUC5B / 387,5 um2Area	2.99447
	shSox21-B	1	3410.89	259.908	9773.98									shSox2-B	1	9782.86	128.307	261.34
		2	3012.79	202.199	4702.69		Ctrl	1			16400.3				2	8180.31	135.754	1375.29
		3	4751.38	41.098	2947.92			2			4796.35				3	8637.69	331.652	3374.66
		Total	11175.1	503.205	17424.6			3			6689.45				Total	26600.9	595.713	5011.29
		% Cherry+MUC5B /totalCherry	4.50293	Gemiddelde	5808.2			Total	0	0	27886.1				% Cherry+MUC5B /totalCherry	2.23945	Gemiddelde	1670.43
		% Cherry+MUC5B /totalMUC	2.8879	% of MUC5B / 387,5 um2Area	3.8681					Gemiddelde	9295.36				% Cherry+MUC5B /totalMUC	11.8874	% of MUC5B / 387,5 um2Area	1.11246
	shSox21-A	1	9148.49	511.941	7088.41					% of MUC5B / 387,5 um2Area	6.19046			shSox2-A	1	3697.72	0.859	183.583
		2	13121.4	77.328	1275.63										2	11953.6	363.728	6808.74
		3	8772.58	204.06	4418.58										3	4528.42	36.516	928.653
		Total	31042.5	793.329	12782.6										Total	20179.8	401.103	7920.97
		% Cherry+MUC5B /totalCherry	2.55562	Gemiddelde	4260.87										% Cherry+MUC5B /totalCherry	1.98765	Gemiddelde	2640.32
		% Cherry+MUC5B /totalMUC	6.20631	% of MUC5B / 387,5 um2Area	2.83763										% Cherry+MUC5B /totalMUC	5.06381	% of MUC5B / 387,5 um2Area	1.75838
			Donor 1 =26 Donor 2 = 29 Donor 3= 28 Donor 4 = 27 (Exp4)

## Sheet: Sup. Fig 6D DOTPLOT FOXJ1
					Norm						Norm
		Donor 22	S2	S21	S2	S21		Donor 5	S2	S21	S2	S21
	FOXJ1	1	29795	21395	1.29265	0.825423		1	81773	26921	1.55018	0.871455
		2	30226	25319	1.31134	0.976812		2	83072	28178	1.57481	0.912145
		3	22837	23241	0.990776	0.896642		3	87557	28180	1.65983	0.91221
		4	27141	21560	1.1775	0.831789		4	101892	28471	1.93158	0.92163
		5	22518	20930	0.976936	0.807484		5	96185	22791	1.82339	0.737764
		6	22755	19717	0.987218	0.760686		6	85633	28734	1.62335	0.930143
		7	22780	22383	0.988303	0.863541		7	112964	31867	2.14147	1.03156
		8	28218	24612	1.22423	0.949536		8	81542	26868	1.5458	0.869739
		9	23111	21831	1.00266	0.842244		9	73056	28525	1.38493	0.923378
		10	30306	23145	1.31482	0.892939		10	83199	32345	1.57721	1.04703
		11	27311	25256	1.18488	0.974382		11	89184	30761	1.69067	0.995759
		12	30039	25254	1.30323	0.974304		12	66772	30490	1.2658	0.986987
		13	32208	21935	1.39733	0.846257		13	95018	27251	1.80127	0.882137
		14	35300	25539	1.53148	0.9853		14	95301	22828	1.80663	0.738961
		15	21953	18634	0.952424	0.718903		15	95301	22828	1.80663	0.738961
		16	18446	31027	0.800274	1.19703		16	82321	27538	1.56057	0.891428
		17	24293	19387	1.05394	0.747954		17	87684	24466	1.66224	0.791985
		18	33335	25730	1.44623	0.992669		18	80427	27780	1.52466	0.899262
		19	33021	22604	1.43261	0.872067		19	78794	30931	1.49371	1.00126
		20	27435	25710	1.19026	0.991897		20	56330	30498	1.06785	0.987246
		21	30845	26835	1.3382	1.0353		21	86243	21131	1.63492	0.684028
		22	17045	36286	0.739492	1.39992		22	96277	22492	1.82513	0.728085
		23	31874	25648	1.38284	0.989505		23	84441	29195	1.60076	0.945066
		24	34217	22372	1.48449	0.863116		24	88926	27604	1.68578	0.893564
		25	16899	30382	0.733157	1.17214		25	55826	24479	1.0583	0.792406
		26	31242	23183	1.35542	0.894405		26	84595	28436	1.60368	0.920497
		27	30186	18443	1.30961	0.711535		27
		28	33366	23373	1.44757	0.901735		28	66502	23483	1.26069	0.760164
		29	36899	32656	1.60085	1.25988		29
		30	32746	24269	1.42067	0.936303		30	76689	26816	1.4538	0.868056
		31	28524	27160	1.2375	1.04784		31	50326	23401	0.954036	0.75751
		32	25543	39443	1.10817	1.52172		32	72739	23995	1.37892	0.776738
		33	26303	34832	1.14115	1.34383		33	64295	24360	1.21885	0.788553
		34	28306	32821	1.22805	1.26624		34	56380	24431	1.0688	0.790852
		35	31526	38383	1.36774	1.48082		35	61384	30932	1.16366	1.00129
		36	24246	32750	1.0519	1.2635		36	61237	26706	1.16088	0.864495
		37	27169	36000	1.17872	1.38889		37	67854	38899	1.28632	1.25919
		38	28090	34323	1.21868	1.32419		38	62437	35222	1.18363	1.14017
		39	29197	35270	1.2667	1.36072		39	57715	36461	1.09411	1.18027
		40	26415	32431	1.14601	1.25119		40	58996	31012	1.11839	1.00388
		41	24207	33329	1.05021	1.28584		41	55912	34963	1.05993	1.13178
		42	27309	34324	1.18479	1.32423		42	67613	34868	1.28175	1.12871
		43	25513	30890	1.10687	1.19174		43	57891	37820	1.09745	1.22426
		44	22763	30511	0.987565	1.17712		44	48410	37991	0.917714	1.2298
		45	22378	28526	0.970862	1.10054		45	54425	46262	1.03174	1.49754
		46	21827	29120	0.946957	1.12346		46	60630	37201	1.14937	1.20423
		47	23820	31340	1.03342	1.2091		47	59380	45094	1.12567	1.45973
		48	30011	31065	1.30202	1.19849		48	54806	38355	1.03896	1.24158
		49	26459	33326	1.14791	1.28572		49	51325	36256	0.972974	1.17364
		50	26665	29191	1.15685	1.12619		50	64872	37633	1.22979	1.21821
		51	18558	29549	0.805133	1.14001		51	53776	39344	1.01944	1.2736
		52	20654	30551	0.896067	1.17866		52	50082	37104	0.94941	1.20109
		53	21538	29942	0.934419	1.15517		53	56682	38390	1.07453	1.24272
		54	21598	29500	0.937022	1.13812		54	53778	38825	1.01948	1.2568
		55	17559	28256	0.761791	1.09012		55	54339	38580	1.03011	1.24887
		56	18536	26052	0.804178	1.00509		56	38374	30716	0.72746	0.994302
		57	20892	29820	0.906392	1.15046		57	53857	40656	1.02097	1.31607
		58	17405	27873	0.75511	1.07535		58	54927	40771	1.04126	1.31979
		59	19805	26846	0.859233	1.03572		59	59677	32361	1.1313	1.04755
		60	19029	29021	0.825567	1.11964		60	64939	38704	1.23106	1.25288
		61	19362	28032	0.840014	1.08148		61	58473	40886	1.10848	1.32351
		62	19259	29357	0.835545	1.1326		62	34023	32131	0.644978	1.04011
		63	17059	25567	0.740099	0.98638		63	24663	33457	0.467539	1.08303
		64	20856	25807	0.904831	0.995639		64	28882	30218	0.547519	0.978182
		65	18604	24230	0.807128	0.934798		65	26590	34299	0.50407	1.11029
		66	18241	23482	0.79138	0.90594		66	26309	29801	0.498743	0.964683
		67	18531	24679	0.803961	0.952121		67	31628	32011	0.599576	1.03622
		68	17706	24008	0.768169	0.926233		68	31324	31032	0.593813	1.00453
		69	17730	24095	0.76921	0.92959		69	32051	33014	0.607594	1.06869
		70	18181	22474	0.788777	0.867051		70	22004	29585	0.417132	0.957691
		71	16574	22571	0.719057	0.870794		71	26449	31731	0.501397	1.02716
		72	15339	23059	0.665477	0.889621		72	32026	28267	0.607121	0.915026
		73	15784	20926	0.684784	0.807329		73	32714	29584	0.620163	0.957659
		74	15751	20195	0.683352	0.779127		74	19989	30084	0.378934	0.973844
		75	15544	21789	0.674371	0.840624		75	35497	36658	0.672921	1.18665
		76	18725	23192	0.812378	0.894752		76	35976	28655	0.682001	0.927586
		77	18405	24235	0.798495	0.934991		77	36269	30411	0.687556	0.984429
		78	19641	26245	0.852118	1.01254		78	32664	28571	0.619215	0.924867
		79	18092	24046	0.784915	0.9277		79	25812	26489	0.489321	0.857471
		80	22682	24465	0.984051	0.943865		80	39432	33432	0.747517	1.08222
		81	15685	23056	0.680488	0.889505		81	34672	31779	0.657281	1.02871
		82	19061	19147	0.826955	0.738695		82	29664	28524	0.562344	0.923346
		83	18429	21102	0.799536	0.814119		83	31788	27392	0.602609	0.886702
		84	18185	18546	0.78895	0.715508		84	32895	35352	0.623594	1.14437
		85	18186	20952	0.788994	0.808332		85	33589	33460	0.636751	1.08313
		86	19237	21289	0.834591	0.821334		86	24677	29377	0.467805	0.950958
		87	17816	21971	0.772941	0.847646		87	24903	27010	0.472089	0.874336
		88	18062	20092	0.783614	0.775153		88	32817	29703	0.622116	0.961511
		89	19237	21289	0.834591	0.821334		89	31989	28559	0.606419	0.924479
		90	18602	22626	0.807042	0.872916		90	34971	27836	0.662949	0.901074
		91	17760	19375	0.770512	0.747491		91	30627	29359	0.5806	0.950375
		92	19965	19785	0.866175	0.763309		92	27937	30380	0.529605	0.983426
		93	17898	19288	0.776499	0.744135		93	27195	33995	0.515539	1.10045
		94	18800	20582	0.815632	0.794058		94	44637	32183	0.846189	1.04179
		95	18340	21544	0.795675	0.831172		95	29135	27702	0.552316	0.896737
		96	19044	31642	0.826218	1.22075		96	32250	24650	0.611367	0.797941
		97	19248	18402	0.835068	0.709953		97	30495	22453	0.578097	0.726822
		Average	23049.6	25920	1	1		98	27342	24435	0.518325	0.790981
		Ave all	36483	30165.2	Total	Of FOxj1		99	27671	18371	0.524562	0.594685
49916.5	34410.3		Count	S2>1 S21>1	19	3		100	32798	30874	0.621755	0.999417
23049.6	25920			S2>1 S21<1	20	20		101	28216	23581	0.534894	0.763337
				S2<1 S21>1	20	3			52750.6	30892
				S2<1 S21<1	38	5					Total	Of FOxj1
									Count	S2>1 S21>1	25	4
			Percentage	S2>1 S21>1	19.5876	9.67742				S2>1 S21<1	29	28
				S2>1 S21<1	20.6186	64.5161				S2<1 S21>1	17	0
				S2<1 S21>1	20.6186	9.67742				S2<1 S21<1	28	1
				S2<1 S21<1	39.1753	16.129
									Percentage	S2>1 S21>1	25.2525	12.1212
				SOM	100	100				S2>1 S21<1	29.2929	84.8485
										S2<1 S21>1	17.1717	0
										S2<1 S21<1	28.2828	3.0303
				64
										SOM	100	100
			Total		S2>1 S21>1	7	10.9375
					S2>1 S21<1	48	75
					S2<1 S21>1	3	4.6875
					S2<1 S21<1	6	9.375
						0

## Sheet: Sup. Fig 6D DOTPLOT TRP63
					Norm to ave							Norm to ave
		Donor 22	S2	S21	S2	S21			Donor5	S2	S21	S2	S21
	TRP63	1	26273	35174	0.744733	1.00507		TRP63	1	23454	20175	0.5036	0.644027
		2	28810	27730	0.816646	0.792366			2	21536	19195	0.462417	0.612743
		3	28087	37788	0.796152	1.07977			3	28509	23935	0.61214	0.764054
		4	22380	28993	0.634382	0.828456			4	29293	22886	0.628974	0.730567
		5	19233	25351	0.545177	0.724388			5	32321	26821	0.693991	0.856181
		6	21613	23971	0.612641	0.684956			6	24668	26327	0.529667	0.840411
		7	23030	22757	0.652807	0.650266			7	27036	25483	0.580512	0.813469
		8	23789	33472	0.674321	0.95644			8	29431	26336	0.631937	0.840698
		9	22555	24106	0.639342	0.688813			9	25749	23116	0.552878	0.73791
		10	25320	32055	0.717719	0.91595			10	22167	20625	0.475966	0.658392
		11	24052	28313	0.681776	0.809025			11	23668	21346	0.508195	0.681408
		12	25409	29875	0.720242	0.853658			12	26000	23020	0.558267	0.734845
		13	24329	37805	0.689628	1.08025			13	23665	19826	0.508131	0.632886
		14	20928	28725	0.593224	0.820798			14	21264	19415	0.456577	0.619766
		15	26057	35075	0.73861	1.00224			15	20739	20522	0.445304	0.655104
		16	21097	28023	0.598014	0.800739			16	25812	22490	0.554231	0.717926
		17	21186	28612	0.600537	0.817569			17	25619	19824	0.550086	0.632822
		18	23892	31494	0.677241	0.89992			18	23499	21469	0.504566	0.685334
		19	16959	23689	0.480719	0.676898			19	24797	20411	0.532437	0.65156
		20	21977	29216	0.622959	0.834828			20	26582	22325	0.570764	0.712659
		21	26156	41756	0.741416	1.19315			21	23590	20263	0.50652	0.646836
		22	19787	28103	0.560881	0.803025			22	21933	24387	0.470941	0.778482
		23	19963	29095	0.56587	0.83137			23	19312	19735	0.414664	0.629981
		24	20625	20580	0.584635	0.58806			24	21802	24186	0.468129	0.772066
		25	34619	35459	0.981308	1.01322			25	25650	20484	0.550752	0.653891
		26	25982	31353	0.736484	0.895891			26	29348	22976	0.630155	0.73344
		27	25490	25582	0.722538	0.730989			27	23946	21951	0.514164	0.70072
		28	22573	30616	0.639853	0.874832			28	23494	20692	0.504459	0.660531						%
		29	20811	25231	0.589907	0.720959			29	25655	21491	0.550859	0.686036			TRP63	S2>S21>1	1	1.66667
		30	20361	22886	0.577151	0.653952			30	21607	18487	0.463942	0.590142				S2>1 S21<1	1
		31	27775	38160	0.787308	1.0904			31	34388	30584	0.738373	0.976303				S21>1 S2<1	5
		32	34788	40907	0.986098	1.16889			32	37702	34513	0.80953	1.10172				S21<1S2<1	53
		33	37358	41778	1.05895	1.19378			33	37360	34967	0.802187	1.11622					60
		34	33153	39161	0.939753	1.119			34	34915	31004	0.749688	0.98971
		35	31708	44932	0.898793	1.2839			35	46342	33098	0.995047	1.05656
		36	34667	39617	0.982668	1.13203			36	37273	32200	0.800319	1.02789
		37	28699	36804	0.8135	1.05165			37	34920	36225	0.749796	1.15638
		38	39322	38356	1.11462	1.096			38	36981	33034	0.794049	1.05451
		39	36162	29378	1.02505	0.839457			39	39955	39233	0.857906	1.2524
		40	41847	43075	1.18619	1.23084			40	36628	30458	0.78647	0.972281
		41	35483	31429	1.0058	0.898063			41	32420	38387	0.696116	1.22539
		42	36431	42650	1.03267	1.2187			42	45744	36796	0.982207	1.1746
		43	39671	40346	1.12451	1.15286			43	36768	33493	0.789476	1.06916
		44	55037	35718	1.56007	1.02062			44	38966	34031	0.836671	1.08634
		45	35396	34580	1.00333	0.988101			45	42675	35161	0.91631	1.12241
		46	31374	34985	0.889325	0.999673			46	39378	36613	0.845517	1.16876
		47	27018	37281	0.76585	1.06528			47	31449	31765	0.675267	1.014
		48	27776	37892	0.787337	1.08274			48	33731	33217	0.724266	1.06035
		49	28036	37018	0.794706	1.05776			49	36802	33786	0.790206	1.07852
		50	27890	35396	0.790568	1.01142			50	40909	31474	0.878391	1.00471
		51	27021	36695	0.765935	1.04854			51	37277	33330	0.800405	1.06396
		52	27021	36695	0.765935	1.04854			52	40696	32556	0.873817	1.03925
		53	28460	33674	0.806725	0.962212			53	31707	31224	0.680807	0.996733
		54	35113	37280	0.995311	1.06525			54	37139	26792	0.797442	0.855255
		55	27596	31262	0.782234	0.893291			55	34777	28498	0.746725	0.909714
		56	32193	33066	0.912541	0.944839			56	30795	27880	0.661225	0.889986
		57	25734	35498	0.729454	1.01433			57	30089	26481	0.646065	0.845327
		58	27518	34294	0.780023	0.979928			58	30428	28414	0.653344	0.907032
		59	29844	41115	0.845956	1.17483			59	34221	27918	0.734787	0.891199
		60	45537	26822	1.29079	0.766421			60	20427	25485	0.438605	0.813533
		61	29743	32886	0.843093	0.939696			61	98224	34116	2.10905	1.08905
		62	22592	30720	0.640391	0.877804			62	59676	45372	1.28135	1.44837
		63	27221	32654	0.771605	0.933067			63	50429	44920	1.0828	1.43394
		64	29000	42622	0.822032	1.2179			64	88638	35403	1.90322	1.13014
		65	28892	34416	0.818971	0.983415			65	55522	46424	1.19216	1.48195
		66	26255	36741	0.744222	1.04985			66	69055	40395	1.48274	1.28949
		67	21637	32664	0.613321	0.933352			67	53461	44054	1.1479	1.40629
		68	26287	36114	0.745129	1.03193			68	45893	39029	0.985406	1.24588
		69	29504	44299	0.836318	1.26581			69	49120	40448	1.0547	1.29118
		70	27531	43857	0.780392	1.25318			70	55057	41008	1.18217	1.30906
		71	27033	32697	0.766276	0.934295			71	46254	41906	0.993157	1.33772
		72	27734	40313	0.786146	1.15192			72	60664	46235	1.30257	1.47591
		73	26375	38323	0.747624	1.09505			73	66059	41148	1.41841	1.31353
		74	33714	35231	0.955655	1.0067			74	44511	43323	0.955732	1.38296
		75	28322	40193	0.802813	1.14849			75	51272	34282	1.1009	1.09435
		76	31243	32988	0.885612	0.94261			76	35309	31530	0.758148	1.0065
		77	33500	33909	0.949589	0.968927			77	48183	35527	1.03458	1.13409
		78	28487	34151	0.807491	0.975842			78	53162	32154	1.14148	1.02642
		79	32381	35564	0.91787	1.01622			79	46899	34927	1.00701	1.11494
		80	25556	36044	0.724409	1.02993			80	37324	29711	0.801414	0.948435
		81	28762	33936	0.815286	0.969699			81	41814	28321	0.897823	0.904064
		82	28415	36175	0.80545	1.03368			82	50161	32895	1.07705	1.05008
		83	27589	41220	0.782036	1.17783			83	50658	38350	1.08772	1.22421
		84	27506	42809	0.779683	1.22324			84	69718	26983	1.49697	0.861352
		85	29782	35274	0.844198	1.00793			85	59282	23259	1.27289	0.742474
		86	32292	36633	0.915347	1.04676			86	72447	24293	1.55557	0.775482
		87	33404	36942	0.946867	1.05559			87	69210	27202	1.48606	0.868343
		88	32531	35827	0.922121	1.02373			88	44407	28253	0.953499	0.901893
		89	27926	39523	0.791588	1.12934			89	67129	29894	1.44138	0.954277
		90	31119	37103	0.882097	1.06019			90	52780	40314	1.13328	1.2869
		91	90285	35959	2.55921	1.0275			91	82127	48455	1.76342	1.54678
		92	76129	27373	2.15795	0.782165			92	104903	27864	2.25246	0.889475
		93	82450	29921	2.33712	0.854973			93	109844	37761	2.35855	1.20541
		94	81919	32660	2.32207	0.933238			94	77205	38230	1.65773	1.22038
		95	91983	31945	2.60734	0.912807			95	91624	49592	1.96733	1.58308
		96	100149	38637	2.83882	1.10403			96	92925	27756	1.99527	0.886028
		97	84182	37836	2.38622	1.08114			97	112149	30621	2.40804	0.977484
		98	81252	36328	2.30316	1.03805			98	74839	26744	1.60693	0.853723
		99	82428	31831	2.3365	0.90955			99	102340	31715	2.19743	1.01241
		100	84068	48009	2.38299	1.37183			100	90423	25039	1.94155	0.799296
			35278.4	34996.4						46572.7	31326.3

## Sheet: Sup. Fig 6F SOX2  int.
Ave int. 20 Cherry+ and 20 Cherry- nuclei
		Donor 2						Donor 4						Donor 1						Donor 3
	# nuclei	shRNA-A		shRNA-B		shRNA-C		shRNA-A		shRNA-B		shRNA-C		shRNA-A		shRNA-B		shRNA-C		shRNA-A		shRNA-B		shRNA-C
		Cherry-	Cherry+	Cherry-	Cherry+	Cherry-	Cherry+	Cherry-	Cherry+	Cherry-	Cherry+	Cherry-	Cherry+	Cherry-	Cherry+	Cherry-	Cherry+	Cherry-	Cherry+	Cherry-	Cherry+	Cherry-	Cherry+	Cherry-	Cherry+
	1	168745	80623	48882	77714	21227	23977	145810	44540	33563	42288	51635	18198	65817	54445	65677	68542	102092	54583	30996	22170	86520	88653	79712	50744
	2	89925	70251	70628	58893	62303	37408	106378	68763	28042	29176	29665	16684	78121	33506	87166	72025	80886	88310	43072	29791	97303	60246	83469	67294
	3	146562	103900	57248	76460	47136	38897	114366	24671	44358	44023	40470	23421	32516	35618	62852	88958	61117	24183	24632	23607	107500	45235	83513	22912
	4	15330	105683	43469	58207	37479	45142	49437	27479	41444	41077	32922	15064	78821	41166	75074	96200	120598	40518	33107	25162	118809	94893	112346	51688
	5	93904	37778	56447	64493	45596	28625	149899	76826	39430	41293	21105	19459	37180	34730	66442	106468	93264	31023	38307	23960	95881	81070	103662	31157
	6	94467	19484	48063	47793	65306	29408	136193	28065	36161	31835	38283	17201	71902	28588	103856	82654	123471	33558	28838	50870	51375	99717	96069	68004
	7	108182	60952	81812	6572	50623	33362	27732	75791	50259	28434	24474	19613	88464	58240	94218	35164	173966	116062	23846	25343	93639	75405	78934	50397
	8	120104	51035	56885	6255	49967	29683	73386	87959	37364	48007	25500	26044	48684	40302	68175	57590	80957	35555	33697	20177	50009	80982	129767	61593
	9	127574	51869	95223	51000	30508	26949	97666	46859	46783	34685	29788	23296	112659	72245	61605	75880	60571	45689	37895	8304	91275	19972	59684	47826
	10	165639	85431	47370	44687	34893	33915	130208	68928	48184	31839	20403	33163	107667	29009	56154	81113	100850	44505	34233	7785	97735	30285	48678	49179
	11	173669	106838	51795	85005	76008	44531	94242	44541	39970	40508	29818	19810	68112	54543	52377	46246	95586	37473	104071	57583	109651	85985	75941	36850
	12	117674	93500	63525	53295	73162	21240	96525	60163	47834	39185	27182	32573	62732	66886	65152	51558	93015	77676	107813	54437	50619	73297	90536	41824
	13	140625	93178	39053	42429	35843	35791	111944	78596	29079	34258	24910	25813	90921	35025	59179	50283	95390	57164	86504	77239	68013	67959	44597	49471
	14	194333	76822	67420	53365	77786	46423	98556	63478	22285	41798	32568	21992	113577	57680	67333	54462	104978	159573	91500	95928	164052	84868	98529	32192
	15	85188	111846	56266	25247	51698	49012	72331	33181	35135	36163	35310	16855	92238	34745	74478	82108	114289	40962	83096	44569	163673	96650	82304	19431
	16	143901	173948	8952	31075	37120	33151	139582	38674	31650	32206	48801	33287	103240	31615	58799	120364	62660	46198			145333	106623	74064	61863
	17	168654	80981	33421	10878	66620	25321	76520	43621	41890	32143	24295	19810	64406	39785	80003	52487	109516	53279			84334	45456	81639	45654
	18	89118	64532	28021	52638	42199	30809	80233	43832	47610	35957	34578	14351	104004	39023	55925	25078	93962	40088			107739	144931	54244	51526
	19	103812	62703	57523	83145	71114	40859	50892		45088	32098	38323	16953	96991	52018	66069	42402	57388	71805			117593	129900	69395	37462
	20	106757	81427	59416	10604	67427	40859	86930		49660	32654	30727	16601	70304	32614	63552	68348	116463	75496			123711	106617	86382	43155
		122708	80639.1	53570.9	46987.8	52200.8	34768.1	96941.5	53109.3	39789.4	36481.3	32037.8	21509.4	79417.8	43589.2	69204.3	67896.5	97050.9	58685	53440.5	37795	101238	80937.2	81673.2	46011.1
			0.657161		0.877113		0.666046		0.547849		0.91686		0.671375		0.548859		0.981102		0.604682		0.707236		0.799473		0.563356
		Scrambled shRNA
	# nuclei	Donor 1		Donor 2		Donor 3
		Cherry-	Cherry+	Cherry-	Cherry+	Cherry-	Cherry+
	1	12417	7507	74700	55622	116076	70149
	2	10341	8032	74023	75640	82481	43978
	3	7804	10253	69063	90908	66699	65785
	4	13157	14153	102156	42122	83068	78199
	5	8968	11525	44703	105443	80337	99423
	6	11594	10533	52564	81511	98301	82386
	7	14617	8624	51018	93888	66996	68371
	8	9094	10173	63147	108831	74885	96716
	9	11196	13534	64296	76911	58343	77968
	10	7519	9788	74928	49626	90613	66304
	11	8651	8140	76338	66000	84133	62047
	12	11689	15025	77046	52357	74794	88136
	13	11493	11537	69511	84658	99101	95705
	14	9165	6114	66990	81979	75278	82436
	15	7338	6036	71700	66736	57196	83274
	16	22891	7255	118374	77553	64956	80486
	17	7267	7715	65577	60741	82049	56051
	18	6830	7848	83365	67867	101260	63232
	19	9340	9672	83005	53032	90366	78267
	20	15687	8403	83178	57801	81479	70573
	AVERAGE	10852.9	9593.35	73284.1	72461.3	81420.6	75474.3
	Ratio		0.883943		0.988772		0.926969

## Sheet: Sup. Fig 6F SOX21 int.
Average intensity of 20 Cherry+ and 20 Cherry- nuclei in each experiment; Intensity was measured in one and the same plane of the z-stack
		Donor 2						Donor 4						Donor 1						Donor 3
	# nuclei	shRNA-A		shRNA-B		shRNA-C		shRNA-A		shRNA-B		shRNA-C		shRNA-A		shRNA-B		shRNA-C		shRNA-A		shRNA-B		shRNA-C
		Cherry-	Cherry+	Cherry-	Cherry+	Cherry-	Cherry+	Cherry-	Cherry+	Cherry-	Cherry+	Cherry-	Cherry+	Cherry-	Cherry+	Cherry-	Cherry+	Cherry-	Cherry+	Cherry-	Cherry+	Cherry-	Cherry+	Cherry-	Cherry+
	1	35545	24074	45446	44309	65033	15995	34109	34472	32520	17240	40154	9798	19590	26089	13337	6903	31437	30362	32528	43120	18560	28319	9671	18156
	2	35378	15973	47704	43557	67180	34665	33108	27224	27053	13236	21184	12450	15769	32446	27204	8220	40273	20766	42411	35292	23955	25268	12186	32496
	3	35336	25367	39315	47892	37563	21853	28716	40841	24760	17103	23479	12355	28712	15413	10724	9654	29593	12932	24622	35612	27240	24487	21182	16555
	4	35629	27655	37690	41452	36599	21593	26613	33306	27629	14275	21272	14600	46950	20554	20222	11598	38261	29642	37643	34659	14355	23614	25396	19570
	5	30047	26889	51813	12447	52212	33986	35886	32684	25859	13045	20168	12947	33565	13387	31655	8741	37646	39921	28147	41889	20318	14599	25644	15985
	6	26112	12159	31339	10059	34459	30395	19749	44981	6074	11177	24016	10120	31494	22269	16376	10007	60703	33014	31380	28423	17829	26461	45801	13022
	7	47524	26118	40670	42408	22316	18848	38764	41619	19762	15798	19452	15446	14000	11773	18497	10310	68353	20018	26959	35184	55845	22146	35638	18136
	8	58431	21229	27736	30450	46584	27695	31380	35424	14570	12215	24492	13262	29218	8918	24958	12322	43775	16734	36349	44862	31361	18603	26288	18095
	9	26169	35483	63225	62812	34197	20688	42794	38220	24316	13765	14440	15784	11411	11726	22487	7664	30533	15613	28681	27961	21135	22722	32684	23320
	10	31193	44196	72500	22484	49351	23715	52450	35303	14972	14277	26082	9186	25901	11361	9871	9251	44807	21343	51250	32773	24077	18725	22983	19648
	11	24569	55312	72520	43970	22819	17326	45460	38487	32827	12363	24604	11098	23992	31726	14410	16467	58079	17820	46494	66159	27707	20908	28522	24222
	12	30516	53769	67618	39877	49166	17003	41515	36409	20537	12095	46392	11595	24235	10850	11420	9969	23515	17512	48328	25478	17271	16207	30475	21567
	13	30780	24349	153362	44587	31965	28767	32389	38371	21646	13023	17774	12060	32500	19642	24124	8948	29459	16199	45925	36318	19288	19637	36456	26721
	14	73344	22825	124263	39043	29586	34976	38336	35247	39626	13506	19749	13671	25402	28445	23856	10988	41884	17982	37414	45283	40152	22045	22229	24282
	15	36678	28862	31953	63247	42543	41700	52237	37758	18954	10177	22104	14555	27694	37641	24087	9431	22488	41791	50084	24456	23384	22372	30848	30708
	16	36455	48104	40740	45422	19825	15471	48809	49907	34167	13417	16188	12482	16321	18224	17665	9805	14332	16407	32336	22408	43652	29084	35136	37755
	17	27153	17454	35868	49916	41224	35314	43460	30722	30234	21351	21844	14658	17990	21024	30341	10333	28935	24237	37535	36635	19696	15825	27036	19266
	18	35048	20860	57266	36330	38028	25307	44466	43240	16656	16334	23627	9426	27363	18033	11804	9075	22440	47360	46737	26649	21662	17347	20585	13213
	19	64043	23762	59295	31840	34447	29624	90003	34848	21775	16629	23813	14933	31368	16019	10966	7000	32170	14457	41593	21807	34754		21407	29163
	20	37816	32393	59930	82094	45876	21897	29901	23906	21388	8034	20834	18277	21644	26053	11556	6714	22275	46372	74949	34084	25891		16141	14116
	AVERAGE	37888.3	29341.7	58012.7	41709.8	40048.7	25840.9	40507.2	36648.4	23766.2	13953	23583.4	12935.1	25256	20079.7	18778	9670	36047.9	25024.1	40068.2	34952.6	26406.6	21576.1	26315.4	21799.8
	Ratio		0.774425		0.718978		0.645238		0.904738		0.587093		0.548485		0.795046		0.514964		0.69419		0.872327		0.817071		0.828405
		Scrambled shRNA
	# nuclei	Donor 2		Donor 4		Donor1		Donor 3
		Cherry-	Cherry+	Cherry-	Cherry+	Cherry-	Cherry+	Cherry-	Cherry+
	1	65563	55924	25378	48646	17458	27436	42464	34778
	2	34752	59167	20700	47522	33924	33796	36667	31875
	3	39321	53817	36368	26963	32003	36457	19762	29827
	4	91055	21521	29289	24903	10907	14509	32662	37492
	5	63956	48208	25239	22560	27446	17657	35267	34158
	6	63922	30474	49034	21786	20223	14451	54296	18581
	7	33298	53346	34269	28369	33893	23476	29143	22645
	8	53487	49716	46942	25404	25588	13297	33957	26624
	9	59234	18227	41010	14734	15571	13511	31680	17740
	10	41164	57835	31405	35013	20080	13820	20676	47580
	11	26703	46822	24271	23496	16003	19467	24209	22826
	12	22416	30896	23047	31280	32273	18092	37042	27913
	13	29636	38243	27256	36064	21264	33965	37884	35952
	14	60050	59777	38316	34313	17773	23894	35949	31877
	15	92015	46007	25316	19118	23361	31077	30530	18971
	16	58183	55660	35330	51369	12700	21869	32247	30019
	17	29530	40437	30870	52262	14529	41012	45987	23990
	18	31267	62888	16531	46800	9637	37712	27020	23359
	19	26769	26461	19774	46808	9513	14964	34845	25788
	20	26219	31037	18354	36691	15372	15921	35316	46838
	AVERAGE	47427	44323.2	29935	33705.1	20475.9	23319.2	33880.2	29441.7
	Ratio		0.934555		1.12594		1.13886		0.868994
